# Supplementary material for: Application of the RBBP9 Serine Hydrolase Inhibitor, ML114, Decouples Human Pluripotent Stem Cell Proliferation and Differentiation
Source: MDPI journal article supplement (doi:10.3390/ijms21238983), 2020-11-26
Supplement: s1 [file s1]

# Supplementary Material

## Supplementary Figure 1

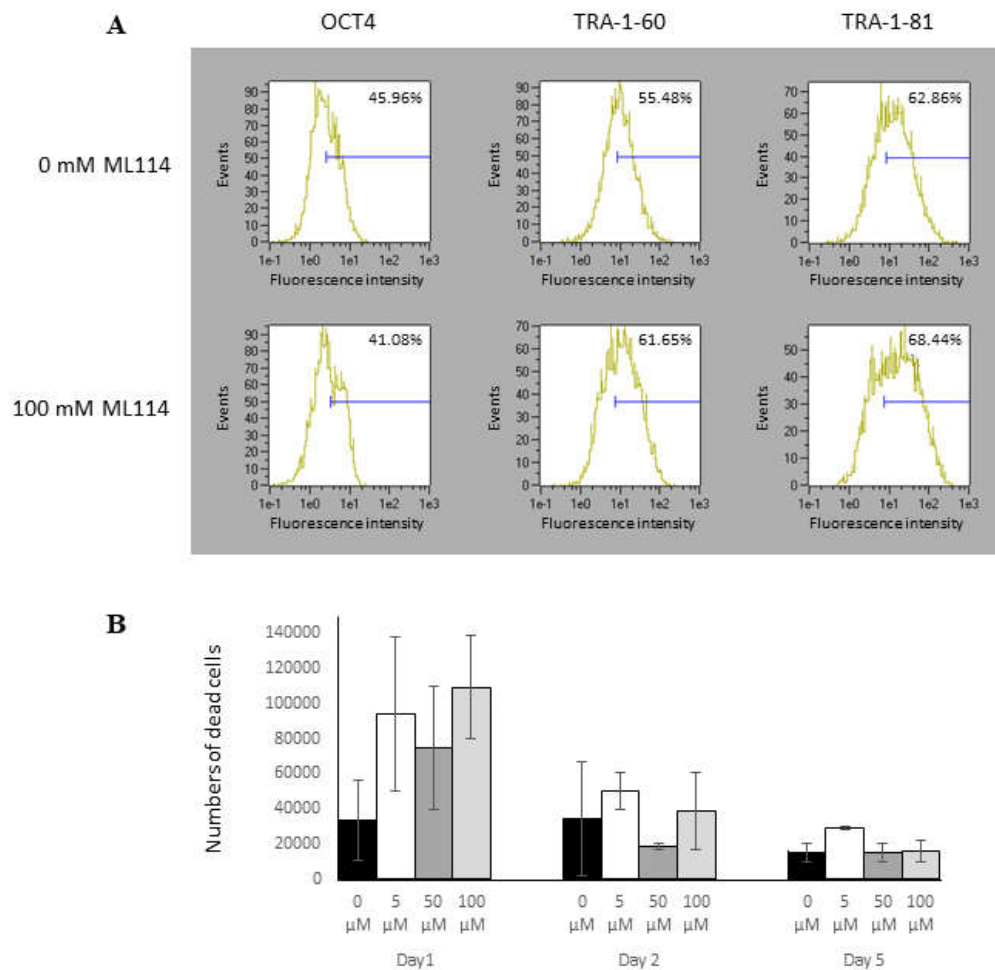

**Supplementary Figure 1.** Counts of dead cell numbers showed no significant difference between the treatments after 24 hours (Day 1;  $p = 0.1$ ), 48 hours (Day 2;  $p = 0.75$ ) or 120 hours (Day 5;  $p = 0.24$ ).

## Supplementary Figure 2

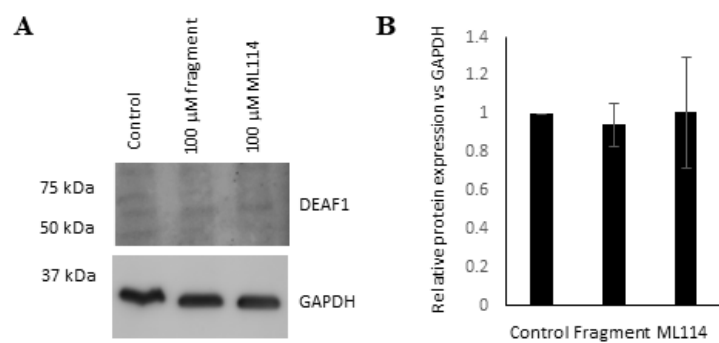

**Supplementary Figure 2. DEAF1 protein expression is not significantly increased by ML114. A, B)** Western blot (A) and associated densitometry quantification (B) showing no difference in DEAF1 protein levels between hPSCs treated with Control (DMSO), ML114 fragment and ML114 (n = 3 for all treatments).

Supplementary Table 2

| <b>Supplementary Table 2: Top 30 Biological Process GO terms for genes up-regulated by ML114</b> | <b>P-Value</b>  | <b>Benjamini</b> |
|--------------------------------------------------------------------------------------------------|-----------------|------------------|
| <b>protein modification process</b>                                                              | <b>1.20E-05</b> | <b>2.50E-02</b>  |
| hexose metabolic process                                                                         | 1.30E-04        | 1.30E-01         |
| regulation of Wnt receptor signaling pathway                                                     | 3.10E-04        | 2.00E-01         |
| endoderm development                                                                             | 3.60E-04        | 1.70E-01         |
| formation of primary germ layer                                                                  | 9.60E-04        | 3.40E-01         |
| lipid modification                                                                               | 1.20E-03        | 3.40E-01         |
| glucose metabolic process                                                                        | 1.30E-03        | 2.70E-01         |
| Wnt receptor signaling pathway                                                                   | 1.30E-03        | 3.00E-01         |
| fatty acid catabolic process                                                                     | 1.30E-03        | 3.30E-01         |
| protein transport                                                                                | 1.40E-03        | 2.70E-01         |
| intracellular signaling cascade                                                                  | 1.50E-03        | 2.60E-01         |
| protein import into peroxisome matrix                                                            | 2.60E-03        | 3.70E-01         |
| fatty acid oxidation                                                                             | 2.70E-03        | 3.40E-01         |
| lipid oxidation                                                                                  | 2.70E-03        | 3.40E-01         |
| regulation of small GTPase mediated signal transduction                                          | 2.70E-03        | 3.60E-01         |
| gastrulation                                                                                     | 3.60E-03        | 4.00E-01         |
| peroxisomal transport                                                                            | 3.80E-03        | 4.00E-01         |
| tissue morphogenesis                                                                             | 4.70E-03        | 4.50E-01         |
| positive regulation of RNA metabolic process                                                     | 5.00E-03        | 4.50E-01         |
| epithelial tube morphogenesis                                                                    | 5.80E-03        | 4.80E-01         |
| positive regulation of transcription, DNA-dependent                                              | 5.90E-03        | 4.70E-01         |
| mesoderm morphogenesis                                                                           | 7.10E-03        | 5.20E-01         |
| hippocampus development                                                                          | 7.80E-03        | 5.30E-01         |
| cellular lipid catabolic process                                                                 | 8.40E-03        | 5.40E-01         |
| cellular protein metabolic process                                                               | 8.60E-03        | 5.40E-01         |
| carboxylic acid catabolic process                                                                | 1.00E-02        | 5.80E-01         |
| pallium development                                                                              | 1.00E-02        | 5.80E-01         |
| anterior/posterior pattern formation                                                             | 1.10E-02        | 5.80E-01         |
| development of secondary sexual characteristics                                                  | 1.10E-02        | 5.90E-01         |
| embryonic placenta development                                                                   | 1.30E-02        | 6.20E-01         |

### Supplementary Table 3

| <b>Supplementary Table 3: Cell cycle regulatory genes whose expression is increased by ML-114</b> |                                                               |
|---------------------------------------------------------------------------------------------------|---------------------------------------------------------------|
| HECTD3                                                                                            | HECT domain containing E3 ubiquitin protein ligase 3          |
| APBB1                                                                                             | Amyloid beta precursor protein binding family B member 1      |
| CAMK2D                                                                                            | Calcium/calmodulin-dependent protein kinase II delta          |
| <b>CDC25C</b>                                                                                     | Cell division cycle 25 homolog C (S. pombe) [Gorilla gorilla] |
| CDC7                                                                                              | Cell cycle division 7                                         |
| HERC2                                                                                             | HECT and RLD domain containing E3 ubiquitin protein ligase 2  |
| PRKCQ                                                                                             | Protein kinase C theta                                        |
| ATM                                                                                               | ATM serine/threonine kinase                                   |
| TGFA                                                                                              | Transforming growth factor alpha                              |
| <b>TGFB1</b>                                                                                      | Transforming growth factor 1                                  |

Supplementary Table 4

| <b>Supplementary Table 4: Genes involved in proteolysis whose expression is increased by ML-114</b> |                                                                              |
|-----------------------------------------------------------------------------------------------------|------------------------------------------------------------------------------|
| ATG10                                                                                               | Auophagy related 10                                                          |
| ATG7                                                                                                | Autophagy related 7                                                          |
| BAP1                                                                                                | BRCA1 associated protein 1                                                   |
| DZIP3                                                                                               | DAZ interacting zinc finger protein 3                                        |
| FBXL5                                                                                               | F-box and leucine-rich repeat protein 5                                      |
| FBXO11                                                                                              | F-box protein 11                                                             |
| FBXO25                                                                                              | F-box protein 25                                                             |
| FBXO4                                                                                               | F-box protein 4                                                              |
| HERC2                                                                                               | HECT and RLD domain containing E3 ubiquitin protein ligase 2                 |
| HERC3                                                                                               | HECT domain containing E3 ubiquitin protein ligase 3                         |
| HECW2                                                                                               | HECT, C2 and WW domain containing E3 ubiquitin protein ligase 2              |
| KEL                                                                                                 | Kell blood group, metallo-endopeptidase                                      |
| MYSM1                                                                                               | Myb-like, SWIRM and MPN domains 1                                            |
| PCNP                                                                                                | PEST proteolytic signal containing nuclear protein                           |
| SEN7                                                                                                | SUMO1/sentrin specific peptidase 7                                           |
| UEVLD                                                                                               | UEV and lactate/malate dehydrogenase domains                                 |
| CHFR                                                                                                | Checkpoint with forkhead and ring finger domains,E3 ubiquitin protein ligase |
| C3                                                                                                  | Complement component 3                                                       |
| DDB1                                                                                                | Damage specific DNA binding protein 1                                        |
| HERC2                                                                                               | HECT and RLD domain containing E3 ubiquitin protein ligase 2                 |
| HECTD3                                                                                              | HECT domain containing E3 ubiquitin protein ligase 3                         |
| HERC6                                                                                               | HECT and RLD domain containing E3 ubiquitin ligase family member 6           |
| HGF                                                                                                 | Hepatocyte growth factor                                                     |
| HDAC6                                                                                               | Histone deacetylase 6                                                        |
| LNK1                                                                                                | Ligand of numb-protein X 1, E3 ubiquitin protein ligase                      |
| <b>MAPK1</b>                                                                                        | <b>Mitogen-activated protein kinase 1</b>                                    |
| PRKCQ                                                                                               | Protein kinase C theta                                                       |
| RING1                                                                                               | Ring finger protein 1                                                        |
| RNF14                                                                                               | Ring finger protein 14                                                       |
| RNF19A                                                                                              | Ring finger protein 19A                                                      |
| UBE3B                                                                                               | Ubiquitin protein ligase E3B                                                 |
| USP20                                                                                               | Ubiquitin specific peptidase 20                                              |
| UBE2H                                                                                               | Ubiquitin conjugating enzyme E2H                                             |
| UBA1                                                                                                | Ubiquitin like modifier activating enzyme 1                                  |

Supplementary Table 5

| <b>Supplementary Table 5: Apoptosis-related genes whose expression is increased by ML-114</b> |                                                                        |
|-----------------------------------------------------------------------------------------------|------------------------------------------------------------------------|
| FASTK                                                                                         | Fas activated serine/threonine kinase                                  |
| STRADB                                                                                        | STE20-related kinase adaptor beta                                      |
| B4GALT1                                                                                       | UDP-Gal:betaGlcNAc beta 1,4- galactosyltransferase, polypeptide 1      |
| ACVR1C                                                                                        | Activin A receptor type IC                                             |
| APP                                                                                           | Amyloid beta precursor protein                                         |
| APBB1                                                                                         | Amyloid beta precursor protein binding family B member 1               |
| ABL1                                                                                          | ABL proto-oncogene 1, non-receptor tyrosine kinase                     |
| CCL2                                                                                          | chemokine (C-C motif) ligand 2                                         |
| <b>CDK5</b>                                                                                   | cyclin-dependent kinase 5                                              |
| ERCC6                                                                                         | excision repair cross-complementation group 6                          |
| GRM4                                                                                          | glutamate receptor, metabotropic 4                                     |
| GSK3B                                                                                         | glycogen synthase kinase 3 beta                                        |
| HGF                                                                                           | Hepatocyte growth factor                                               |
| HDAC3                                                                                         | Histone deacetylase 3                                                  |
| HDAC6                                                                                         | Histone deacetylase 6                                                  |
| ING4                                                                                          | Inhibitor of growth family member 4                                    |
| LCK                                                                                           | LCK proto-oncogene, Src family tyrosine kinase for                     |
| <b>MAPK1</b>                                                                                  | Mitogen-activated protein kinase 1                                     |
| PIK3CA                                                                                        | phosphatidylinositol-4,5-bisphosphate 3-kinase catalytic subunit alpha |
| PRLR                                                                                          | prolactin receptor                                                     |
| CHEK2                                                                                         | Checkpoint kinase 2                                                    |
| PPP2R1A                                                                                       | protein phosphatase 2 regulatory subunit A, alpha                      |
| STK17B                                                                                        | Serine/threonine kinase 17b                                            |
| STAT5A                                                                                        | Signal transducer and activator of transcription 5A                    |
| ATM                                                                                           | ATM serine/threonine kinase                                            |
| <b>TGFB1</b>                                                                                  | Transforming growth factor 1                                           |
| TGFB2                                                                                         | Transforming growth factor 2                                           |
