# Supplementary material for: Application of the RBBP9 Serine Hydrolase Inhibitor, ML114, Decouples Human Pluripotent Stem Cell Proliferation and Differentiation
Source: Int J Mol Sci. 2020 Nov 26;21(23):8983. doi: 10.3390/ijms21238983 (PMC7730578; doi:10.3390/ijms21238983)
Supplement: Supplementary file 1 [file ijms-21-08983-s001.zip › RBBP9 Supp Table 1.xlsx]

## Sheet: Sheet1
Row	Rank	Upregulated in	Feature	Description		Score	Feature P	Q Value	Q Value	Bonferroni	maxT	FWER	Fold Change	CT Mean	CT Std	ML Mean	ML Std
33219	140	ML	7894271	7894271: unannotated transcript: ---:-------		-8.50447	0.00199601	0.0213908	0.035321	1	1	1	1.24726	1.77413	0.0746352	2.2128	0.0491049
32670	1128	ML	8027266	AB266802: Homo sapiens env mRNA for putative retroviral envelope protein, complete cds, alternative transcript for the env gene of a human endogenous retrovirus HC2/HERV-T family provirus, HERV-T (HOM1).		-4.57291	0.00199601	0.0213908	0.035321	1	1	1	1.18689	2.86353	0.188468	3.3987	0.0746158
31344	3750	ML	8081196	OR5H14: olfactory receptor, family 5, subfamily H, member 14		-2.81862	0.00199601	0.0213908	0.035321	1	1	1	1.16858	2.36063	0.0502697	2.7586	0.239329
31483	3446	ML	7892844	7892844: unannotated transcript: ---:-------		-2.9383	0.00199601	0.0213908	0.035321	1	1	1	1.15828	1.81433	0.165084	2.1015	0.0374469
29715	7608	ML	7894541	7894541: unannotated transcript: ---:-------		-1.90081	0.00199601	0.0213908	0.035321	1	1	1	1.14241	1.60213	0.0494799	1.8303	0.201936
32149	2097	ML	8150529	DKK4: dickkopf homolog 4 (Xenopus laevis)		-3.64246	0.00199601	0.0213908	0.035321	1	1	1	1.14025	2.88153	0.0803635	3.28567	0.174562
30706	5244	ML	7895933	7895933: unannotated transcript: ---:-------		-2.37974	0.00199601	0.0213908	0.035321	1	1	1	1.13662	2.40017	0.227812	2.72807	0.071124
33147	244	ML	8065412	CST1: cystatin SN		-7.41755	0.00199601	0.0213908	0.035321	1	1	1	1.13146	3.1231	0.0510048	3.53367	0.0811764
33061	387	ML	8164006	ENST00000410419: ncrna:misc_RNA chromosome:GRCh37:9:125708267:125708373:-1 gene:ENSG00000222351 gene_biotype:misc_RNA transcript_biotype:misc_RNA		-6.47332	0.00199601	0.0213908	0.035321	1	1	1	1.13063	1.80507	0.0488815	2.04087	0.0398905
32072	2252	ML	7895111	7895111: unannotated transcript: ---:-------		-3.54334	0.00199601	0.0213908	0.035321	1	1	1	1.12535	1.8832	0.0760418	2.11927	0.0867952
32985	532	ML	7910134	MIXL1: Mix paired-like homeobox		-5.87407	0.00199601	0.0213908	0.035321	1	1	1	1.12469	3.11053	0.0297809	3.4984	0.110422
32775	935	ML	8152617	HAS2: hyaluronan synthase 2		-4.85621	0.00199601	0.0213908	0.035321	1	1	1	1.11805	3.05553	0.0995035	3.41623	0.0815464
32130	2136	ML	7927631	DKK1: dickkopf 1 homolog (Xenopus laevis)		-3.61442	0.00199601	0.0213908	0.035321	1	1	1	1.11738	2.8501	0.0510095	3.18463	0.151978
32296	1813	ML	7895769	7895769: unannotated transcript: ---:-------		-3.86797	0.00199601	0.0213908	0.035321	1	1	1	1.1131	1.91713	0.0905337	2.13397	0.0350914
32778	929	ML	8085946	EOMES: eomesodermin		-4.86467	0.00199601	0.0213908	0.035321	1	1	1	1.1074	3.05407	0.0464518	3.38207	0.107147
32948	600	ML	8163839	C5: complement component 5		-5.63072	0.00199601	0.0213908	0.035321	1	1	1	1.10578	2.39987	0.00877629	2.65373	0.0775965
33294	7	ML	8009515	TCONS_00025128-XLOC_012299: linc-SOX9-2 chr17:+:70026956-70035822		-18.0602	0.00199601	0.0213908	0.035321	1	0.779	0.779	1.1028	2.41997	0.0138746	2.66873	0.0194086
31947	2506	ML	7929322	CYP26A1: cytochrome P450, family 26, subfamily A, polypeptide 1		-3.39293	0.00199601	0.0213908	0.035321	1	1	1	1.09931	2.9633	0.121696	3.2576	0.0880976
31234	4011	ML	8136790	8136790: unannotated transcript: chr7:142456513-142456642		-2.73438	0.00199601	0.0213908	0.035321	1	1	1	1.09698	2.27537	0.0473323	2.49603	0.13152
32784	919	ML	8129069	ENST00000516073: ncrna:snRNA chromosome:GRCh37:6:115188037:115188140:-1 gene:ENSG00000251882 gene_biotype:snRNA transcript_biotype:snRNA		-4.88061	0.00199601	0.0213908	0.035321	1	1	1	1.09563	2.22313	0.0348002	2.43573	0.0669433
33297	1	ML	7895803	7895803: unannotated transcript: ---:-------		-35.2661	0.00199601	0.0213908	0.035321	1	0.211	0.111	1.09506	2.00323	0.00769567	2.19367	0.00531539
31722	2959	ML	7895327	7895327: unannotated transcript: ---:-------		-3.15436	0.00199601	0.0213908	0.035321	1	1	1	1.09247	2.0731	0.0764893	2.2648	0.0723152
32728	1016	ML	8175297	ENST00000384353: ncrna:snRNA chromosome:GRCh37:X:134052340:134052446:-1 gene:ENSG00000207081 gene_biotype:snRNA transcript_biotype:snRNA		-4.72912	0.00199601	0.0213908	0.035321	1	1	1	1.09243	2.30853	0.0769915	2.5219	0.0133832
33071	371	ML	8091260	SLC9A9: solute carrier family 9, subfamily A (NHE9, cation proton antiporter 9), member 9		-6.57136	0.00199601	0.0213908	0.035321	1	1	1	1.0915	2.87103	0.0098231	3.13373	0.068541
32761	960	ML	8117034	GMPR: guanosine monophosphate reductase		-4.82376	0.00199601	0.0213908	0.035321	1	1	1	1.09115	2.87303	0.0341755	3.1349	0.087597
31444	3521	ML	8128245	ENST00000517082: ncrna:misc_RNA chromosome:GRCh37:6:90608002:90608111:-1 gene:ENSG00000252891 gene_biotype:misc_RNA transcript_biotype:misc_RNA		-2.90711	0.00199601	0.0213908	0.035321	1	1	1	1.0908	1.8707	0.0816723	2.04057	0.0597691
32788	909	ML	7957140	LGR5: leucine-rich repeat containing G protein-coupled receptor 5		-4.89698	0.00199601	0.0213908	0.035321	1	1	1	1.08732	2.54507	0.0410197	2.7673	0.0670514
30793	5028	ML	8081194	OR5H1: olfactory receptor, family 5, subfamily H, member 1		-2.43072	0.00199601	0.0213908	0.035321	1	1	1	1.08578	2.56243	0.00950596	2.78223	0.156333
33204	159	ML	8046283	GAD1: glutamate decarboxylase 1 (brain, 67kDa)		-8.23376	0.00199601	0.0213908	0.035321	1	1	1	1.08482	2.84447	0.0179979	3.08573	0.0474544
32282	1840	ML	8129482	SAMD3: sterile alpha motif domain containing 3		-3.8482	0.00199601	0.0213908	0.035321	1	1	1	1.08481	2.58013	0.0512767	2.79897	0.0840955
32032	2323	ML	8020384	GREB1L: growth regulation by estrogen in breast cancer-like		-3.49804	0.00199601	0.0213908	0.035321	1	1	1	1.08303	2.9262	0.0867043	3.16917	0.0834001
33028	441	ML	7960828	7960828: unannotated transcript: chr12:7842378-7848389		-6.20444	0.00199601	0.0213908	0.035321	1	1	1	1.08203	3.026	0.0392837	3.27423	0.0570872
32515	1412	ML	8097449	PCDH10: protocadherin 10		-4.22747	0.00199601	0.0213908	0.035321	1	1	1	1.0814	3.06073	0.0278626	3.30987	0.0981968
32887	715	ML	8083592	ENST00000364908: ncrna:misc_RNA chromosome:GRCh37:3:156871337:156871429:1 gene:ENSG00000201778 gene_biotype:misc_RNA transcript_biotype:misc_RNA		-5.30131	0.00199601	0.0213908	0.035321	1	1	1	1.08108	2.39737	0.0163464	2.59173	0.0613639
30057	6840	ML	7929373	LGI1: leucine-rich, glioma inactivated 1		-2.02969	0.00199601	0.0213908	0.035321	1	1	1	1.08107	2.82917	0.144403	3.05853	0.132131
32143	2107	ML	8113358	ST8SIA4: ST8 alpha-N-acetyl-neuraminide alpha-2,8-sialyltransferase 4		-3.63624	0.00199601	0.0213908	0.035321	1	1	1	1.0808	2.25917	0.035843	2.4417	0.0792144
30954	4650	ML	8081198	OR5H1: olfactory receptor, family 5, subfamily H, member 1		-2.54696	0.00199601	0.0213908	0.035321	1	1	1	1.07804	2.69537	0.0117581	2.9057	0.142552
33273	39	ML	7895218	7895218: unannotated transcript: ---:-------		-11.3705	0.00199601	0.0213908	0.035321	1	1	1	1.07798	1.9688	0.0190528	2.12233	0.0135633
32050	2290	ML	7896127	7896127: unannotated transcript: ---:-------		-3.51606	0.00199601	0.0213908	0.035321	1	1	1	1.07651	2.4486	0.0349279	2.63593	0.0854171
32139	2115	ML	8115366	RN5S198: RNA, 5S ribosomal 198		-3.62714	0.00199601	0.0213908	0.035321	1	1	1	1.07535	1.72137	0.0476992	1.85107	0.039506
32944	609	ML	7971565	LPAR6: lysophosphatidic acid receptor 6		-5.60364	0.00199601	0.0213908	0.035321	1	1	1	1.0716	2.9335	0.0474396	3.14353	0.0443181
30785	5049	ML	7893927	7893927: unannotated transcript: ---:-------		-2.4255	0.00199601	0.0213908	0.035321	1	1	1	1.06931	2.24597	0.0768664	2.40163	0.0803023
31371	3698	ML	8113278	LIX1: Lix1 homolog (chicken)		-2.83894	0.00199601	0.0213908	0.035321	1	1	1	1.06799	2.80883	0.0562406	2.9998	0.102037
32202	1983	ML	8013341	MFAP4: microfibrillar-associated protein 4		-3.72764	0.00199601	0.0213908	0.035321	1	1	1	1.06758	2.90243	0.0406849	3.09857	0.0815478
32753	974	ML	8117321	TRIM38: tripartite motif containing 38		-4.79856	0.00199601	0.0213908	0.035321	1	1	1	1.06752	2.71603	0.0325208	2.89943	0.0576599
32031	2325	ML	8160163	CER1: cerberus 1, cysteine knot superfamily, homolog (Xenopus laevis)		-3.49776	0.00199601	0.0213908	0.035321	1	1	1	1.06717	3.3137	0.0417963	3.53627	0.10198
30543	5624	ML	7893275	7893275: unannotated transcript: ---:-------		-2.28998	0.00199601	0.0213908	0.035321	1	1	1	1.06677	1.94153	0.0856351	2.07117	0.0477528
31606	3195	ML	7948167	APLNR: apelin receptor		-3.04709	0.00199601	0.0213908	0.035321	1	1	1	1.06605	2.79477	0.0209915	2.97937	0.102811
32456	1534	ML	7946025	OR52A1: olfactory receptor, family 52, subfamily A, member 1		-4.11551	0.00199601	0.0213908	0.035321	1	1	1	1.06549	3.07643	0.0629949	3.2779	0.0567524
32480	1483	ML	8065344	FOXA2: forkhead box A2		-4.16221	0.00199601	0.0213908	0.035321	1	1	1	1.06483	3.00117	0.0300841	3.19573	0.0751698
32247	1903	ML	8065071	FLRT3: fibronectin leucine rich transmembrane protein 3		-3.78788	0.00199601	0.0213908	0.035321	1	1	1	1.06384	2.98407	0.0166158	3.17457	0.0855088
32392	1645	ML	8130703	T: T, brachyury homolog (mouse)		-4.01982	0.00199601	0.0213908	0.035321	1	1	1	1.06364	2.89773	0.0272434	3.08213	0.0746373
32821	838	ML	7898655	CDA: cytidine deaminase		-5.04619	0.00199601	0.0213908	0.035321	1	1	1	1.06319	3.02063	0.00970842	3.2115	0.0647896
31312	3843	ML	8036363	ENST00000383942: ncrna:misc_RNA chromosome:GRCh37:19:37349129:37349231:-1 gene:ENSG00000206669 gene_biotype:misc_RNA transcript_biotype:misc_RNA		-2.79164	0.00199601	0.0213908	0.035321	1	1	1	1.06277	1.8384	0.0687002	1.9538	0.0201666
31879	2642	ML	7976567	BDKRB1: bradykinin receptor B1		-3.31762	0.00199601	0.0213908	0.035321	1	1	1	1.0616	2.73573	0.0198973	2.90427	0.085708
32934	623	ML	8073088	APOBEC3G: apolipoprotein B mRNA editing enzyme, catalytic polypeptide-like 3G		-5.55473	0.00199601	0.0213908	0.035321	1	1	1	1.0615	2.66563	0.0128204	2.82957	0.0494832
32686	1107	ML	8111255	CDH10: cadherin 10, type 2 (T2-cadherin)		-4.59837	0.00199601	0.0213908	0.035321	1	1	1	1.06131	2.4432	0.052766	2.593	0.0199872
32475	1491	ML	8136807	8136807: unannotated transcript: ---:-------		-4.15427	0.00199601	0.0213908	0.035321	1	1	1	1.06111	2.7424	0.0443496	2.91	0.0540004
31019	4500	ML	8103812	ASB5: ankyrin repeat and SOCS box containing 5		-2.5878	0.00199601	0.0213908	0.035321	1	1	1	1.06073	2.4712	0.033129	2.62127	0.094821
32931	632	ML	8108679	PCDHB1: protocadherin beta 1		-5.53594	0.00199601	0.0213908	0.035321	1	1	1	1.06057	2.4452	0.0291216	2.5933	0.0360418
32183	2025	ML	8168534	TBX22: T-box 22		-3.69547	0.00199601	0.0213908	0.035321	1	1	1	1.06034	2.83897	0.0346693	3.01027	0.0724165
32389	1648	ML	8177130	SLC9B1: solute carrier family 9, subfamily B (NHA1, cation proton antiporter 1), member 1		-4.01658	0.00199601	0.0213908	0.035321	1	1	1	1.06007	2.30353	0.0580888	2.4419	0.0136338
31896	2616	ML	8058664	ENST00000462364: ncrna_pseudogene:Mt_tRNA_pseudogene chromosome:GRCh37:2:212642733:212642805:-1 gene:ENSG00000244032 gene_biotype:Mt_tRNA_pseudogene transcript_biotype:Mt_tRNA_pseudogene		-3.33045	0.00199601	0.0213908	0.035321	1	1	1	1.05991	2.40423	0.0538525	2.54827	0.0520665
32653	1157	ML	8057506	FRZB: frizzled-related protein		-4.52365	0.00199601	0.0213908	0.035321	1	1	1	1.05873	3.03117	0.0457817	3.2092	0.050505
28983	9453	ML	7895338	7895338: unannotated transcript: ---:-------		-1.64283	0.00199601	0.0213908	0.035321	1	1	1	1.05842	2.01227	0.104269	2.12983	0.0670218
32306	1788	ML	7974288	ABHD12B: abhydrolase domain containing 12B		-3.88865	0.00199601	0.0213908	0.035321	1	1	1	1.05793	2.82713	0.024948	2.9909	0.0685446
32947	601	ML	8134676	ENST00000362841: ncrna:misc_RNA chromosome:GRCh37:7:99534233:99534334:1 gene:ENSG00000199711 gene_biotype:misc_RNA transcript_biotype:misc_RNA		-5.62793	0.00199601	0.0213908	0.035321	1	1	1	1.05786	2.46533	0.0146289	2.60797	0.0413875
32708	1067	ML	8065416	CST2: cystatin SA		-4.66268	0.00199601	0.0213908	0.035321	1	1	1	1.05744	2.98597	0.0455557	3.15747	0.0445342
31315	3833	ML	8055596	ENST00000467804: ncrna_pseudogene:Mt_tRNA_pseudogene chromosome:GRCh37:2:143854202:143854257:-1 gene:ENSG00000239729 gene_biotype:Mt_tRNA_pseudogene transcript_biotype:Mt_tRNA_pseudogene		-2.79481	0.00199601	0.0213908	0.035321	1	1	1	1.05711	2.44577	0.0449785	2.58543	0.0739528
31670	3065	ML	7893987	7893987: unannotated transcript: ---:-------		-3.11684	0.00199601	0.0213908	0.035321	1	1	1	1.05621	2.3454	0.0174365	2.47723	0.0711554
32468	1508	ML	7894270	7894270: unannotated transcript: ---:-------		-4.14071	0.00199601	0.0213908	0.035321	1	1	1	1.05617	2.68213	0.0584492	2.8328	0.0235727
31301	3866	ML	8140995	CALCR: calcitonin receptor		-2.78321	0.00199601	0.0213908	0.035321	1	1	1	1.05612	2.71447	0.035351	2.8668	0.0879623
33241	103	ML	7958262	TCP11L2: t-complex 11 (mouse)-like 2		-9.09271	0.00199601	0.0213908	0.035321	1	1	1	1.05585	2.9646	0.0129503	3.13017	0.028757
31434	3554	ML	7946023	OR52A5: olfactory receptor, family 52, subfamily A, member 5		-2.89714	0.00199601	0.0213908	0.035321	1	1	1	1.05486	2.3744	0.016709	2.50467	0.0760663
32956	588	ML	8144712	KIAA1456: KIAA1456		-5.66682	0.00199601	0.0213908	0.035321	1	1	1	1.05437	2.52053	0.00641275	2.65757	0.0413901
32992	510	ML	7966089	CMKLR1: chemokine-like receptor 1		-5.96476	0.00199601	0.0213908	0.035321	1	1	1	1.05436	2.778	0.0407957	2.929	0.016072
31324	3810	ML	7979131	GNG2: guanine nucleotide binding protein (G protein), gamma 2		-2.80018	0.00199601	0.0213908	0.035321	1	1	1	1.05417	1.9354	0.041089	2.04023	0.0501648
32817	845	ML	8152938	HHLA1: HERV-H LTR-associating 1		-5.03586	0.00199601	0.0213908	0.035321	1	1	1	1.05362	2.7875	0.0265818	2.93697	0.0440023
31126	4255	ML	7966631	LHX5: LIM homeobox 5		-2.66175	0.00199601	0.0213908	0.035321	1	1	1	1.05359	2.96377	0.0517123	3.1226	0.0894887
31918	2571	ML	7989073	PRTG: protogenin		-3.36081	0.00199601	0.0213908	0.035321	1	1	1	1.05344	3.1588	0.0678619	3.3276	0.0544306
32666	1134	ML	8020141	APCDD1: adenomatosis polyposis coli down-regulated 1		-4.55689	0.00199601	0.0213908	0.035321	1	1	1	1.05286	3.13087	0.0189674	3.29637	0.059978
31909	2593	ML	8102232	LEF1: lymphoid enhancer-binding factor 1		-3.3416	0.00199601	0.0213908	0.035321	1	1	1	1.05275	2.72043	0.0328299	2.86393	0.0667429
31738	2929	ML	8121257	PRDM1: PR domain containing 1, with ZNF domain		-3.17028	0.00199601	0.0213908	0.035321	1	1	1	1.05273	2.84407	0.0374588	2.99403	0.0728685
30498	5726	ML	8029435	GENSCAN00000003566: cdna:genscan chromosome:GRCh37:19:44968448:44977100:1 transcript_biotype:protein_coding		-2.2632	0.00199601	0.0213908	0.035321	1	1	1	1.05217	1.95143	0.0644728	2.05323	0.0437381
32722	1028	ML	8055465	CXCR4: chemokine (C-X-C motif) receptor 4		-4.70996	0.00199601	0.0213908	0.035321	1	1	1	1.05178	2.8965	0.00836481	3.04647	0.054511
31092	4333	ML	7896507	7896507: unannotated transcript: ---:-------		-2.63777	0.00199601	0.0213908	0.035321	1	1	1	1.05149	2.18603	0.0176976	2.2986	0.0717652
33192	176	ML	7934936	SLC16A12: solute carrier family 16, member 12 (monocarboxylic acid transporter 12)		-7.98102	0.00199601	0.0213908	0.035321	1	1	1	1.05129	3.0528	0.0230382	3.20937	0.0249753
31908	2594	ML	8062532	ARHGAP40: Rho GTPase activating protein 40		-3.34036	0.00199601	0.0213908	0.035321	1	1	1	1.05116	2.8122	0.033928	2.95607	0.0664362
31458	3493	ML	8180223	NM_001010871.1: Homo sapiens hypothetical protein LOC221442 (LOC221442), mRNA.		-2.9164	0.00199601	0.0213908	0.035321	1	1	1	1.05076	2.55557	0.0549415	2.6853	0.0540179
28991	9419	ML	7894349	7894349: unannotated transcript: ---:-------		-1.64687	0.00199601	0.0213908	0.035321	1	1	1	1.05063	1.74207	0.068389	1.83027	0.0626713
32634	1191	ML	8045336	GPR39: G protein-coupled receptor 39		-4.48076	0.00199601	0.0213908	0.035321	1	1	1	1.05058	2.837	0.0442542	2.9805	0.0334444
31747	2911	ML	8028277	ENST00000483794: ncrna_pseudogene:Mt_tRNA_pseudogene chromosome:GRCh37:19:38063538:38063595:1 gene:ENSG00000241730 gene_biotype:Mt_tRNA_pseudogene transcript_biotype:Mt_tRNA_pseudogene		-3.17878	0.00199601	0.0213908	0.035321	1	1	1	1.0504	1.8897	0.0133593	1.98493	0.0501415
31388	3669	ML	7910010	ENST00000384160: ncrna:snRNA chromosome:GRCh37:1:224493082:224493185:1 gene:ENSG00000206887 gene_biotype:snRNA transcript_biotype:snRNA		-2.84974	0.00199601	0.0213908	0.035321	1	1	1	1.05032	2.23763	0.0589255	2.35023	0.0348061
32231	1925	ML	8103851	ENST00000464416: ncrna_pseudogene:snoRNA_pseudogene chromosome:GRCh37:4:181405960:181406042:-1 gene:ENSG00000242005 gene_biotype:snoRNA_pseudogene transcript_biotype:snoRNA_pseudogene		-3.76799	0.00199601	0.0213908	0.035321	1	1	1	1.05013	1.71813	0.0375406	1.80427	0.0125835
30999	4546	ML	7967486	CCDC92: coiled-coil domain containing 92		-2.57556	0.00199601	0.0213908	0.035321	1	1	1	1.04977	2.82673	0.0472267	2.96743	0.0819914
32418	1611	ML	7893663	7893663: unannotated transcript: ---:-------		-4.04204	0.00199601	0.0213908	0.035321	1	1	1	1.04959	2.7291	0.034655	2.86443	0.0464978
32337	1730	ML	7917612	HFM1: HFM1, ATP-dependent DNA helicase homolog (S. cerevisiae)		-3.94558	0.00199601	0.0213908	0.035321	1	1	1	1.04951	2.6372	0.00851352	2.76777	0.0566811
32691	1100	ML	8123246	SLC22A3: solute carrier family 22 (extraneuronal monoamine transporter), member 3		-4.61001	0.00199601	0.0213908	0.035321	1	1	1	1.0492	2.85517	0.021698	2.99563	0.0481087
32177	2040	ML	8036430	ZNF781: zinc finger protein 781		-3.68261	0.00199601	0.0213908	0.035321	1	1	1	1.04918	2.26937	0.00898128	2.38097	0.051715
32814	855	ML	7893028	7893028: unannotated transcript: ---:-------		-5.014	0.00199601	0.0213908	0.035321	1	1	1	1.04842	2.91057	0.0191683	3.0515	0.0447521
29976	7014	ML	8005630	ENST00000464477: ncrna_pseudogene:Mt_tRNA_pseudogene chromosome:GRCh37:17:19502898:19502966:1 gene:ENSG00000240945 gene_biotype:Mt_tRNA_pseudogene transcript_biotype:Mt_tRNA_pseudogene		-1.9987	0.00199601	0.0213908	0.035321	1	1	1	1.04839	2.15007	0.0856884	2.2541	0.0280228
30989	4569	ML	8149324	FAM167A: family with sequence similarity 167, member A		-2.5691	0.00199601	0.0213908	0.035321	1	1	1	1.0483	2.88757	0.0284099	3.02703	0.0896318
31400	3632	ML	8111271	CDH9: cadherin 9, type 2 (T1-cadherin)		-2.86269	0.00199601	0.0213908	0.035321	1	1	1	1.04829	2.79983	0.02807	2.93503	0.0768349
31218	4056	ML	7919776	ENST00000470561: ncrna_pseudogene:snRNA_pseudogene chromosome:GRCh37:1:150580073:150580151:-1 gene:ENSG00000241686 gene_biotype:snRNA_pseudogene transcript_biotype:snRNA_pseudogene		-2.71961	0.00199601	0.0213908	0.035321	1	1	1	1.04715	2.13353	0.053656	2.23413	0.0350135
32422	1600	ML	7929282	HHEX: hematopoietically expressed homeobox		-4.0521	0.00199601	0.0213908	0.035321	1	1	1	1.04712	2.82543	0.0386254	2.95857	0.0417912
33276	36	ML	8113073	ARRDC3: arrestin domain containing 3		-11.5062	0.00199601	0.0213908	0.035321	1	1	1	1.04679	3.1872	0.0126645	3.33633	0.018536
30830	4945	ML	7954240	CAPZA3: capping protein (actin filament) muscle Z-line, alpha 3		-2.45653	0.00199601	0.0213908	0.035321	1	1	1	1.04671	1.92247	0.0570079	2.01227	0.0275504
33150	241	ML	8174119	ZMAT1: zinc finger, matrin-type 1		-7.44115	0.00199601	0.0213908	0.035321	1	1	1	1.04658	2.81227	0.0238504	2.94327	0.0189985
32641	1180	ML	8078920	MOBP: myelin-associated oligodendrocyte basic protein		-4.49034	0.00199601	0.0213908	0.035321	1	1	1	1.04637	2.6446	0.0355945	2.76723	0.0311547
32970	561	ML	7979696	ENST00000363990: ncrna:misc_RNA chromosome:GRCh37:14:66644245:66644353:-1 gene:ENSG00000200860 gene_biotype:misc_RNA transcript_biotype:misc_RNA		-5.77475	0.00199601	0.0213908	0.035321	1	1	1	1.04637	1.89637	0.0176647	1.9843	0.0195847
32369	1681	ML	7917850	ARHGAP29: Rho GTPase activating protein 29		-3.99045	0.00199601	0.0213908	0.035321	1	1	1	1.04629	2.8104	0.0401014	2.9405	0.0397581
33094	333	ML	7949971	CPT1A: carnitine palmitoyltransferase 1A (liver)		-6.7445	0.00199601	0.0213908	0.035321	1	1	1	1.04611	3.00573	0.0319264	3.14433	0.0157361
30859	4881	ML	8035787	8035787: unannotated transcript: chr19:20199709-20200818		-2.47331	0.00199601	0.0213908	0.035321	1	1	1	1.04603	2.50257	0.0370968	2.61777	0.0716392
32437	1568	ML	7906400	IFI16: interferon, gamma-inducible protein 16		-4.07791	0.00199601	0.0213908	0.035321	1	1	1	1.04599	2.8177	0.0415804	2.9473	0.0360717
31813	2761	ML	7960861	ENST00000364793: ncrna:misc_RNA chromosome:GRCh37:12:8003313:8003414:-1 gene:ENSG00000201663 gene_biotype:misc_RNA transcript_biotype:misc_RNA		-3.25162	0.00199601	0.0213908	0.035321	1	1	1	1.04582	2.19933	0.048884	2.3001	0.0221682
31849	2690	ML	8138308	ENST00000516565: ncrna:misc_RNA chromosome:GRCh37:7:14050294:14050388:-1 gene:ENSG00000252374 gene_biotype:misc_RNA transcript_biotype:misc_RNA		-3.29309	0.00199601	0.0213908	0.035321	1	1	1	1.04558	1.60367	0.0379421	1.67677	0.00621718
31259	3946	ML	8006681	LHX1: LIM homeobox 1		-2.75593	0.00199601	0.0213908	0.035321	1	1	1	1.04521	2.9668	0.00920163	3.10093	0.0837966
31772	2865	ML	8148992	CSMD1: CUB and Sushi multiple domains 1		-3.19848	0.00199601	0.0213908	0.035321	1	1	1	1.04505	2.77423	0.0206001	2.8992	0.0644608
31781	2849	ML	7925735	OR14A16: olfactory receptor, family 14, subfamily A, member 16		-3.20571	0.00199601	0.0213908	0.035321	1	1	1	1.04463	2.4309	0.0398089	2.5394	0.0430335
29639	7797	ML	7892962	7892962: unannotated transcript: ---:-------		-1.8729	0.00199601	0.0213908	0.035321	1	1	1	1.0445	2.35933	0.049925	2.46433	0.0832862
31515	3360	ML	7916998	ENST00000391064: ncrna:snRNA chromosome:GRCh37:1:73183346:73183452:-1 gene:ENSG00000212366 gene_biotype:snRNA transcript_biotype:snRNA		-2.97795	0.00199601	0.0213908	0.035321	1	1	1	1.0444	2.1728	0.0353229	2.26927	0.0435928
31923	2559	ML	8005603	SLC47A1: solute carrier family 47, member 1		-3.36931	0.00199601	0.0213908	0.035321	1	1	1	1.04439	2.87737	0.0288032	3.0051	0.0590092
32364	1687	ML	8119423	ADCY10P1: adenylate cyclase 10 (soluble) pseudogene 1		-3.98507	0.00199601	0.0213908	0.035321	1	1	1	1.04439	2.81747	0.0362108	2.94253	0.0405414
30208	6439	ML	8110520	8110520: unannotated transcript: chr5:179121198-179121803		-2.10725	0.00199601	0.0213908	0.035321	1	1	1	1.04413	2.5249	0.0882925	2.63633	0.0243642
31074	4370	ML	8046238	MYO3B: myosin IIIB		-2.62823	0.00199601	0.0213908	0.035321	1	1	1	1.0441	2.7005	0.0206756	2.8196	0.075717
32789	907	ML	8046792	DUSP19: dual specificity phosphatase 19		-4.90535	0.00199601	0.0213908	0.035321	1	1	1	1.04402	2.72613	0.0298205	2.84613	0.0301009
32039	2303	ML	7916862	WLS: wntless homolog (Drosophila)		-3.50936	0.00199601	0.0213908	0.035321	1	1	1	1.04396	3.147	0.0389555	3.28533	0.0560705
31187	4123	ML	8115443	8115443: unannotated transcript: chr5:156085598-156087446		-2.70101	0.00199601	0.0213908	0.035321	1	1	1	1.04374	2.81047	0.0728759	2.9334	0.0300601
31803	2794	ML	8146687	ADHFE1: alcohol dehydrogenase, iron containing, 1		-3.2366	0.00199601	0.0213908	0.035321	1	1	1	1.04371	2.9215	0.066844	3.0492	0.0142116
31872	2652	ML	8016311	WNT3: wingless-type MMTV integration site family, member 3		-3.30991	0.00199601	0.0213908	0.035321	1	1	1	1.04371	3.12237	0.0273763	3.25883	0.0659561
30744	5162	ML	7896619	7896619: unannotated transcript: ---:-------		-2.39981	0.00199601	0.0213908	0.035321	1	1	1	1.04359	2.3256	0.0431869	2.42697	0.0590544
31901	2606	ML	7988348	ENST00000516362: ncrna:misc_RNA chromosome:GRCh37:15:45339301:45339413:-1 gene:ENSG00000252171 gene_biotype:misc_RNA transcript_biotype:misc_RNA		-3.33391	0.00199601	0.0213908	0.035321	1	1	1	1.0435	1.73633	0.0219281	1.81187	0.0325431
32045	2295	ML	7896717	7896717: unannotated transcript: ---:-------		-3.51359	0.00199601	0.0213908	0.035321	1	1	1	1.04317	2.9961	0.0604059	3.12543	0.0203947
32371	1678	ML	7896699	7896699: unannotated transcript: ---:-------		-3.9957	0.00199601	0.0213908	0.035321	1	1	1	1.04313	2.95763	0.048144	3.0852	0.0272022
31051	4434	ML	8057677	SLC40A1: solute carrier family 40 (iron-regulated transporter), member 1		-2.61035	0.00199601	0.0213908	0.035321	1	1	1	1.04308	2.50543	0.0137715	2.61337	0.0702806
32833	818	ML	8051583	CYP1B1: cytochrome P450, family 1, subfamily B, polypeptide 1		-5.08609	0.00199601	0.0213908	0.035321	1	1	1	1.04308	3.08757	0.00880928	3.22057	0.0444277
31011	4517	ML	8166593	IL1RAPL1: interleukin 1 receptor accessory protein-like 1		-2.58306	0.00199601	0.0213908	0.035321	1	1	1	1.04296	2.68307	0.016677	2.79833	0.0754707
33051	404	ML	8139118	8139118: unannotated transcript: chr7:38383495-38389612		-6.36039	0.00199601	0.0213908	0.035321	1	1	1	1.04288	2.73253	0.00366379	2.8497	0.0316956
32828	825	ML	8106978	RFESD: Rieske (Fe-S) domain containing		-5.06905	0.00199601	0.0213908	0.035321	1	1	1	1.04252	2.6309	0.0377064	2.74277	0.00626844
33014	472	ML	8047577	ALS2CR8: amyotrophic lateral sclerosis 2 (juvenile) chromosome region, candidate 8		-6.07233	0.00199601	0.0213908	0.035321	1	1	1	1.04238	2.82267	0.0194562	2.9423	0.0280337
33138	254	ML	8166671	CXorf22: chromosome X open reading frame 22		-7.29113	0.00199601	0.0213908	0.035321	1	1	1	1.04231	2.3251	0.0178225	2.42347	0.015113
32324	1760	ML	8094743	RHOH: ras homolog family member H		-3.91055	0.00199601	0.0213908	0.035321	1	1	1	1.04179	2.9331	0.0471993	3.05567	0.0268198
32526	1395	ML	8061382	CSTL1: cystatin-like 1		-4.24372	0.00199601	0.0213908	0.035321	1	1	1	1.04177	2.10293	0.0322103	2.19077	0.0157361
30860	4880	ML	8108713	PCDHB8: protocadherin beta 8		-2.47346	0.00199601	0.0213908	0.035321	1	1	1	1.04174	2.39903	0.0210443	2.49917	0.0668862
31116	4278	ML	7896641	7896641: unannotated transcript: ---:-------		-2.65502	0.00199601	0.0213908	0.035321	1	1	1	1.04167	2.08783	0.0325861	2.17483	0.0464694
30956	4647	ML	7934156	NODAL: nodal homolog (mouse)		-2.54756	0.00199601	0.0213908	0.035321	1	1	1	1.04162	3.2375	0.0698378	3.37223	0.0592778
31891	2626	ML	8090823	SLCO2A1: solute carrier organic anion transporter family, member 2A1		-3.32367	0.00199601	0.0213908	0.035321	1	1	1	1.04161	3.02563	0.00708684	3.15153	0.0652259
32075	2248	ML	7923991	PLXNA2: plexin A2		-3.54606	0.00199601	0.0213908	0.035321	1	1	1	1.0415	2.81663	0.0156273	2.93353	0.054919
32583	1278	ML	8059279	EPHA4: EPH receptor A4		-4.38394	0.00199601	0.0213908	0.035321	1	1	1	1.0413	3.14857	0.021457	3.2786	0.0466794
30583	5539	ML	8083895	ENST00000458788: ncrna:snoRNA chromosome:GRCh37:3:171411001:171411104:1 gene:ENSG00000238359 gene_biotype:snoRNA transcript_biotype:snoRNA		-2.31053	0.00199601	0.0213908	0.035321	1	1	1	1.04112	2.22353	0.0141797	2.31497	0.0670589
32890	711	ML	8163637	TNC: tenascin C		-5.32189	0.00199601	0.0213908	0.035321	1	1	1	1.04106	2.94877	0.029677	3.06983	0.0259192
31590	3222	ML	8120059	ENST00000391166: ncrna:snRNA chromosome:GRCh37:6:45986482:45986588:1 gene:ENSG00000212468 gene_biotype:snRNA transcript_biotype:snRNA		-3.03502	0.00199601	0.0213908	0.035321	1	1	1	1.04035	1.8887	0.0219153	1.9649	0.0375605
30586	5534	ML	7932306	ENST00000459384: ncrna:snoRNA chromosome:GRCh37:10:16440654:16440758:-1 gene:ENSG00000238552 gene_biotype:snoRNA transcript_biotype:snoRNA		-2.31099	0.00199601	0.0213908	0.035321	1	1	1	1.04034	2.02673	0.055144	2.1085	0.0267344
32362	1690	ML	7981785	OR4N3P: olfactory receptor, family 4, subfamily N, member 3 pseudogene		-3.98338	0.00199601	0.0213908	0.035321	1	1	1	1.04031	2.0293	0.0279022	2.1111	0.0220583
32559	1328	ML	7935892	FGF8: fibroblast growth factor 8 (androgen-induced)		-4.3079	0.00199601	0.0213908	0.035321	1	1	1	1.04025	3.055	0.0199008	3.17797	0.0452584
30685	5285	ML	8055624	ZEB2: zinc finger E-box binding homeobox 2		-2.37017	0.00199601	0.0213908	0.035321	1	1	1	1.04024	2.78423	0.0290404	2.89627	0.0765471
33045	412	ML	7902977	KIAA1107: KIAA1107		-6.32101	0.00199601	0.0213908	0.035321	1	1	1	1.03991	2.80733	0.0204158	2.91937	0.0229263
32193	2000	ML	8103389	CTSO: cathepsin O		-3.71635	0.00199601	0.0213908	0.035321	1	1	1	1.0397	2.76073	0.00496622	2.87033	0.0508384
30760	5113	ML	7974737	LRRC9: leucine rich repeat containing 9		-2.41134	0.00199601	0.0213908	0.035321	1	1	1	1.03969	2.442	0.0513839	2.53893	0.0469848
32361	1691	ML	7977801	ENST00000391033: ncrna:misc_RNA chromosome:GRCh37:14:23321825:23321937:-1 gene:ENSG00000212335 gene_biotype:misc_RNA transcript_biotype:misc_RNA		-3.98253	0.00199601	0.0213908	0.035321	1	1	1	1.03963	2.16613	0.0363657	2.25197	0.00842991
33103	315	ML	7902965	BTBD8: BTB (POZ) domain containing 8		-6.83798	0.00199601	0.0213908	0.035321	1	1	1	1.03961	2.6186	0.0184813	2.72233	0.0186773
32857	773	ML	7909681	PROX1: prospero homeobox 1		-5.17254	0.00199601	0.0213908	0.035321	1	1	1	1.0396	2.79743	0.025115	2.9082	0.027294
31837	2717	ML	8170228	ENST00000408448: ncrna:snRNA chromosome:GRCh37:X:138967640:138967762:1 gene:ENSG00000221375 gene_biotype:snRNA transcript_biotype:snRNA		-3.27982	0.00199601	0.0213908	0.035321	1	1	1	1.03951	1.8022	0.0352705	1.8734	0.0130296
33295	5	ML	8073081	APOBEC3F: apolipoprotein B mRNA editing enzyme, catalytic polypeptide-like 3F		-19.3483	0.00199601	0.0213908	0.035321	1	0.599	0.599	1.03933	2.97943	0.00676782	3.0966	0.00801311
31466	3476	ML	7929525	C10orf131: chromosome 10 open reading frame 131		-2.92569	0.00199601	0.0213908	0.035321	1	1	1	1.03932	1.9356	0.0289729	2.0117	0.0345004
32877	737	ML	7973743	BNIP3P1: BCL2/adenovirus E1B 19kDa interacting protein 3 pseudogene 1		-5.24518	0.00199601	0.0213908	0.035321	1	1	1	1.0393	3.0503	0.0389959	3.17017	0.006787
31904	2601	ML	7916506	C1orf168: chromosome 1 open reading frame 168		-3.33672	0.00199601	0.0213908	0.035321	1	1	1	1.03929	2.3558	0.0301144	2.44837	0.0374425
32147	2099	ML	7895482	7895482: unannotated transcript: ---:-------		-3.63992	0.00199601	0.0213908	0.035321	1	1	1	1.03906	2.7962	0.0494728	2.90543	0.0159438
31275	3921	ML	8113113	KIAA0825: KIAA0825		-2.76401	0.00199601	0.0213908	0.035321	1	1	1	1.03905	2.4456	0.0370935	2.5411	0.046962
32104	2193	ML	8171472	TMEM27: transmembrane protein 27		-3.58087	0.00199601	0.0213908	0.035321	1	1	1	1.03899	2.79763	0.0447846	2.9067	0.0278824
29748	7525	ML	7893753	7893753: unannotated transcript: ---:-------		-1.91765	0.00199601	0.0213908	0.035321	1	1	1	1.03888	1.7197	0.0575094	1.78657	0.0184451
33158	225	ML	8147065	RALYL: RALY RNA binding protein-like		-7.55035	0.00199601	0.0213908	0.035321	1	1	1	1.03845	2.30947	0.0201003	2.39827	0.00330807
30848	4908	ML	8110084	MSX2: msh homeobox 2		-2.46781	0.00199601	0.0213908	0.035321	1	1	1	1.03841	2.8302	0.0227581	2.9389	0.0728183
31261	3943	ML	7987385	MEIS2: Meis homeobox 2		-2.75669	0.00199601	0.0213908	0.035321	1	1	1	1.03835	2.8602	0.0437	2.9699	0.0533013
31931	2545	ML	8136795	PRSS1: protease, serine, 1 (trypsin 1)		-3.37393	0.00199601	0.0213908	0.035321	1	1	1	1.03834	2.51597	0.0486821	2.61243	0.00908424
32224	1942	ML	7970676	SHISA2: shisa homolog 2 (Xenopus laevis)		-3.76024	0.00199601	0.0213908	0.035321	1	1	1	1.03829	3.15243	0.0146234	3.27313	0.0536396
32683	1114	ML	7910387	RHOU: ras homolog family member U		-4.59256	0.00199601	0.0213908	0.035321	1	1	1	1.03825	3.13513	0.0169025	3.25507	0.0419553
32299	1807	ML	8111234	CDH12: cadherin 12, type 2 (N-cadherin 2)		-3.87392	0.00199601	0.0213908	0.035321	1	1	1	1.03813	2.25097	0.0132247	2.3368	0.036026
32597	1247	ML	8117435	BTN3A2: butyrophilin, subfamily 3, member A2		-4.41523	0.00199601	0.0213908	0.035321	1	1	1	1.03809	2.80803	0.028737	2.915	0.0305776
31423	3568	ML	8113103	KIAA0825: KIAA0825		-2.89178	0.00199601	0.0213908	0.035321	1	1	1	1.03808	2.6443	0.0592162	2.745	0.0114595
32900	690	ML	7974214	KLHDC1: kelch domain containing 1		-5.38443	0.00199601	0.0213908	0.035321	1	1	1	1.03805	2.2529	0.0146666	2.33863	0.0233552
30888	4812	ML	7988465	ENST00000365672: ncrna:misc_RNA chromosome:GRCh37:15:48617755:48617868:-1 gene:ENSG00000202542 gene_biotype:misc_RNA transcript_biotype:misc_RNA		-2.49163	0.00199601	0.0213908	0.035321	1	1	1	1.03804	2.15987	0.0444	2.24203	0.0359319
32289	1827	ML	7960464	VWF: von Willebrand factor		-3.85834	0.00199601	0.0213908	0.035321	1	1	1	1.03801	2.69517	0.0208361	2.7976	0.0409918
32274	1859	ML	8132243	RN5S229: RNA, 5S ribosomal 229		-3.82535	0.00199601	0.0213908	0.035321	1	1	1	1.03794	2.3649	0.0356859	2.45463	0.019424
33016	469	ML	7935169	CYP2C8: cytochrome P450, family 2, subfamily C, polypeptide 8		-6.08441	0.00199601	0.0213908	0.035321	1	1	1	1.03792	2.61453	0.0192887	2.71367	0.0205994
33183	191	ML	8136801	PRSS3P2: protease, serine, 3 pseudogene 2		-7.88332	0.00199601	0.0213908	0.035321	1	1	1	1.03741	2.74137	0.00447474	2.84393	0.0220863
32937	620	ML	8047381	8047381: unannotated transcript: chr2:201980890-202029016		-5.56627	0.00199601	0.0213908	0.035321	1	1	1	1.03733	2.8398	0.00926013	2.9458	0.0316574
31424	3566	ML	7919166	ENST00000384378: ncrna:snRNA chromosome:GRCh37:1:144311213:144311376:-1 gene:ENSG00000207106 gene_biotype:snRNA transcript_biotype:snRNA		-2.89191	0.00199601	0.0213908	0.035321	1	1	1	1.03702	2.6016	0.0233004	2.6979	0.0527609
31425	3567	ML	7919160	ENST00000384378: ncrna:snRNA chromosome:GRCh37:1:144311213:144311376:-1 gene:ENSG00000207106 gene_biotype:snRNA transcript_biotype:snRNA		-2.89191	0.00199601	0.0213908	0.035321	1	1	1	1.03702	2.6016	0.0233004	2.6979	0.0527609
31290	3890	ML	8096160	ARHGAP24: Rho GTPase activating protein 24		-2.77419	0.00199601	0.0213908	0.035321	1	1	1	1.037	2.65163	0.0432162	2.74973	0.0434017
31046	4444	ML	7958273	AY358241: Homo sapiens clone DNA147263 AAGG6488 (UNQ6488) mRNA, complete cds.		-2.60749	0.00199601	0.0213908	0.035321	1	1	1	1.03693	2.40833	0.0532194	2.49727	0.0256422
30525	5659	ML	8159846	ENST00000517182: ncrna:snRNA chromosome:GRCh37:9:1001858:1001963:-1 gene:ENSG00000252991 gene_biotype:snRNA transcript_biotype:snRNA		-2.28095	0.00199601	0.0213908	0.035321	1	1	1	1.03661	2.1497	0.0574645	2.2284	0.0164082
33136	259	ML	8097513	MGST2: microsomal glutathione S-transferase 2		-7.25081	0.00199601	0.0213908	0.035321	1	1	1	1.0366	2.9426	0.00738986	3.0503	0.0246428
30033	6885	ML	7950895	ENST00000485328: ncrna_pseudogene:Mt_tRNA_pseudogene chromosome:GRCh37:11:87524948:87525012:-1 gene:ENSG00000240037 gene_biotype:Mt_tRNA_pseudogene transcript_biotype:Mt_tRNA_pseudogene		-2.02127	0.00199601	0.0213908	0.035321	1	1	1	1.03623	2.30857	0.0257045	2.3922	0.0668982
33235	115	ML	8121803	CLVS2: clavesin 2		-8.87503	0.00199601	0.0213908	0.035321	1	1	1	1.03619	2.7196	0.0178502	2.81803	0.00709953
32648	1167	ML	7893501	7893501: unannotated transcript: ---:-------		-4.50338	0.00199601	0.0213908	0.035321	1	1	1	1.0361	2.7819	0.0355308	2.88233	0.0151546
30815	4970	ML	8087778	ENST00000408088: ncrna:snRNA chromosome:GRCh37:3:51645454:51645578:-1 gene:ENSG00000221015 gene_biotype:snRNA transcript_biotype:snRNA		-2.44804	0.00199601	0.0213908	0.035321	1	1	1	1.036	2.3112	0.0432482	2.3944	0.0399351
29677	7702	ML	7895566	7895566: unannotated transcript: ---:-------		-1.88624	0.00199601	0.0213908	0.035321	1	1	1	1.03599	2.27113	0.0257321	2.35287	0.0705029
32230	1926	ML	8083233	ZIC1: Zic family member 1		-3.76752	0.00199601	0.0213908	0.035321	1	1	1	1.03596	2.83407	0.0236348	2.93597	0.0404477
33267	56	ML	8169995	FAM122C: family with sequence similarity 122C		-10.188	0.00199601	0.0213908	0.035321	1	1	1	1.03574	3.0224	0.00227156	3.13043	0.0182256
32229	1932	ML	8020455	GATA6: GATA binding protein 6		-3.76552	0.00199601	0.0213908	0.035321	1	1	1	1.03572	3.06987	0.0185689	3.17953	0.0469021
31194	4107	ML	8105607	FAM159B: family with sequence similarity 159, member B		-2.70719	0.00199601	0.0213908	0.035321	1	1	1	1.03562	2.9739	0.0561421	3.07983	0.0379686
31902	2604	ML	7971296	EPSTI1: epithelial stromal interaction 1 (breast)		-3.33483	0.00199601	0.0213908	0.035321	1	1	1	1.03543	2.51383	0.023824	2.6029	0.0396531
31692	3018	ML	8162283	ROR2: receptor tyrosine kinase-like orphan receptor 2		-3.13344	0.00199601	0.0213908	0.035321	1	1	1	1.03536	3.04677	0.0142584	3.1545	0.0578189
31098	4316	ML	8166714	LANCL3: LanC lantibiotic synthetase component C-like 3 (bacterial)		-2.64467	0.00199601	0.0213908	0.035321	1	1	1	1.0352	2.6043	0.0543363	2.69597	0.0255283
31662	3080	ML	7901316	SLC5A9: solute carrier family 5 (sodium/glucose cotransporter), member 9		-3.10553	0.00199601	0.0213908	0.035321	1	1	1	1.0352	2.70487	0.00716682	2.80007	0.0526101
31672	3061	ML	7904693	AK024925: Homo sapiens cDNA: FLJ21272 fis, clone COL01753.		-3.11762	0.00199601	0.0213908	0.035321	1	1	1	1.03518	2.82677	0.0432076	2.9262	0.0344208
32334	1738	ML	7950473	ARRB1: arrestin, beta 1		-3.93883	0.00199601	0.0213908	0.035321	1	1	1	1.03516	3.3487	0.0252014	3.46643	0.0452239
30630	5418	ML	8062693	ENST00000364151: ncrna:snRNA chromosome:GRCh37:20:42034113:42034218:1 gene:ENSG00000201021 gene_biotype:snRNA transcript_biotype:snRNA		-2.33711	0.00199601	0.0213908	0.035321	1	1	1	1.03512	2.07577	0.0378503	2.14867	0.0385518
32618	1213	ML	8160786	KIAA1161: KIAA1161		-4.46024	0.00199601	0.0213908	0.035321	1	1	1	1.03507	3.14583	0.0256172	3.25617	0.0343442
28830	9814	ML	8094774	ENST00000362920: ncrna:snRNA chromosome:GRCh37:4:41086624:41086730:1 gene:ENSG00000199790 gene_biotype:snRNA transcript_biotype:snRNA		-1.60004	0.00199601	0.0213908	0.035321	1	1	1	1.03492	1.6753	0.015969	1.7338	0.0612801
32243	1908	ML	8056995	TTC30B: tetratricopeptide repeat domain 30B		-3.78192	0.00199601	0.0213908	0.035321	1	1	1	1.03477	2.73917	0.034303	2.8344	0.0269368
31169	4172	ML	8095832	ENST00000478832: ncrna_pseudogene:scRNA_pseudogene chromosome:GRCh37:4:77311562:77311641:1 gene:ENSG00000241914 gene_biotype:scRNA_pseudogene transcript_biotype:scRNA_pseudogene		-2.6901	0.00199601	0.0213908	0.035321	1	1	1	1.03476	1.61187	0.0267622	1.6679	0.0241948
31953	2493	ML	7907702	SOAT1: sterol O-acyltransferase 1		-3.3977	0.00199601	0.0213908	0.035321	1	1	1	1.03469	2.99543	0.0178399	3.09933	0.0498704
32037	2305	ML	8160213	TTC39B: tetratricopeptide repeat domain 39B		-3.50805	0.00199601	0.0213908	0.035321	1	1	1	1.03464	3.0058	0.0122882	3.10993	0.0499244
31643	3112	ML	8140478	PION: pigeon homolog (Drosophila)		-3.08965	0.00199601	0.0213908	0.035321	1	1	1	1.03461	2.80977	0.0492266	2.907	0.0234085
32640	1183	ML	7893056	7893056: unannotated transcript: ---:-------		-4.48679	0.00199601	0.0213908	0.035321	1	1	1	1.03458	2.6573	0.028007	2.7492	0.0217759
32899	692	ML	8147000	ZFHX4: zinc finger homeobox 4		-5.37889	0.00199601	0.0213908	0.035321	1	1	1	1.03457	3.00913	0.0132387	3.11317	0.0307728
32384	1655	ML	8090018	PARP9: poly (ADP-ribose) polymerase family, member 9		-4.0106	0.00199601	0.0213908	0.035321	1	1	1	1.03455	2.7292	0.0218337	2.8235	0.0343778
32341	1723	ML	7893529	7893529: unannotated transcript: ---:-------		-3.9512	0.00199601	0.0213908	0.035321	1	1	1	1.03455	2.9338	0.00857146	3.03517	0.0436006
33242	102	ML	8115875	DRD1: dopamine receptor D1		-9.12451	0.00199601	0.0213908	0.035321	1	1	1	1.0345	2.55463	0.00786151	2.64277	0.0147676
30875	4842	ML	8092541	LIPH: lipase, member H		-2.4819	0.00199601	0.0213908	0.035321	1	1	1	1.03449	2.5919	0.0184822	2.6813	0.0595893
32863	764	ML	8143747	ENST00000464127: ncrna_pseudogene:tRNA_pseudogene chromosome:GRCh37:7:149335514:149335580:-1 gene:ENSG00000242350 gene_biotype:tRNA_pseudogene transcript_biotype:tRNA_pseudogene		-5.17857	0.00199601	0.0213908	0.035321	1	1	1	1.03442	1.83787	0.0198001	1.90113	0.00746481
31798	2808	ML	8167726	RN5S504: RNA, 5S ribosomal 504		-3.2291	0.00199601	0.0213908	0.035321	1	1	1	1.03442	1.9465	0.0259467	2.0135	0.0248658
31359	3723	ML	8100389	ENST00000459598: ncrna:snoRNA chromosome:GRCh37:4:54989267:54989371:-1 gene:ENSG00000238753 gene_biotype:snoRNA transcript_biotype:snoRNA		-2.82901	0.00199601	0.0213908	0.035321	1	1	1	1.03438	1.8576	0.0157807	1.92147	0.0357763
32769	950	ML	8044450	ZC3H6: zinc finger CCCH-type containing 6		-4.8371	0.00199601	0.0213908	0.035321	1	1	1	1.0343	3.07543	0.0343576	3.18093	0.0157055
32610	1225	ML	7979529	KCNH5: potassium voltage-gated channel, subfamily H (eag-related), member 5		-4.44709	0.00199601	0.0213908	0.035321	1	1	1	1.03428	2.5125	0.0279448	2.59863	0.0185608
31999	2392	ML	7950701	ODZ4: odz, odd Oz/ten-m homolog 4 (Drosophila)		-3.45374	0.00199601	0.0213908	0.035321	1	1	1	1.03419	2.95863	0.0112669	3.0598	0.0494683
32581	1280	ML	8016994	RNF43: ring finger protein 43		-4.3819	0.00199601	0.0213908	0.035321	1	1	1	1.03415	2.9734	0.0260056	3.07493	0.030568
32715	1053	ML	8171161	ARSE: arylsulfatase E (chondrodysplasia punctata 1)		-4.66942	0.00199601	0.0213908	0.035321	1	1	1	1.03414	3.117	0.0120826	3.2234	0.0375725
32733	1007	ML	8105077	CARD6: caspase recruitment domain family, member 6		-4.73952	0.00199601	0.0213908	0.035321	1	1	1	1.03402	2.42427	0.0104409	2.50673	0.0282709
32555	1335	ML	8167218	ENST00000459223: ncrna:snoRNA chromosome:GRCh37:X:47941136:47941239:1 gene:ENSG00000238473 gene_biotype:snoRNA transcript_biotype:snoRNA		-4.30074	0.00199601	0.0213908	0.035321	1	1	1	1.03395	1.84173	0.0104175	1.90427	0.0229287
31582	3240	ML	7917008	LRRIQ3: leucine-rich repeats and IQ motif containing 3		-3.02593	0.00199601	0.0213908	0.035321	1	1	1	1.03393	2.31733	0.0102725	2.39597	0.0438221
32711	1059	ML	7895361	7895361: unannotated transcript: ---:-------		-4.66619	0.00199601	0.0213908	0.035321	1	1	1	1.0339	2.9062	0.0207719	3.00473	0.0301039
32395	1642	ML	8098556	CCDC111: coiled-coil domain containing 111		-4.02431	0.00199601	0.0213908	0.035321	1	1	1	1.03389	2.94873	0.0243192	3.04867	0.0354757
32256	1884	ML	8161839	NMRK1: nicotinamide riboside kinase 1		-3.806	0.00199601	0.0213908	0.035321	1	1	1	1.03359	2.72607	0.0380997	2.81763	0.0168776
31010	4521	ML	8054513	LOC151009: uncharacterized LOC151009		-2.5819	0.00199601	0.0213908	0.035321	1	1	1	1.03355	2.6748	0.0474735	2.76453	0.0370127
31802	2797	ML	7912638	C1orf126: chromosome 1 open reading frame 126		-3.23606	0.00199601	0.0213908	0.035321	1	1	1	1.03342	2.83903	0.0457653	2.9339	0.0219939
32057	2276	ML	8144995	FGF17: fibroblast growth factor 17		-3.52664	0.00199601	0.0213908	0.035321	1	1	1	1.03341	2.9694	0.017674	3.0686	0.0454017
30171	6547	ML	7968632	SPG20OS: SPG20 opposite strand		-2.08834	0.00199601	0.0213908	0.035321	1	1	1	1.03323	2.7716	0.0718885	2.8637	0.0258269
32681	1116	ML	7932742	ENST00000516001: ncrna:misc_RNA chromosome:GRCh37:10:28072775:28072982:-1 gene:ENSG00000251810 gene_biotype:misc_RNA transcript_biotype:misc_RNA		-4.58911	0.00199601	0.0213908	0.035321	1	1	1	1.03322	2.26583	0.0049521	2.3411	0.0279727
31696	3011	ML	8101616	C4orf36: chromosome 4 open reading frame 36		-3.13617	0.00199601	0.0213908	0.035321	1	1	1	1.03314	2.70797	0.00323934	2.7977	0.0494521
31990	2407	ML	8114354	NME5: NME/NM23 family member 5		-3.44523	0.00199601	0.0213908	0.035321	1	1	1	1.03312	2.4617	0.0158616	2.54323	0.0377966
32673	1125	ML	7942064	GAL: galanin prepropeptide		-4.57828	0.00199601	0.0213908	0.035321	1	1	1	1.03312	3.38057	0.0138121	3.49253	0.040044
31426	3565	ML	8105302	FST: follistatin		-2.89237	0.00199601	0.0213908	0.035321	1	1	1	1.03312	3.31763	0.0165896	3.4275	0.0636661
30719	5216	ML	8097949	ENST00000488871: ncrna_pseudogene:Mt_tRNA_pseudogene chromosome:GRCh37:4:156382402:156382467:1 gene:ENSG00000240105 gene_biotype:Mt_tRNA_pseudogene transcript_biotype:Mt_tRNA_pseudogene		-2.3866	0.00199601	0.0213908	0.035321	1	1	1	1.03311	1.7054	0.034732	1.76187	0.02175
31197	4102	ML	7917634	HFM1: HFM1, ATP-dependent DNA helicase homolog (S. cerevisiae)		-2.70867	0.00199601	0.0213908	0.035321	1	1	1	1.03309	2.47973	0.0407419	2.5618	0.0330751
31517	3357	ML	7918052	OLFM3: olfactomedin 3		-2.97823	0.00199601	0.0213908	0.035321	1	1	1	1.03309	2.7104	0.0216506	2.8001	0.047462
33116	295	ML	8175177	MBNL3: muscleblind-like splicing regulator 3		-6.94822	0.00199601	0.0213908	0.035321	1	1	1	1.03306	3.10123	0.0111635	3.20377	0.0229927
32699	1086	ML	8102862	MAML3: mastermind-like 3 (Drosophila)		-4.62638	0.00199601	0.0213908	0.035321	1	1	1	1.03303	3.069	0.0343746	3.17037	0.0160815
33044	413	ML	7898663	PINK1: PTEN induced putative kinase 1		-6.32077	0.00199601	0.0213908	0.035321	1	1	1	1.03298	3.1275	0.0106532	3.23063	0.0261764
31608	3187	ML	8030879	ENST00000491698: ncrna_pseudogene:rRNA_pseudogene chromosome:GRCh37:19:52571512:52571601:1 gene:ENSG00000243288 gene_biotype:rRNA_pseudogene transcript_biotype:rRNA_pseudogene		-3.05096	0.00199601	0.0213908	0.035321	1	1	1	1.03288	2.02677	0.0356856	2.0934	0.0125503
31050	4436	ML	8046276	SP5: Sp5 transcription factor		-2.60992	0.00199601	0.0213908	0.035321	1	1	1	1.03282	3.09303	0.0265097	3.19453	0.0619237
31540	3308	ML	8105013	EGFLAM: EGF-like, fibronectin type III and laminin G domains		-2.99748	0.00199601	0.0213908	0.035321	1	1	1	1.03267	2.7139	0.0362584	2.80257	0.0361984
32642	1179	ML	7920687	GBAP1: glucosidase, beta, acid pseudogene 1		-4.49058	0.00199601	0.0213908	0.035321	1	1	1	1.03265	2.95843	0.0326497	3.05503	0.0179514
31441	3526	ML	8152240	ENST00000364346: ncrna:misc_RNA chromosome:GRCh37:8:103962695:103962792:-1 gene:ENSG00000201216 gene_biotype:misc_RNA transcript_biotype:misc_RNA		-2.90572	0.00199601	0.0213908	0.035321	1	1	1	1.03263	2.61107	0.016953	2.69627	0.0478732
31348	3743	ML	8113691	DTWD2: DTW domain containing 2		-2.82117	0.00199601	0.0213908	0.035321	1	1	1	1.03261	3.19473	0.0069515	3.2989	0.0635739
32200	1987	ML	8037005	TGFB1: transforming growth factor, beta 1		-3.72465	0.00199601	0.0213908	0.035321	1	1	1	1.03257	3.03437	0.0219905	3.1332	0.0403575
32998	498	ML	8098637	CYP4V2: cytochrome P450, family 4, subfamily V, polypeptide 2		-5.99943	0.00199601	0.0213908	0.035321	1	1	1	1.03256	2.95367	0.0236781	3.04983	0.014497
32121	2158	ML	7986350	ARRDC4: arrestin domain containing 4		-3.60514	0.00199601	0.0213908	0.035321	1	1	1	1.03254	3.07327	0.0461385	3.17327	0.013396
33037	423	ML	7924450	DUSP10: dual specificity phosphatase 10		-6.28477	0.00199601	0.0213908	0.035321	1	1	1	1.0323	2.89967	0.0151038	2.99333	0.0209343
32824	831	ML	7967660	RIMBP2: RIMS binding protein 2		-5.06242	0.00199601	0.0213908	0.035321	1	1	1	1.03225	2.8648	0.0178603	2.9572	0.0260851
31929	2548	ML	7917304	MCOLN3: mucolipin 3		-3.37353	0.00199601	0.0213908	0.035321	1	1	1	1.03222	2.9719	0.0344458	3.06767	0.0350865
31288	3898	ML	8097288	FAT4: FAT tumor suppressor homolog 4 (Drosophila)		-2.77071	0.00199601	0.0213908	0.035321	1	1	1	1.03222	3.018	0.060083	3.11523	0.00920072
30550	5606	ML	8080142	ENST00000494496: ncrna_pseudogene:scRNA_pseudogene chromosome:GRCh37:3:51906267:51906480:1 gene:ENSG00000241789 gene_biotype:scRNA_pseudogene transcript_biotype:scRNA_pseudogene		-2.2959	0.00199601	0.0213908	0.035321	1	1	1	1.03219	2.42537	0.0248148	2.50343	0.0534113
33272	40	ML	8049471	CXCR7: chemokine (C-X-C motif) receptor 7		-11.2519	0.00199601	0.0213908	0.035321	1	1	1	1.03205	2.3464	0.00507149	2.4216	0.0104058
31586	3229	ML	7892809	7892809: unannotated transcript: ---:-------		-3.03091	0.00199601	0.0213908	0.035321	1	1	1	1.03199	1.768	0.0229867	1.82457	0.022728
30688	5278	ML	7936201	WDR96: WD repeat domain 96		-2.37265	0.00199601	0.0213908	0.035321	1	1	1	1.03195	2.33063	0.0242143	2.4051	0.0486704
31760	2887	ML	8003228	ENST00000363079: ncrna:misc_RNA chromosome:GRCh37:16:86309036:86309129:-1 gene:ENSG00000199949 gene_biotype:misc_RNA transcript_biotype:misc_RNA		-3.19027	0.00199601	0.0213908	0.035321	1	1	1	1.03195	1.95723	0.00553655	2.01977	0.0334959
32463	1521	ML	7913216	PLA2G2A: phospholipase A2, group IIA (platelets, synovial fluid)		-4.13011	0.00199601	0.0213908	0.035321	1	1	1	1.03195	2.91187	0.0315792	3.0049	0.0229122
31468	3474	ML	8103695	MFAP3L: microfibrillar-associated protein 3-like		-2.92677	0.00199601	0.0213908	0.035321	1	1	1	1.03194	2.88393	0.00557345	2.97603	0.0542187
33065	381	ML	8178324	ZNRD1-AS1: ZNRD1 antisense RNA 1 (non-protein coding)		-6.5201	0.00199601	0.0213908	0.035321	1	1	1	1.03185	2.55537	0.0192838	2.63677	0.00978383
31924	2557	ML	7976642	ERVH-4: endogenous retrovirus group H, member 4		-3.36995	0.00199601	0.0213908	0.035321	1	1	1	1.03184	3.00623	0.0471477	3.10197	0.0140756
32633	1192	ML	8083223	C3orf58: chromosome 3 open reading frame 58		-4.48068	0.00199601	0.0213908	0.035321	1	1	1	1.03184	3.2848	0.00494267	3.3894	0.0401309
32600	1240	ML	7955943	PDE1B: phosphodiesterase 1B, calmodulin-dependent		-4.42894	0.00199601	0.0213908	0.035321	1	1	1	1.03182	2.8465	0.0207877	2.93707	0.0286764
28552	10485	ML	7893891	7893891: unannotated transcript: ---:-------		-1.51679	0.00199601	0.0213908	0.035321	1	1	1	1.03175	2.0271	0.0187329	2.09147	0.0710745
32840	806	ML	8146738	MCMDC2: minichromosome maintenance domain containing 2		-5.10923	0.00199601	0.0213908	0.035321	1	1	1	1.03173	2.6283	0.0117384	2.7117	0.025721
32142	2108	ML	8081298	GPR128: G protein-coupled receptor 128		-3.63539	0.00199601	0.0213908	0.035321	1	1	1	1.03155	2.26747	0.0143615	2.339	0.0309078
30923	4716	ML	8063534	ENST00000516727: ncrna:snoRNA chromosome:GRCh37:20:55182733:55182849:1 gene:ENSG00000252536 gene_biotype:snoRNA transcript_biotype:snoRNA		-2.52295	0.00199601	0.0213908	0.035321	1	1	1	1.0314	1.7079	0.0264789	1.76153	0.0255852
30874	4844	ML	8133006	ENST00000476770: ncrna_pseudogene:Mt_tRNA_pseudogene chromosome:GRCh37:7:57259638:57259703:1 gene:ENSG00000242274 gene_biotype:Mt_tRNA_pseudogene transcript_biotype:Mt_tRNA_pseudogene		-2.4816	0.00199601	0.0213908	0.035321	1	1	1	1.0314	1.7199	0.00261534	1.7739	0.0375988
30595	5510	ML	8108693	8108693: unannotated transcript: chr5:140501581-140505201		-2.31609	0.00199601	0.0213908	0.035321	1	1	1	1.03134	2.55767	0.0352653	2.63783	0.0484822
32576	1293	ML	8103601	DDX60L: DEAD (Asp-Glu-Ala-Asp) box polypeptide 60-like		-4.36108	0.00199601	0.0213908	0.035321	1	1	1	1.03128	2.5962	0.0283328	2.6774	0.0154039
32106	2191	ML	8052072	FSHR: follicle stimulating hormone receptor		-3.58313	0.00199601	0.0213908	0.035321	1	1	1	1.03126	2.56667	0.024487	2.6469	0.0300764
32379	1663	ML	8155212	ENST00000410828: ncrna:snRNA chromosome:GRCh37:9:36267780:36267919:1 gene:ENSG00000222760 gene_biotype:snRNA transcript_biotype:snRNA		-4.00577	0.00199601	0.0213908	0.035321	1	1	1	1.0312	2.35327	0.0161029	2.4267	0.0273655
31263	3941	ML	8129560	CTAGE4: CTAGE family, member 4		-2.75754	0.00199601	0.0213908	0.035321	1	1	1	1.03119	2.55087	0.0458404	2.63043	0.0199089
32933	627	ML	8125805	GRM4: glutamate receptor, metabotropic 4		-5.54812	0.00199601	0.0213908	0.035321	1	1	1	1.03117	3.2862	0.0250138	3.38863	0.0199229
33036	424	ML	7953737	CLEC6A: C-type lectin domain family 6, member A		-6.2774	0.00199601	0.0213908	0.035321	1	1	1	1.03105	2.60433	0.0219368	2.6852	0.00407799
31949	2499	ML	8088560	ADAMTS9: ADAM metallopeptidase with thrombospondin type 1 motif, 9		-3.39651	0.00199601	0.0213908	0.035321	1	1	1	1.03096	2.8352	0.0248574	2.92297	0.0372191
31862	2670	ML	8096415	MMRN1: multimerin 1		-3.30346	0.00199601	0.0213908	0.035321	1	1	1	1.03092	2.5007	0.00311769	2.57803	0.0404269
32014	2363	ML	8037298	CD177: CD177 molecule		-3.47266	0.00199601	0.0213908	0.035321	1	1	1	1.0309	2.8144	0.0343291	2.90137	0.0265142
33179	195	ML	8154059	SMARCA2: SWI/SNF related, matrix associated, actin dependent regulator of chromatin, subfamily a, member 2		-7.86542	0.00199601	0.0213908	0.035321	1	1	1	1.0309	3.01323	0.0194294	3.10633	0.00654319
33261	72	ML	8070097	DNAJC28: DnaJ (Hsp40) homolog, subfamily C, member 28		-9.75923	0.00199601	0.0213908	0.035321	1	1	1	1.03089	2.7387	0.012674	2.8233	0.00805047
32895	696	ML	7933088	ENST00000516812: ncrna:misc_RNA chromosome:GRCh37:10:37591928:37592037:-1 gene:ENSG00000252621 gene_biotype:misc_RNA transcript_biotype:misc_RNA		-5.3702	0.00199601	0.0213908	0.035321	1	1	1	1.03078	1.90593	0.00488092	1.9646	0.0182814
31927	2553	ML	8128726	PPIL6: peptidylprolyl isomerase (cyclophilin)-like 6		-3.37205	0.00199601	0.0213908	0.035321	1	1	1	1.0307	2.71097	0.0271242	2.7942	0.0330465
32831	822	ML	8064868	GPCPD1: glycerophosphocholine phosphodiesterase GDE1 homolog (S. cerevisiae)		-5.07416	0.00199601	0.0213908	0.035321	1	1	1	1.03067	3.067	0.0313885	3.16107	0.0067656
30964	4624	ML	7905054	ENST00000384378: ncrna:snRNA chromosome:GRCh37:1:144311213:144311376:-1 gene:ENSG00000207106 gene_biotype:snRNA transcript_biotype:snRNA		-2.55377	0.00199601	0.0213908	0.035321	1	1	1	1.03063	2.58347	0.0270823	2.6626	0.0463369
30946	4667	ML	8053266	TACR1: tachykinin receptor 1		-2.54111	0.00199601	0.0213908	0.035321	1	1	1	1.03061	2.60353	0.00925761	2.68323	0.0535299
32999	495	ML	7928308	DDIT4: DNA-damage-inducible transcript 4		-6.00468	0.00199601	0.0213908	0.035321	1	1	1	1.03046	3.06837	0.00367469	3.16183	0.0267089
30832	4936	ML	8165862	ENST00000364790: ncrna:snoRNA chromosome:GRCh37:X:5328163:5328292:1 gene:ENSG00000201660 gene_biotype:snoRNA transcript_biotype:snoRNA		-2.45817	0.00199601	0.0213908	0.035321	1	1	1	1.0304	1.76093	0.0100947	1.81447	0.0363442
32122	2156	ML	7896232	7896232: unannotated transcript: ---:-------		-3.60597	0.00199601	0.0213908	0.035321	1	1	1	1.0304	2.83457	0.0358974	2.92073	0.0206003
30402	5959	ML	7976783	DLK1: delta-like 1 homolog (Drosophila)		-2.21338	0.00199601	0.0213908	0.035321	1	1	1	1.03037	3.08667	0.0368883	3.1804	0.063399
32764	955	ML	7983157	TMEM62: transmembrane protein 62		-4.82778	0.00199601	0.0213908	0.035321	1	1	1	1.03033	3.0829	0.0245065	3.1764	0.0229059
30497	5728	ML	8047926	MAP2: microtubule-associated protein 2		-2.26295	0.00199601	0.0213908	0.035321	1	1	1	1.03012	2.86763	0.0442603	2.954	0.0491002
32201	1984	ML	8123467	C6orf70: chromosome 6 open reading frame 70		-3.72749	0.00199601	0.0213908	0.035321	1	1	1	1.03009	2.9787	0.0227185	3.06833	0.0349082
30625	5432	ML	8072482	RN5S496: RNA, 5S ribosomal 496		-2.33354	0.00199601	0.0213908	0.035321	1	1	1	1.03003	2.21893	0.0168542	2.28557	0.0464978
33145	246	ML	8115600	C5orf54: chromosome 5 open reading frame 54		-7.41467	0.00199601	0.0213908	0.035321	1	1	1	1.0299	2.7616	0.0155885	2.84417	0.011358
32972	559	ML	7956251	IL23A: interleukin 23, alpha subunit p19		-5.77801	0.00199601	0.0213908	0.035321	1	1	1	1.02988	2.9604	0.0196731	3.04887	0.0177832
31886	2633	ML	8101304	RASGEF1B: RasGEF domain family, member 1B		-3.3219	0.00199601	0.0213908	0.035321	1	1	1	1.02988	2.94613	0.0209879	3.03417	0.0408216
31351	3738	ML	7988426	SLC30A4: solute carrier family 30 (zinc transporter), member 4		-2.8231	0.00199601	0.0213908	0.035321	1	1	1	1.02986	2.582	0.0265174	2.6591	0.0391715
32650	1164	ML	7973101	RNASE6: ribonuclease, RNase A family, k6		-4.51022	0.00199601	0.0213908	0.035321	1	1	1	1.02974	2.29087	0.0182248	2.359	0.0187742
32823	833	ML	7902617	SAMD13: sterile alpha motif domain containing 13		-5.05745	0.00199601	0.0213908	0.035321	1	1	1	1.02958	2.546	0.0232095	2.6213	0.011241
31320	3820	ML	8069131	LRRC3DN: LRRC3 downstream neighbor (non-protein coding)		-2.79701	0.00199601	0.0213908	0.035321	1	1	1	1.02956	2.85827	0.0229531	2.94277	0.0470239
30878	4833	ML	8041582	PKDCC: protein kinase domain containing, cytoplasmic homolog (mouse)		-2.48448	0.00199601	0.0213908	0.035321	1	1	1	1.02956	3.31847	0.0247613	3.41657	0.0637502
32135	2126	ML	8103226	TMEM154: transmembrane protein 154		-3.62239	0.00199601	0.0213908	0.035321	1	1	1	1.02952	3.05467	0.0405382	3.14483	0.014677
32351	1707	ML	8043197	VAMP8: vesicle-associated membrane protein 8 (endobrevin)		-3.96953	0.00199601	0.0213908	0.035321	1	1	1	1.0295	3.429	0.00780833	3.53017	0.0434467
31644	3110	ML	8153069	ENST00000362782: ncrna:snRNA chromosome:GRCh37:8:136754586:136754738:-1 gene:ENSG00000199652 gene_biotype:snRNA transcript_biotype:snRNA		-3.09086	0.00199601	0.0213908	0.035321	1	1	1	1.02945	1.94337	0.0193707	2.0006	0.0255619
32141	2109	ML	7962358	YAF2: YY1 associated factor 2		-3.63435	0.00199601	0.0213908	0.035321	1	1	1	1.02933	2.7037	0.0102367	2.783	0.0363798
32491	1452	ML	7974912	ENST00000365620: ncrna:snRNA chromosome:GRCh37:14:64084761:64084862:1 gene:ENSG00000202490 gene_biotype:snRNA transcript_biotype:snRNA		-4.19093	0.00199601	0.0213908	0.035321	1	1	1	1.02933	1.87893	0.00763959	1.93403	0.0214524
31926	2554	ML	7951429	KBTBD3: kelch repeat and BTB (POZ) domain containing 3		-3.37101	0.00199601	0.0213908	0.035321	1	1	1	1.02928	2.52247	0.0203922	2.59633	0.0320094
32492	1451	ML	8089659	KIAA1407: KIAA1407		-4.19404	0.00199601	0.0213908	0.035321	1	1	1	1.02926	2.5314	0.0253527	2.60547	0.0171133
32780	925	ML	8097236	ADAD1: adenosine deaminase domain containing 1 (testis-specific)		-4.86974	0.00199601	0.0213908	0.035321	1	1	1	1.02907	2.04817	0.0140802	2.1077	0.0158149
32486	1473	ML	7957253	GLIPR1L2: GLI pathogenesis-related 1 like 2		-4.17303	0.00199601	0.0213908	0.035321	1	1	1	1.02903	2.05513	0.0214505	2.1148	0.012377
31198	4099	ML	8037459	ZNF285: zinc finger protein 285		-2.70908	0.00199601	0.0213908	0.035321	1	1	1	1.02891	2.70887	0.0469239	2.78717	0.0174431
29274	8752	ML	8046281	ENST00000410577: ncrna:misc_RNA chromosome:GRCh37:2:171639677:171639781:1 gene:ENSG00000222509 gene_biotype:misc_RNA transcript_biotype:misc_RNA		-1.7329	0.00199601	0.0213908	0.035321	1	1	1	1.02889	1.93623	0.0077242	1.99217	0.0553697
32835	814	ML	7902308	FPGT: fucose-1-phosphate guanylyltransferase		-5.09847	0.00199601	0.0213908	0.035321	1	1	1	1.02889	2.9725	0.00903493	3.05837	0.0277361
31610	3177	ML	8046012	RN5S109: RNA, 5S ribosomal 109		-3.05491	0.00199601	0.0213908	0.035321	1	1	1	1.02885	1.85197	0.0293844	1.9054	0.00737292
33043	415	ML	8092707	LEPREL1: leprecan-like 1		-6.31523	0.00199601	0.0213908	0.035321	1	1	1	1.02884	3.27313	0.00545558	3.36753	0.0253094
32146	2100	ML	8083447	P2RY1: purinergic receptor P2Y, G-protein coupled, 1		-3.63963	0.00199601	0.0213908	0.035321	1	1	1	1.02876	3.0426	0.0387609	3.1301	0.0152148
32339	1727	ML	8060850	BMP2: bone morphogenetic protein 2		-3.94796	0.00199601	0.0213908	0.035321	1	1	1	1.02872	2.92607	0.0291714	3.0101	0.0225435
32922	650	ML	8058091	SATB2: SATB homeobox 2		-5.50169	0.00199601	0.0213908	0.035321	1	1	1	1.02869	3.13813	0.010154	3.22817	0.0264632
32743	990	ML	7928342	NUDT13: nudix (nucleoside diphosphate linked moiety X)-type motif 13		-4.773	0.00199601	0.0213908	0.035321	1	1	1	1.02867	2.70923	0.00512868	2.7869	0.0277135
33109	306	ML	8022872	ZSCAN30: zinc finger and SCAN domain containing 30		-6.90364	0.00199601	0.0213908	0.035321	1	1	1	1.02865	2.8381	0.0185935	2.9194	0.0083863
31334	3782	ML	8103563	DDX60: DEAD (Asp-Glu-Ala-Asp) box polypeptide 60		-2.80878	0.00199601	0.0213908	0.035321	1	1	1	1.0286	2.8515	0.034533	2.93307	0.0365708
31951	2495	ML	7917240	CTBS: chitobiase, di-N-acetyl-		-3.39759	0.00199601	0.0213908	0.035321	1	1	1	1.02857	3.0308	0.0146079	3.1174	0.0416609
31946	2508	ML	8142687	GPR37: G protein-coupled receptor 37 (endothelin receptor type B-like)		-3.39197	0.00199601	0.0213908	0.035321	1	1	1	1.02855	3.0648	0.031683	3.1523	0.0315043
31792	2823	ML	7964631	FAM19A2: family with sequence similarity 19 (chemokine (C-C motif)-like), member A2		-3.21648	0.00199601	0.0213908	0.035321	1	1	1	1.02855	2.7696	0.0379889	2.84867	0.0192256
31875	2647	ML	8161892	GNA14: guanine nucleotide binding protein (G protein), alpha 14		-3.31378	0.00199601	0.0213908	0.035321	1	1	1	1.02849	3.2701	0.046679	3.36327	0.0138713
30981	4587	ML	7909561	LINC00467: long intergenic non-protein coding RNA 467		-2.56323	0.00199601	0.0213908	0.035321	1	1	1	1.02839	2.9388	0.0490976	3.02223	0.0277122
29785	7440	ML	8028963	CYP2B6: cytochrome P450, family 2, subfamily B, polypeptide 6		-1.92925	0.00199601	0.0213908	0.035321	1	1	1	1.02838	2.9234	0.0727822	3.00637	0.0158412
33127	277	ML	8066848	PREX1: phosphatidylinositol-3,4,5-trisphosphate-dependent Rac exchange factor 1		-7.10376	0.00199601	0.0213908	0.035321	1	1	1	1.02834	3.17627	0.00518588	3.26627	0.0213224
32012	2366	ML	8115397	C5orf4: chromosome 5 open reading frame 4		-3.47027	0.00199601	0.0213908	0.035321	1	1	1	1.02827	2.988	0.0403122	3.07247	0.0123391
30581	5548	ML	7971537	ENST00000494701: ncrna_pseudogene:snRNA_pseudogene chromosome:GRCh37:13:47531373:47531437:-1 gene:ENSG00000239385 gene_biotype:snRNA_pseudogene transcript_biotype:snRNA_pseudogene		-2.30751	0.00199601	0.0213908	0.035321	1	1	1	1.02825	2.4058	0.0480925	2.47377	0.0170242
31972	2440	ML	8084524	EPHB3: EPH receptor B3		-3.42597	0.00199601	0.0213908	0.035321	1	1	1	1.02825	2.87593	0.01175	2.95717	0.0393519
33231	124	ML	8082075	DTX3L: deltex 3-like (Drosophila)		-8.74262	0.00199601	0.0213908	0.035321	1	1	1	1.02818	2.98083	0.0152717	3.06483	0.00661236
32096	2212	ML	8046147	BBS5: Bardet-Biedl syndrome 5		-3.56657	0.00199601	0.0213908	0.035321	1	1	1	1.02808	2.66667	0.0317585	2.74153	0.0177001
32365	1685	ML	7992841	7992841: unannotated transcript: chr16:3132166-3132244		-3.98664	0.00199601	0.0213908	0.035321	1	1	1	1.02803	2.57923	0.0309613	2.65153	0.00530031
31748	2908	ML	7925450	ENST00000365171: ncrna:misc_RNA chromosome:GRCh37:1:240317951:240318072:-1 gene:ENSG00000202041 gene_biotype:misc_RNA transcript_biotype:misc_RNA		-3.18007	0.00199601	0.0213908	0.035321	1	1	1	1.02802	1.71653	0.0244238	1.76463	0.00947699
31764	2882	ML	8151633	PSKH2: protein serine kinase H2		-3.1929	0.00199601	0.0213908	0.035321	1	1	1	1.02801	2.7167	0.0211795	2.7928	0.0354349
30835	4931	ML	8091097	AK021889: Homo sapiens cDNA FLJ11827 fis, clone HEMBA1006502.		-2.46061	0.00199601	0.0213908	0.035321	1	1	1	1.028	2.2477	0.0361224	2.31063	0.025644
30504	5708	ML	8121814	NKAIN2: Na+/K+ transporting ATPase interacting 2		-2.26676	0.00199601	0.0213908	0.035321	1	1	1	1.02794	2.5577	0.00979234	2.62917	0.053723
32381	1658	ML	8058118	KCTD18: potassium channel tetramerisation domain containing 18		-4.00986	0.00199601	0.0213908	0.035321	1	1	1	1.02791	2.9223	0.0177536	3.00387	0.0304326
31910	2585	ML	7979658	GPX2: glutathione peroxidase 2 (gastrointestinal)		-3.3514	0.00199601	0.0213908	0.035321	1	1	1	1.02785	2.7779	0.0210516	2.85527	0.0339936
32217	1960	ML	8052438	LOC339803: uncharacterized LOC339803		-3.74999	0.00199601	0.0213908	0.035321	1	1	1	1.02785	3.0034	0.0105655	3.08703	0.0371557
30699	5258	ML	8124158	ENST00000363811: ncrna:snRNA chromosome:GRCh37:6:18307204:18307310:-1 gene:ENSG00000200681 gene_biotype:snRNA transcript_biotype:snRNA		-2.37692	0.00199601	0.0213908	0.035321	1	1	1	1.02782	1.93853	0.00221886	1.99247	0.0392383
32286	1836	ML	7893717	7893717: unannotated transcript: ---:-------		-3.85104	0.00199601	0.0213908	0.035321	1	1	1	1.02779	2.96293	0.0269277	3.04527	0.0254193
32472	1504	ML	7894497	7894497: unannotated transcript: ---:-------		-4.14344	0.00199601	0.0213908	0.035321	1	1	1	1.02777	2.7044	0.00841843	2.7795	0.0302437
31703	2999	ML	8144705	KIAA1456: KIAA1456		-3.14139	0.00199601	0.0213908	0.035321	1	1	1	1.02775	2.8453	0.0062	2.92427	0.0430957
32510	1419	ML	8097670	MMAA: methylmalonic aciduria (cobalamin deficiency) cblA type		-4.21641	0.00199601	0.0213908	0.035321	1	1	1	1.02772	2.89913	0.0317328	2.9795	0.00910659
31431	3559	ML	7968056	TPTE2P6: transmembrane phosphoinositide 3-phosphatase and tensin homolog 2 pseudogene 6		-2.8946	0.00199601	0.0213908	0.035321	1	1	1	1.02771	2.63057	0.0402201	2.70347	0.0168871
31752	2903	ML	8105111	FBXO4: F-box protein 4		-3.1832	0.00199601	0.0213908	0.035321	1	1	1	1.02769	2.7281	0.0259137	2.80363	0.0319005
29856	7296	ML	8041445	ENST00000384525: ncrna:snRNA chromosome:GRCh37:2:35696671:35696774:1 gene:ENSG00000207255 gene_biotype:snRNA transcript_biotype:snRNA		-1.95495	0.00199601	0.0213908	0.035321	1	1	1	1.02766	1.71497	0.0295977	1.7624	0.0298342
31986	2413	ML	8095819	FAM47E-STBD1: FAM47E-STBD1 readthrough		-3.44055	0.00199601	0.0213908	0.035321	1	1	1	1.02765	2.6375	0.0285851	2.71043	0.0230429
31264	3939	ML	8056983	LOC100130691: uncharacterized LOC100130691		-2.75824	0.00199601	0.0213908	0.035321	1	1	1	1.02755	2.74607	0.0384986	2.82173	0.0278489
32534	1375	ML	8023375	ENST00000462220: ncrna_pseudogene:scRNA_pseudogene chromosome:GRCh37:18:48633122:48633416:-1 gene:ENSG00000240820 gene_biotype:scRNA_pseudogene transcript_biotype:scRNA_pseudogene		-4.25872	0.00199601	0.0213908	0.035321	1	1	1	1.02755	2.35187	0.00953432	2.41667	0.0245696
32206	1977	ML	7957954	ENST00000410958: ncrna:snRNA chromosome:GRCh37:12:101805135:101805237:1 gene:ENSG00000222890 gene_biotype:snRNA transcript_biotype:snRNA		-3.73357	0.00199601	0.0213908	0.035321	1	1	1	1.02754	1.82503	0.00955004	1.8753	0.0212742
32865	762	ML	8089203	SENP7: SUMO1/sentrin specific peptidase 7		-5.18501	0.00199601	0.0213908	0.035321	1	1	1	1.02751	2.89357	0.014678	2.97317	0.0221721
32702	1082	ML	8113512	EPB41L4A: erythrocyte membrane protein band 4.1 like 4A		-4.63676	0.00199601	0.0213908	0.035321	1	1	1	1.02746	2.9972	0.020103	3.0795	0.0232594
30667	5322	ML	7997700	7997700: unannotated transcript: chr16:85692984-85693281		-2.36045	0.00199601	0.0213908	0.035321	1	1	1	1.02746	2.65867	0.022566	2.73167	0.0485808
32396	1641	ML	8056730	LOC440925: uncharacterized LOC440925		-4.02537	0.00199601	0.0213908	0.035321	1	1	1	1.02745	2.70673	0.0245875	2.78103	0.0204339
30396	5970	ML	7922807	GLT25D2: glycosyltransferase 25 domain containing 2		-2.21128	0.00199601	0.0213908	0.035321	1	1	1	1.02741	2.8325	0.0505226	2.91013	0.03384
31950	2496	ML	8121142	ENST00000516440: ncrna:snoRNA chromosome:GRCh37:6:94588824:94588947:1 gene:ENSG00000252249 gene_biotype:snoRNA transcript_biotype:snoRNA		-3.39713	0.00199601	0.0213908	0.035321	1	1	1	1.02738	2.35657	0.018791	2.4211	0.0270091
32959	581	ML	8117458	BTN3A1: butyrophilin, subfamily 3, member A1		-5.68832	0.00199601	0.0213908	0.035321	1	1	1	1.02736	2.99553	0.0221996	3.0775	0.0114057
31568	3262	ML	8147057	CHMP4C: charged multivesicular body protein 4C		-3.01816	0.00199601	0.0213908	0.035321	1	1	1	1.02734	3.05003	0.0280036	3.13343	0.0388136
33265	65	ML	8059642	SLC16A14: solute carrier family 16, member 14 (monocarboxylic acid transporter 14)		-9.93452	0.00199601	0.0213908	0.035321	1	1	1	1.02729	2.87127	0.0069407	2.94963	0.0117687
32551	1343	ML	8105778	PIK3R1: phosphoinositide-3-kinase, regulatory subunit 1 (alpha)		-4.29255	0.00199601	0.0213908	0.035321	1	1	1	1.02726	3.2267	0.0317888	3.31467	0.0157906
31659	3084	ML	7948332	LPXN: leupaxin		-3.10236	0.00199601	0.0213908	0.035321	1	1	1	1.02723	2.8918	0.0369014	2.97053	0.0238852
31406	3616	ML	7983771	ENST00000384268: ncrna:misc_RNA chromosome:GRCh37:15:52454948:52455049:1 gene:ENSG00000206995 gene_biotype:misc_RNA transcript_biotype:misc_RNA		-2.87165	0.00199601	0.0213908	0.035321	1	1	1	1.0272	2.52327	0.0312266	2.5919	0.0271766
31453	3503	ML	8030944	ZNF578: zinc finger protein 578		-2.91207	0.00199601	0.0213908	0.035321	1	1	1	1.02719	2.63847	0.036323	2.7102	0.0223833
32544	1358	ML	8092523	EHHADH: enoyl-CoA, hydratase/3-hydroxyacyl CoA dehydrogenase		-4.27551	0.00199601	0.0213908	0.035321	1	1	1	1.02718	2.9287	0.0276572	3.0083	0.016581
32572	1300	ML	8151512	PAG1: phosphoprotein associated with glycosphingolipid microdomains 1		-4.34723	0.00199601	0.0213908	0.035321	1	1	1	1.02716	2.56023	0.00842991	2.62977	0.0263902
33161	220	ML	8180374	NM_001006666.1: Homo sapiens apolipoprotein B mRNA editing enzyme, catalytic polypeptide-like 3F (APOBEC3F), transcript variant 2, mRNA		-7.64065	0.00199601	0.0213908	0.035321	1	1	1	1.02716	3.07333	0.0151715	3.1568	0.0113062
31067	4393	ML	8097753	DCLK2: doublecortin-like kinase 2		-2.62194	0.00199601	0.0213908	0.035321	1	1	1	1.02708	2.6832	0.0374237	2.75587	0.0300633
30618	5448	ML	8111922	LOC648987: uncharacterized LOC648987		-2.33011	0.00199601	0.0213908	0.035321	1	1	1	1.02708	2.53727	0.00638462	2.60597	0.0506665
31279	3913	ML	8166028	FRMPD4: FERM and PDZ domain containing 4		-2.7656	0.00199601	0.0213908	0.035321	1	1	1	1.02707	2.4564	0.0397576	2.5229	0.0124048
32399	1636	ML	8052233	C2orf63: chromosome 2 open reading frame 63		-4.0277	0.00199601	0.0213908	0.035321	1	1	1	1.02706	2.73477	0.00771125	2.80877	0.0308742
31408	3610	ML	7920664	THBS3: thrombospondin 3		-2.87378	0.00199601	0.0213908	0.035321	1	1	1	1.02703	2.84827	0.0258614	2.92527	0.038535
32391	1646	ML	7977615	RNASE1: ribonuclease, RNase A family, 1 (pancreatic)		-4.01827	0.00199601	0.0213908	0.035321	1	1	1	1.02703	3.06627	0.0151912	3.14913	0.0323277
29554	8035	ML	7896336	7896336: unannotated transcript: ---:-------		-1.83672	0.00199601	0.0213908	0.035321	1	1	1	1.027	2.90747	0.0729869	2.98597	0.0123618
31474	3462	ML	7923700	LRRN2: leucine rich repeat neuronal 2		-2.93392	0.00199601	0.0213908	0.035321	1	1	1	1.02698	3.0234	0.0316365	3.10497	0.0363022
32785	917	ML	7942520	LOC100287896: uncharacterized LOC100287896		-4.88311	0.00199601	0.0213908	0.035321	1	1	1	1.02686	2.84643	0.0253741	2.9229	0.00958175
33050	405	ML	8124040	ATXN1: ataxin 1		-6.35571	0.00199601	0.0213908	0.035321	1	1	1	1.02676	2.94373	0.00561456	3.0225	0.0207181
29051	9274	ML	8025990	RN5S466: RNA, 5S ribosomal 466		-1.66606	0.00199601	0.0213908	0.035321	1	1	1	1.02674	1.78603	0.0389225	1.8338	0.0308385
31418	3582	ML	7893597	7893597: unannotated transcript: ---:-------		-2.88588	0.00199601	0.0213908	0.035321	1	1	1	1.02672	1.75393	0.0250259	1.8008	0.0128421
30948	4665	ML	8108287	WNT8A: wingless-type MMTV integration site family, member 8A		-2.54177	0.00199601	0.0213908	0.035321	1	1	1	1.02668	2.79903	0.0141642	2.8737	0.0488691
30904	4765	ML	7894244	7894244: unannotated transcript: ---:-------		-2.5067	0.00199601	0.0213908	0.035321	1	1	1	1.02663	2.6871	0.00531131	2.75867	0.0491642
31624	3147	ML	8102936	ENST00000384426: ncrna:misc_RNA chromosome:GRCh37:4:141621989:141622096:-1 gene:ENSG00000207155 gene_biotype:misc_RNA transcript_biotype:misc_RNA		-3.07067	0.00199601	0.0213908	0.035321	1	1	1	1.02663	2.0239	0.0248079	2.0778	0.0175758
31797	2809	ML	8055200	ENST00000494038: ncrna_pseudogene:Mt_tRNA_pseudogene chromosome:GRCh37:2:131031229:131031301:-1 gene:ENSG00000240331 gene_biotype:Mt_tRNA_pseudogene transcript_biotype:Mt_tRNA_pseudogene		-3.22879	0.00199601	0.0213908	0.035321	1	1	1	1.02662	1.66933	0.0160594	1.71377	0.0176137
30788	5039	ML	8141148	ENST00000362605: ncrna:misc_RNA chromosome:GRCh37:7:97228245:97228572:-1 gene:ENSG00000199475 gene_biotype:misc_RNA transcript_biotype:misc_RNA		-2.42827	0.00199601	0.0213908	0.035321	1	1	1	1.02661	2.13047	0.021336	2.18717	0.0343576
31737	2931	ML	7894467	7894467: unannotated transcript: ---:-------		-3.16768	0.00199601	0.0213908	0.035321	1	1	1	1.02661	2.9498	0.0403082	3.0283	0.0147523
31702	3002	ML	7904211	VANGL1: vang-like 1 (van gogh, Drosophila)		-3.14037	0.00199601	0.0213908	0.035321	1	1	1	1.02657	3.12787	0.0126698	3.21097	0.0440473
31895	2619	ML	8167441	ENST00000384209: ncrna:snRNA chromosome:GRCh37:X:48939686:48939823:1 gene:ENSG00000206936 gene_biotype:snRNA transcript_biotype:snRNA		-3.3284	0.00199601	0.0213908	0.035321	1	1	1	1.02652	2.5904	0.0304596	2.6591	0.0187166
30523	5662	ML	7981106	GSC: goosecoid homeobox		-2.27998	0.00199601	0.0213908	0.035321	1	1	1	1.02652	2.98523	0.00722657	3.0644	0.0597055
33225	132	ML	7951781	C11orf71: chromosome 11 open reading frame 71		-8.60375	0.00199601	0.0213908	0.035321	1	1	1	1.0265	2.98287	0.0110934	3.0619	0.0114053
32420	1606	ML	7893118	7893118: unannotated transcript: ---:-------		-4.04762	0.00199601	0.0213908	0.035321	1	1	1	1.02646	3.03383	0.0277821	3.1141	0.0201968
30704	5247	ML	7957417	TMTC2: transmembrane and tetratricopeptide repeat containing 2		-2.37839	0.00199601	0.0213908	0.035321	1	1	1	1.0264	2.9281	0.0371735	3.0054	0.0422739
31183	4133	ML	8069122	LRRC3: leucine rich repeat containing 3		-2.69783	0.00199601	0.0213908	0.035321	1	1	1	1.02639	3.0727	0.0121008	3.1538	0.0506418
32976	552	ML	8112342	ADAMTS6: ADAM metallopeptidase with thrombospondin type 1 motif, 6		-5.80249	0.00199601	0.0213908	0.035321	1	1	1	1.02636	2.71293	0.0175221	2.78443	0.0121858
30078	6783	ML	8084000	RN5S147: RNA, 5S ribosomal 147		-2.04276	0.00199601	0.0213908	0.035321	1	1	1	1.02635	1.8429	0.0378533	1.89147	0.016214
31220	4053	ML	8134252	GNGT1: guanine nucleotide binding protein (G protein), gamma transducing activity polypeptide 1		-2.72021	0.00199601	0.0213908	0.035321	1	1	1	1.02613	1.9074	0.00950631	1.95723	0.0302731
32466	1517	ML	8152041	RNF19A: ring finger protein 19A, E3 ubiquitin protein ligase		-4.1365	0.00199601	0.0213908	0.035321	1	1	1	1.02612	3.1865	0.0062482	3.26973	0.0342871
32672	1126	ML	8113551	MCC: mutated in colorectal cancers		-4.5756	0.00199601	0.0213908	0.035321	1	1	1	1.02607	3.14043	0.0213346	3.2223	0.0224769
29248	8811	ML	8007902	RNU6ATAC3P: RNA, U6atac small nuclear 3, pseudogene		-1.72453	0.00199601	0.0213908	0.035321	1	1	1	1.02604	2.17463	0.0507868	2.23127	0.0256137
30613	5459	ML	8090676	ENST00000491372: ncrna_pseudogene:rRNA_pseudogene chromosome:GRCh37:3:131136688:131136846:-1 gene:ENSG00000244592 gene_biotype:rRNA_pseudogene transcript_biotype:rRNA_pseudogene		-2.32841	0.00199601	0.0213908	0.035321	1	1	1	1.02603	2.45123	0.0473006	2.51503	0.00387857
31729	2951	ML	8059376	SERPINE2: serpin peptidase inhibitor, clade E (nexin, plasminogen activator inhibitor type 1), member 2		-3.15907	0.00199601	0.0213908	0.035321	1	1	1	1.02601	3.43047	0.0129001	3.5197	0.0471933
31629	3136	ML	8095380	TMPRSS11E: transmembrane protease, serine 11E		-3.07693	0.00199601	0.0213908	0.035321	1	1	1	1.02599	3.00343	0.0174821	3.0815	0.0403179
31867	2664	ML	8106411	S100Z: S100 calcium binding protein Z		-3.30511	0.00199601	0.0213908	0.035321	1	1	1	1.02598	2.5671	0.0182008	2.6338	0.0298417
30643	5382	ML	7909789	TGFB2: transforming growth factor, beta 2		-2.3468	0.00199601	0.0213908	0.035321	1	1	1	1.02584	2.8972	0.0437685	2.97207	0.0337262
32542	1361	ML	7922707	RNASEL: ribonuclease L (2',5'-oligoisoadenylate synthetase-dependent)		-4.2717	0.00199601	0.0213908	0.035321	1	1	1	1.02583	2.65153	0.0164199	2.72003	0.0224014
31340	3768	ML	7929822	WNT8B: wingless-type MMTV integration site family, member 8B		-2.81247	0.00199601	0.0213908	0.035321	1	1	1	1.02581	2.85697	0.0279565	2.9307	0.0357823
29845	7319	ML	7975406	ADAM21: ADAM metallopeptidase domain 21		-1.95078	0.00199601	0.0213908	0.035321	1	1	1	1.02577	2.26723	0.0260277	2.32567	0.0448804
32423	1596	ML	7904843	PDZK1: PDZ domain containing 1		-4.05533	0.00199601	0.0213908	0.035321	1	1	1	1.02575	2.39477	0.0164734	2.45643	0.0205505
32088	2224	ML	7972713	EFNB2: ephrin-B2		-3.55794	0.00199601	0.0213908	0.035321	1	1	1	1.02573	3.1923	0.018985	3.27443	0.0351888
33185	188	ML	8004266	SLC16A13: solute carrier family 16, member 13 (monocarboxylic acid transporter 13)		-7.89191	0.00199601	0.0213908	0.035321	1	1	1	1.02573	3.17047	0.00502029	3.25203	0.0171832
31666	3072	ML	8095364	TMPRSS11E: transmembrane protease, serine 11E		-3.1102	0.00199601	0.0213908	0.035321	1	1	1	1.02571	3.00117	0.0153832	3.07833	0.040126
32991	511	ML	7932177	CDNF: cerebral dopamine neurotrophic factor		-5.96428	0.00199601	0.0213908	0.035321	1	1	1	1.02571	2.724	0.012175	2.79403	0.0162912
33284	19	ML	8139021	KIAA0895: KIAA0895		-13.2777	0.00199601	0.0213908	0.035321	1	1	1	1.02567	2.875	0.00802932	2.9488	0.00531131
31379	3684	ML	8116906	ENST00000469955: ncrna_pseudogene:scRNA_pseudogene chromosome:GRCh37:6:11644300:11644576:1 gene:ENSG00000244357 gene_biotype:scRNA_pseudogene transcript_biotype:scRNA_pseudogene		-2.84362	0.00199601	0.0213908	0.035321	1	1	1	1.02559	1.88103	0.0132259	1.92917	0.0261653
31602	3201	ML	7926543	ENST00000470405: ncrna_pseudogene:Mt_tRNA_pseudogene chromosome:GRCh37:10:20036683:20036750:1 gene:ENSG00000243163 gene_biotype:Mt_tRNA_pseudogene transcript_biotype:Mt_tRNA_pseudogene		-3.04478	0.00199601	0.0213908	0.035321	1	1	1	1.02552	2.4154	0.0287077	2.47703	0.0201277
31135	4236	ML	7962345	ENST00000491742: ncrna_pseudogene:Mt_tRNA_pseudogene chromosome:GRCh37:12:42092985:42093054:-1 gene:ENSG00000242584 gene_biotype:Mt_tRNA_pseudogene transcript_biotype:Mt_tRNA_pseudogene		-2.67065	0.00199601	0.0213908	0.035321	1	1	1	1.02548	1.89303	0.023718	1.94127	0.0203962
31859	2674	ML	7969438	LMO7: LIM domain 7		-3.30095	0.00199601	0.0213908	0.035321	1	1	1	1.02548	2.90833	0.0107565	2.98243	0.0373637
31365	3714	ML	8145566	ENST00000410930: ncrna:snRNA chromosome:GRCh37:8:27537349:27537452:1 gene:ENSG00000222862 gene_biotype:snRNA transcript_biotype:snRNA		-2.83275	0.00199601	0.0213908	0.035321	1	1	1	1.02548	2.17577	0.0338604	2.2312	0.00150997
32041	2300	ML	8023727	DSEL: dermatan sulfate epimerase-like		-3.51069	0.00199601	0.0213908	0.035321	1	1	1	1.02547	3.26727	0.0209151	3.3505	0.0353389
32807	875	ML	8108724	PCDHB10: protocadherin beta 10		-4.97561	0.00199601	0.0213908	0.035321	1	1	1	1.0254	2.8999	0.0222933	2.97357	0.0126737
33187	183	ML	7946354	LMO1: LIM domain only 1 (rhombotin 1)		-7.91001	0.00199601	0.0213908	0.035321	1	1	1	1.02537	2.95177	0.00658964	3.02667	0.0150188
32881	729	ML	8053349	LRRTM1: leucine rich repeat transmembrane neuronal 1		-5.2589	0.00199601	0.0213908	0.035321	1	1	1	1.02527	2.91037	0.0143587	2.9839	0.0195031
33032	433	ML	8122879	ENST00000479316: ncrna_pseudogene:Mt_tRNA_pseudogene chromosome:GRCh37:6:153987532:153987599:1 gene:ENSG00000240136 gene_biotype:Mt_tRNA_pseudogene transcript_biotype:Mt_tRNA_pseudogene		-6.24304	0.00199601	0.0213908	0.035321	1	1	1	1.02522	1.88343	0.0110192	1.93093	0.00722795
32707	1070	ML	7931403	ENST00000411065: ncrna:misc_RNA chromosome:GRCh37:10:132303370:132303465:1 gene:ENSG00000222997 gene_biotype:misc_RNA transcript_biotype:misc_RNA		-4.65745	0.00199601	0.0213908	0.035321	1	1	1	1.02509	2.20143	0.00972077	2.25667	0.0180948
32151	2094	ML	8014230	SLC35G3: solute carrier family 35, member G3		-3.64501	0.00199601	0.0213908	0.035321	1	1	1	1.02508	2.80187	0.0196505	2.87213	0.0269949
32425	1593	ML	7926708	THNSL1: threonine synthase-like 1 (S. cerevisiae)		-4.05973	0.00199601	0.0213908	0.035321	1	1	1	1.02505	2.9478	0.0297914	3.02163	0.0102344
32276	1857	ML	8066025	ENST00000410220: ncrna:snRNA chromosome:GRCh37:20:34357707:34357789:-1 gene:ENSG00000222152 gene_biotype:snRNA transcript_biotype:snRNA		-3.82905	0.00199601	0.0213908	0.035321	1	1	1	1.02503	2.14927	0.0192905	2.20307	0.0148366
32692	1097	ML	8058765	FN1: fibronectin 1		-4.61383	0.00199601	0.0213908	0.035321	1	1	1	1.02501	3.46863	0.00225019	3.5554	0.0324948
30209	6438	ML	7903530	FNDC7: fibronectin type III domain containing 7		-2.10728	0.00199601	0.0213908	0.035321	1	1	1	1.02497	2.4775	0.0208144	2.53937	0.0463953
30714	5225	ML	7927723	C10orf107: chromosome 10 open reading frame 107		-2.38429	0.00199601	0.0213908	0.035321	1	1	1	1.02497	1.82893	0.0298855	1.8746	0.014401
32411	1622	ML	7929388	PLCE1: phospholipase C, epsilon 1		-4.03521	0.00199601	0.0213908	0.035321	1	1	1	1.0249	2.5868	0.0233283	2.6512	0.0148294
31059	4410	ML	7910903	ENST00000465973: ncrna_pseudogene:Mt_tRNA_pseudogene chromosome:GRCh37:1:238104374:238104439:1 gene:ENSG00000240741 gene_biotype:Mt_tRNA_pseudogene transcript_biotype:Mt_tRNA_pseudogene		-2.61843	0.00199601	0.0213908	0.035321	1	1	1	1.02489	1.68863	0.0155423	1.73067	0.0230548
32236	1917	ML	8146462	SOX17: SRY (sex determining region Y)-box 17		-3.77301	0.00199601	0.0213908	0.035321	1	1	1	1.02486	3.04327	0.0155671	3.11893	0.0310523
31538	3311	ML	8076025	PLA2G6: phospholipase A2, group VI (cytosolic, calcium-independent)		-2.99692	0.00199601	0.0213908	0.035321	1	1	1	1.02483	3.0235	0.0414877	3.09857	0.0126871
29408	8439	ML	8113097	KIAA0825: KIAA0825		-1.77959	0.00199601	0.0213908	0.035321	1	1	1	1.02478	2.61197	0.0599093	2.6767	0.0195031
30628	5429	ML	8154758	ENST00000462879: ncrna_pseudogene:rRNA_pseudogene chromosome:GRCh37:9:32537939:32538175:1 gene:ENSG00000243093 gene_biotype:rRNA_pseudogene transcript_biotype:rRNA_pseudogene		-2.33403	0.00199601	0.0213908	0.035321	1	1	1	1.02477	2.2731	0.0319952	2.3294	0.0268669
31149	4200	ML	8047401	CFLAR: CASP8 and FADD-like apoptosis regulator		-2.6823	0.00199601	0.0213908	0.035321	1	1	1	1.02476	2.72907	0.031504	2.79663	0.0301842
30857	4889	ML	8151238	ENST00000478498: ncrna_pseudogene:scRNA_pseudogene chromosome:GRCh37:8:70834986:70835278:-1 gene:ENSG00000239580 gene_biotype:scRNA_pseudogene transcript_biotype:scRNA_pseudogene		-2.4714	0.00199601	0.0213908	0.035321	1	1	1	1.02473	2.5405	0.0302752	2.60333	0.0319779
31419	3580	ML	7896718	7896718: unannotated transcript: ---:-------		-2.88738	0.00199601	0.0213908	0.035321	1	1	1	1.0246	2.30643	0.00549303	2.36317	0.0335864
33010	477	ML	8078300	OXSM: 3-oxoacyl-ACP synthase, mitochondrial		-6.05805	0.00199601	0.0213908	0.035321	1	1	1	1.0246	2.82303	0.0120442	2.89247	0.0157805
31711	2981	ML	7993179	ENST00000362612: ncrna:snRNA chromosome:GRCh37:16:10590129:10590231:1 gene:ENSG00000199482 gene_biotype:snRNA transcript_biotype:snRNA		-3.1462	0.00199601	0.0213908	0.035321	1	1	1	1.02459	1.85547	0.00961267	1.9011	0.0232103
31479	3452	ML	7905698	ENST00000460226: ncrna_pseudogene:snoRNA_pseudogene chromosome:GRCh37:1:154089440:154089513:1 gene:ENSG00000242446 gene_biotype:snoRNA_pseudogene transcript_biotype:snoRNA_pseudogene		-2.93585	0.00199601	0.0213908	0.035321	1	1	1	1.0245	1.81627	0.0130615	1.86077	0.0227737
32599	1244	ML	7968062	ATP12A: ATPase, H+/K+ transporting, nongastric, alpha polypeptide		-4.42366	0.00199601	0.0213908	0.035321	1	1	1	1.02445	2.93283	0.027171	3.00453	0.0070614
29424	8397	ML	8127903	KIAA1009: KIAA1009		-1.78582	0.00199601	0.0213908	0.035321	1	1	1	1.02443	2.8174	0.0645026	2.88623	0.0172175
29940	7113	ML	8140840	STEAP4: STEAP family member 4		-1.98468	0.00199601	0.0213908	0.035321	1	1	1	1.02443	2.16307	0.0322348	2.2159	0.0329679
31106	4302	ML	8094596	PTTG2: pituitary tumor-transforming 2		-2.64902	0.00199601	0.0213908	0.035321	1	1	1	1.02442	1.93307	0.0271039	1.98027	0.0147585
30370	6021	ML	7957433	LRRIQ1: leucine-rich repeats and IQ motif containing 1		-2.20199	0.00199601	0.0213908	0.035321	1	1	1	1.02438	2.4295	0.0407714	2.48873	0.02255
31343	3752	ML	7948667	AHNAK: AHNAK nucleoprotein		-2.81812	0.00199601	0.0213908	0.035321	1	1	1	1.02435	2.9978	0.0369314	3.0708	0.0254772
30073	6799	ML	7984985	7984985: unannotated transcript: chr15:75582781-75583677		-2.03983	0.00199601	0.0213908	0.035321	1	1	1	1.02431	2.83247	0.0506467	2.90133	0.0292292
31237	4003	ML	8074789	ENST00000496490: ncrna_pseudogene:scRNA_pseudogene chromosome:GRCh37:22:22077190:22077451:-1 gene:ENSG00000244671 gene_biotype:scRNA_pseudogene transcript_biotype:scRNA_pseudogene		-2.73645	0.00199601	0.0213908	0.035321	1	1	1	1.02427	2.91533	0.0293722	2.9861	0.0338173
30472	5786	ML	8134550	8134550: unannotated transcript: chr7:98840302-98840411		-2.25107	0.00199601	0.0213908	0.035321	1	1	1	1.02426	2.5117	0.0460205	2.57263	0.00895786
31704	2998	ML	8105731	FLJ46010: FLJ46010 protein		-3.1425	0.00199601	0.0213908	0.035321	1	1	1	1.02419	2.3313	0.0135503	2.3877	0.0279773
32237	1916	ML	8044584	PSD4: pleckstrin and Sec7 domain containing 4		-3.7752	0.00199601	0.0213908	0.035321	1	1	1	1.02419	2.78523	0.029248	2.8526	0.009992
30249	6311	ML	8100523	SPINK2: serine peptidase inhibitor, Kazal type 2 (acrosin-trypsin inhibitor)		-2.13469	0.00199601	0.0213908	0.035321	1	1	1	1.02416	2.61017	0.0448974	2.67323	0.0245504
31232	4015	ML	8144643	GATA4: GATA binding protein 4		-2.7322	0.00199601	0.0213908	0.035321	1	1	1	1.02404	2.997	0.0203536	3.06903	0.0408779
32965	569	ML	8012896	PMP22: peripheral myelin protein 22		-5.73905	0.00199601	0.0213908	0.035321	1	1	1	1.02404	3.04	0.00796053	3.11307	0.0205646
33238	110	ML	8082086	PARP15: poly (ADP-ribose) polymerase family, member 15		-8.90815	0.00199601	0.0213908	0.035321	1	1	1	1.02399	2.26107	0.00623084	2.3153	0.00850706
32755	972	ML	7938100	SMPD1: sphingomyelin phosphodiesterase 1, acid lysosomal		-4.80808	0.00199601	0.0213908	0.035321	1	1	1	1.02398	2.96973	0.00909414	3.04093	0.0239826
29879	7252	ML	7916783	7916783: unannotated transcript: chr1:66560091-66560229		-1.9638	0.00199601	0.0213908	0.035321	1	1	1	1.02396	1.87783	0.0114054	1.92283	0.0380154
31071	4385	ML	8139784	ENST00000478950: ncrna_pseudogene:Mt_tRNA_pseudogene chromosome:GRCh37:7:57255304:57255376:-1 gene:ENSG00000243522 gene_biotype:Mt_tRNA_pseudogene transcript_biotype:Mt_tRNA_pseudogene		-2.62446	0.00199601	0.0213908	0.035321	1	1	1	1.02385	1.86433	0.0285106	1.9088	0.00695414
30394	5975	ML	8089011	PROS1: protein S (alpha)		-2.21068	0.00199601	0.0213908	0.035321	1	1	1	1.02385	2.71893	0.0201609	2.78377	0.0466243
33054	399	ML	7965060	BBS10: Bardet-Biedl syndrome 10		-6.37875	0.00199601	0.0213908	0.035321	1	1	1	1.02383	3.0807	0.0184258	3.1541	0.00759737
29530	8107	ML	8052054	ENST00000516080: ncrna:snRNA chromosome:GRCh37:2:48567826:48567965:-1 gene:ENSG00000251889 gene_biotype:snRNA transcript_biotype:snRNA		-1.82766	0.00199601	0.0213908	0.035321	1	1	1	1.02373	1.94563	0.0147399	1.9918	0.0411938
30758	5118	ML	7961285	TAS2R20: taste receptor, type 2, member 20		-2.41045	0.00199601	0.0213908	0.035321	1	1	1	1.02365	2.8203	0.0131343	2.887	0.0460931
33254	84	ML	8069511	ANKRD20A11P: ankyrin repeat domain 20 family, member A11, pseudogene		-9.48131	0.00199601	0.0213908	0.035321	1	1	1	1.02364	2.7113	0.00463573	2.7754	0.0107531
32357	1695	ML	8142098	ATXN7L1: ataxin 7-like 1		-3.97814	0.00199601	0.0213908	0.035321	1	1	1	1.02357	3.23797	0.0329462	3.3143	0.0043715
30611	5465	ML	7895176	7895176: unannotated transcript: ---:-------		-2.32683	0.00199601	0.0213908	0.035321	1	1	1	1.02351	2.8116	0.0373774	2.8777	0.0319989
31518	3355	ML	7922293	ENST00000383965: ncrna:misc_RNA chromosome:GRCh37:1:171223045:171223161:-1 gene:ENSG00000206692 gene_biotype:misc_RNA transcript_biotype:misc_RNA		-2.97906	0.00199601	0.0213908	0.035321	1	1	1	1.02349	1.76357	0.0200331	1.805	0.0133787
32168	2066	ML	7943314	JRKL: jerky homolog-like (mouse)		-3.66284	0.00199601	0.0213908	0.035321	1	1	1	1.02348	2.88357	0.0230723	2.95127	0.0221929
31584	3232	ML	8069744	RWDD2B: RWD domain containing 2B		-3.02946	0.00199601	0.0213908	0.035321	1	1	1	1.02347	2.9884	0.0377437	3.05853	0.0135367
31827	2733	ML	7930454	PDCD4: programmed cell death 4 (neoplastic transformation inhibitor)		-3.26735	0.00199601	0.0213908	0.035321	1	1	1	1.02339	3.12843	0.0371045	3.2016	0.0112973
29162	9021	ML	8168463	FGF16: fibroblast growth factor 16		-1.69659	0.00199601	0.0213908	0.035321	1	1	1	1.02335	2.8684	0.060261	2.93537	0.0322889
33039	421	ML	7977511	TEP1: telomerase-associated protein 1		-6.29681	0.00199601	0.0213908	0.035321	1	1	1	1.02334	3.08653	0.00774683	3.15857	0.0182369
31762	2885	ML	8112672	ANKRD31: ankyrin repeat domain 31		-3.19187	0.00199601	0.0213908	0.035321	1	1	1	1.02331	2.31677	0.0280659	2.37077	0.00842397
32958	586	ML	7984662	GOLGA6A: golgin A6 family, member A		-5.67707	0.00199601	0.0213908	0.035321	1	1	1	1.02328	2.85357	0.0118989	2.92	0.0164082
31715	2972	ML	8177269	ERVH-6: endogenous retrovirus group H, member 6		-3.14896	0.00199601	0.0213908	0.035321	1	1	1	1.02328	2.76537	0.0240768	2.82973	0.025957
31041	4456	ML	8014591	HNF1B: HNF1 homeobox B		-2.60476	0.00199601	0.0213908	0.035321	1	1	1	1.02326	2.6349	0.0254159	2.6962	0.0318679
30555	5600	ML	8123678	PXDC1: PX domain containing 1		-2.29635	0.00199601	0.0213908	0.035321	1	1	1	1.02324	2.9696	0.0262738	3.0386	0.0449253
31678	3050	ML	8028770	ZNF546: zinc finger protein 546		-3.12176	0.00199601	0.0213908	0.035321	1	1	1	1.02323	2.25537	0.0162543	2.30777	0.0241048
29335	8614	ML	7932407	ST8SIA6: ST8 alpha-N-acetyl-neuraminide alpha-2,8-sialyltransferase 6		-1.75179	0.00199601	0.0213908	0.035321	1	1	1	1.02317	2.77073	0.0570318	2.83493	0.0278685
31819	2749	ML	7974109	LRFN5: leucine rich repeat and fibronectin type III domain containing 5		-3.25937	0.00199601	0.0213908	0.035321	1	1	1	1.02315	2.85	0.024187	2.91597	0.0253743
31462	3485	ML	7907893	MR1: major histocompatibility complex, class I-related		-2.91958	0.00199601	0.0213908	0.035321	1	1	1	1.02312	2.54597	0.0213613	2.60483	0.0276279
32591	1263	ML	8120067	SLC25A27: solute carrier family 25, member 27		-4.40082	0.00199601	0.0213908	0.035321	1	1	1	1.02311	2.948	0.026552	3.01613	0.00375011
31963	2463	ML	8025868	CCDC159: coiled-coil domain containing 159		-3.41447	0.00199601	0.0213908	0.035321	1	1	1	1.02298	2.74153	0.0267276	2.80453	0.0175198
32578	1288	ML	8143534	KEL: Kell blood group, metallo-endopeptidase		-4.37409	0.00199601	0.0213908	0.035321	1	1	1	1.02298	2.9581	0.0179936	3.02607	0.0200141
32878	735	ML	7924760	ITPKB: inositol-trisphosphate 3-kinase B		-5.24898	0.00199601	0.0213908	0.035321	1	1	1	1.02296	2.83357	0.014885	2.89863	0.0154733
31880	2641	ML	8155944	ATP5J2P3: ATP synthase, H+ transporting, mitochondrial Fo complex, subunit F2 pseudogene 3		-3.31817	0.00199601	0.0213908	0.035321	1	1	1	1.02296	2.39243	0.0285402	2.44737	0.00277369
31957	2486	ML	7927120	RET: ret proto-oncogene		-3.40008	0.00199601	0.0213908	0.035321	1	1	1	1.02295	3.049	0.029904	3.11897	0.0193934
32400	1634	ML	8009666	RAB37: RAB37, member RAS oncogene family		-4.02787	0.00199601	0.0213908	0.035321	1	1	1	1.02287	2.8887	0.0223913	2.95477	0.0174855
32044	2296	ML	7938090	CCKBR: cholecystokinin B receptor		-3.51287	0.00199601	0.0213908	0.035321	1	1	1	1.02287	3.18237	0.0199826	3.25513	0.0297984
30787	5041	ML	7978534	ENST00000411155: ncrna:snRNA chromosome:GRCh37:14:32131244:32131349:-1 gene:ENSG00000223087 gene_biotype:snRNA transcript_biotype:snRNA		-2.42799	0.00199601	0.0213908	0.035321	1	1	1	1.02286	2.38697	0.0222828	2.44153	0.0319174
31484	3442	ML	8038874	FLJ30403: uncharacterized LOC729975		-2.9407	0.00199601	0.0213908	0.035321	1	1	1	1.02285	2.72023	0.0318996	2.7824	0.0179758
31001	4536	ML	8098041	TMEM144: transmembrane protein 144		-2.5778	0.00199601	0.0213908	0.035321	1	1	1	1.02285	2.95737	0.029849	3.02493	0.0342065
29292	8718	ML	8139776	ENST00000459933: ncrna_pseudogene:Mt_tRNA_pseudogene chromosome:GRCh37:7:57240999:57241066:-1 gene:ENSG00000243950 gene_biotype:Mt_tRNA_pseudogene transcript_biotype:Mt_tRNA_pseudogene		-1.7369	0.00199601	0.0213908	0.035321	1	1	1	1.02279	1.7563	0.0101828	1.79633	0.0386011
32507	1426	ML	7952950	ENST00000318291: cdna:known chromosome:GRCh37:12:752147:754581:1 gene:ENSG00000177406 gene_biotype:antisense transcript_biotype:antisense		-4.21168	0.00199601	0.0213908	0.035321	1	1	1	1.02275	2.8878	0.0245145	2.9535	0.0113609
32474	1498	ML	8088264	IL17RD: interleukin 17 receptor D		-4.14817	0.00199601	0.0213908	0.035321	1	1	1	1.02272	3.3949	0.0308582	3.47203	0.00922189
31724	2957	ML	7931168	7931168: unannotated transcript: chr10:124768429-124817827		-3.15525	0.00199601	0.0213908	0.035321	1	1	1	1.02267	3.2415	0.0208646	3.315	0.0345336
32651	1163	ML	7960427	AKAP3: A kinase (PRKA) anchor protein 3		-4.51119	0.00199601	0.0213908	0.035321	1	1	1	1.02266	2.78777	0.00889513	2.85093	0.0225624
30276	6257	ML	7921119	ENST00000483498: ncrna_pseudogene:scRNA_pseudogene chromosome:GRCh37:1:156702981:156703049:-1 gene:ENSG00000242883 gene_biotype:scRNA_pseudogene transcript_biotype:scRNA_pseudogene		-2.14885	0.00199601	0.0213908	0.035321	1	1	1	1.02264	2.29257	0.0414568	2.34447	0.0056003
33027	443	ML	8118259	MSH5: mutS homolog 5 (E. coli)		-6.19465	0.00199601	0.0213908	0.035321	1	1	1	1.02262	3.10357	0.0170474	3.17377	0.00972899
33055	397	ML	7904226	SLC22A15: solute carrier family 22, member 15		-6.39711	0.00199601	0.0213908	0.035321	1	1	1	1.02259	2.95433	0.0105462	3.02107	0.0146712
33022	459	ML	7937979	OR51T1: olfactory receptor, family 51, subfamily T, member 1		-6.11079	0.00199601	0.0213908	0.035321	1	1	1	1.02244	2.42833	0.0129855	2.48283	0.0083668
30961	4635	ML	7985932	ENST00000491561: ncrna_pseudogene:scRNA_pseudogene chromosome:GRCh37:15:90709468:90709758:1 gene:ENSG00000240470 gene_biotype:scRNA_pseudogene transcript_biotype:scRNA_pseudogene		-2.55013	0.00199601	0.0213908	0.035321	1	1	1	1.02242	2.51107	0.0349346	2.56737	0.01555
30430	5892	ML	8168622	KLHL4: kelch-like 4 (Drosophila)		-2.22897	0.00199601	0.0213908	0.035321	1	1	1	1.02236	3.0919	0.0529805	3.16103	0.00888951
32402	1632	ML	7987145	LOC100653168: formin-1-like		-4.02983	0.00199601	0.0213908	0.035321	1	1	1	1.02235	2.77137	0.021727	2.8333	0.0153795
32261	1879	ML	7988970	FAM214A: family with sequence similarity 214, member A		-3.80818	0.00199601	0.0213908	0.035321	1	1	1	1.02234	2.95587	0.0227821	3.0219	0.0195701
32739	997	ML	8130867	THBS2: thrombospondin 2		-4.76051	0.00199601	0.0213908	0.035321	1	1	1	1.02234	3.3677	0.0223464	3.44293	0.0158083
31885	2634	ML	7957673	C12orf55: chromosome 12 open reading frame 55		-3.32157	0.00199601	0.0213908	0.035321	1	1	1	1.02233	2.44687	0.0260715	2.5015	0.0114843
32179	2037	ML	8022817	KLHL14: kelch-like 14 (Drosophila)		-3.68488	0.00199601	0.0213908	0.035321	1	1	1	1.02233	2.7291	0.0191789	2.79003	0.0212719
32902	684	ML	8073062	APOBEC3B: apolipoprotein B mRNA editing enzyme, catalytic polypeptide-like 3B		-5.40422	0.00199601	0.0213908	0.035321	1	1	1	1.02233	3.3041	0.0193528	3.37787	0.0135803
30708	5239	ML	8137046	ENST00000362500: ncrna:snoRNA chromosome:GRCh37:7:148086741:148086950:1 gene:ENSG00000199370 gene_biotype:snoRNA transcript_biotype:snoRNA		-2.38087	0.00199601	0.0213908	0.035321	1	1	1	1.02228	2.8639	0.00622334	2.9277	0.0459945
33221	136	ML	8096385	HERC3: HECT and RLD domain containing E3 ubiquitin protein ligase 3		-8.53167	0.00199601	0.0213908	0.035321	1	1	1	1.02227	2.99847	0.00277909	3.06523	0.0132666
31743	2920	ML	7944832	OR8G3P: olfactory receptor, family 8, subfamily G, member 3 pseudogene		-3.17493	0.00199601	0.0213908	0.035321	1	1	1	1.02223	1.9392	0.0227693	1.9823	0.005866
30389	5984	ML	7953749	CLEC4D: C-type lectin domain family 4, member D		-2.20932	0.00199601	0.0213908	0.035321	1	1	1	1.02222	2.4965	0.0131183	2.55197	0.0414585
32380	1659	ML	7935123	FRA10AC1: fragile site, folic acid type, rare, fra(10)(q23.3) or fra(10)(q24.2) candidate 1		-4.00748	0.00199601	0.0213908	0.035321	1	1	1	1.02222	2.8852	0.0207065	2.9493	0.0184057
31551	3290	ML	7994343	ENST00000363268: ncrna:misc_RNA chromosome:GRCh37:16:28194639:28194751:1 gene:ENSG00000200138 gene_biotype:misc_RNA transcript_biotype:misc_RNA		-3.00624	0.00199601	0.0213908	0.035321	1	1	1	1.02221	1.98077	0.00480139	2.02477	0.0248918
31728	2952	ML	8146711	C8orf44: chromosome 8 open reading frame 44		-3.15896	0.00199601	0.0213908	0.035321	1	1	1	1.02221	2.75107	0.0292086	2.81217	0.0164065
33093	336	ML	8111993	FGF10: fibroblast growth factor 10		-6.73579	0.00199601	0.0213908	0.035321	1	1	1	1.02209	2.49333	0.011012	2.5484	0.00890169
31795	2819	ML	8118890	SCUBE3: signal peptide, CUB domain, EGF-like 3		-3.21733	0.00199601	0.0213908	0.035321	1	1	1	1.02208	3.03073	0.0328221	3.09767	0.0148702
32643	1173	ML	7950409	KCNE3: potassium voltage-gated channel, Isk-related family, member 3		-4.4945	0.00199601	0.0213908	0.035321	1	1	1	1.02208	2.76547	0.00544457	2.82653	0.0228948
31520	3351	ML	8139228	C7orf25: chromosome 7 open reading frame 25		-2.98068	0.00199601	0.0213908	0.035321	1	1	1	1.02206	2.83447	0.0350192	2.897	0.00969948
31789	2840	ML	8124482	ENST00000410868: ncrna:snRNA chromosome:GRCh37:6:27077569:27077759:-1 gene:ENSG00000222800 gene_biotype:snRNA transcript_biotype:snRNA		-3.20867	0.00199601	0.0213908	0.035321	1	1	1	1.02204	1.85907	0.00399291	1.90003	0.0217505
31289	3891	ML	8023598	RNF152: ring finger protein 152		-2.77338	0.00199601	0.0213908	0.035321	1	1	1	1.022	2.9979	0.0208928	3.06387	0.0355072
30405	5951	ML	8125415	C6orf10: chromosome 6 open reading frame 10		-2.21474	0.00199601	0.0213908	0.035321	1	1	1	1.02199	2.18123	0.0203117	2.2292	0.0315378
30297	6199	ML	8160803	ENST00000384305: ncrna:misc_RNA chromosome:GRCh37:9:34389941:34390049:-1 gene:ENSG00000207032 gene_biotype:misc_RNA transcript_biotype:misc_RNA		-2.16402	0.00199601	0.0213908	0.035321	1	1	1	1.02199	2.13293	0.0367696	2.17983	0.00755667
31832	2726	ML	8165888	AF118077: Homo sapiens PRO1808 mRNA, complete cds.		-3.27185	0.00199601	0.0213908	0.035321	1	1	1	1.02196	2.82013	0.0259787	2.88207	0.0200011
33286	17	ML	7986049	CRTC3: CREB regulated transcription coactivator 3		-13.4955	0.00199601	0.0213908	0.035321	1	1	1	1.02195	3.1211	0.0049366	3.1896	0.00727461
33125	281	ML	8073072	APOBEC3D: apolipoprotein B mRNA editing enzyme, catalytic polypeptide-like 3D		-7.05812	0.00199601	0.0213908	0.035321	1	1	1	1.02193	3.2821	0.0143628	3.35407	0.0102763
33122	286	ML	7911233	OR2T8: olfactory receptor, family 2, subfamily T, member 8		-7.02799	0.00199601	0.0213908	0.035321	1	1	1	1.02192	2.6403	0.00701498	2.69817	0.0124167
30825	4952	ML	8129872	OLIG3: oligodendrocyte transcription factor 3		-2.45491	0.00199601	0.0213908	0.035321	1	1	1	1.0219	2.75657	0.0144808	2.81693	0.0400543
31300	3867	ML	7938133	DNHD1: dynein heavy chain domain 1		-2.78303	0.00199601	0.0213908	0.035321	1	1	1	1.02182	2.97217	0.0267524	3.03703	0.0302338
29723	7582	ML	8081590	PHLDB2: pleckstrin homology-like domain, family B, member 2		-1.9051	0.00199601	0.0213908	0.035321	1	1	1	1.02181	3.15107	0.060248	3.2198	0.0165879
32911	669	ML	8169249	MID2: midline 2		-5.43108	0.00199601	0.0213908	0.035321	1	1	1	1.02178	2.95497	0.0196676	3.01933	0.00587906
31392	3656	ML	8022892	ZNF396: zinc finger protein 396		-2.85321	0.00199601	0.0213908	0.035321	1	1	1	1.02173	2.53733	0.0252599	2.59247	0.0219569
31296	3872	ML	8058535	CRYGA: crystallin, gamma A		-2.78032	0.00199601	0.0213908	0.035321	1	1	1	1.02173	2.42547	0.0245533	2.47817	0.0217939
32758	968	ML	7895889	7895889: unannotated transcript: ---:-------		-4.81573	0.00199601	0.0213908	0.035321	1	1	1	1.02169	2.62617	0.0196696	2.68313	0.00573614
30808	5002	ML	8101587	MAPK10: mitogen-activated protein kinase 10		-2.43912	0.00199601	0.0213908	0.035321	1	1	1	1.02169	2.97717	0.0133751	3.04173	0.0438555
31524	3344	ML	7950699	ENST00000516224: ncrna:snRNA chromosome:GRCh37:11:78290300:78290401:-1 gene:ENSG00000252033 gene_biotype:snRNA transcript_biotype:snRNA		-2.98293	0.00199601	0.0213908	0.035321	1	1	1	1.02168	1.90033	0.0173949	1.94153	0.0164233
30952	4656	ML	8180313	NM_014407.3: Homo sapiens potassium large conductance calcium-activated channel, subfamily M beta member 3 (KCNMB3), transcript variant 4, mRNA		-2.546	0.00199601	0.0213908	0.035321	1	1	1	1.02155	2.651	0.0362004	2.70813	0.0141507
31933	2543	ML	8007949	C17orf57: chromosome 17 open reading frame 57		-3.37707	0.00199601	0.0213908	0.035321	1	1	1	1.02154	2.5746	0.0201911	2.63007	0.0200403
31810	2767	ML	7921862	C1orf192: chromosome 1 open reading frame 192		-3.24941	0.00199601	0.0213908	0.035321	1	1	1	1.02152	2.34073	0.012155	2.3911	0.023938
32731	1012	ML	8008350	MYCBPAP: MYCBP associated protein		-4.73275	0.00199601	0.0213908	0.035321	1	1	1	1.02147	2.7584	0.0200816	2.81763	0.00816415
30307	6173	ML	8092241	8092241: unannotated transcript: chr3:178957789-178984838		-2.17031	0.00199601	0.0213908	0.035321	1	1	1	1.02147	2.7795	0.00536936	2.83917	0.0473143
31884	2635	ML	8146285	HGSNAT: heparan-alpha-glucosaminide N-acetyltransferase		-3.32098	0.00199601	0.0213908	0.035321	1	1	1	1.02145	3.1825	0.0273666	3.25077	0.0227759
31707	2994	ML	7980024	HEATR4: HEAT repeat containing 4		-3.14349	0.00199601	0.0213908	0.035321	1	1	1	1.02142	2.71217	0.0202429	2.77027	0.0248003
32566	1317	ML	8098902	ENST00000384282: ncrna:misc_RNA chromosome:GRCh37:4:1685147:1685256:-1 gene:ENSG00000207009 gene_biotype:misc_RNA transcript_biotype:misc_RNA		-4.32061	0.00199601	0.0213908	0.035321	1	1	1	1.02142	2.81883	0.0162543	2.8792	0.0179285
32772	941	ML	7894142	7894142: unannotated transcript: ---:-------		-4.84876	0.00199601	0.0213908	0.035321	1	1	1	1.02138	2.7796	0.0150702	2.83903	0.014954
31449	3509	ML	7904726	TXNIP: thioredoxin interacting protein		-2.90941	0.00199601	0.0213908	0.035321	1	1	1	1.02135	3.37163	0.0416322	3.44363	0.0102002
30675	5303	ML	7981324	ENST00000384034: ncrna:snoRNA chromosome:GRCh37:14:101611818:101612032:-1 gene:ENSG00000206761 gene_biotype:snoRNA transcript_biotype:snoRNA		-2.36522	0.00199601	0.0213908	0.035321	1	1	1	1.02133	2.03943	0.0116234	2.08293	0.0296588
32990	514	ML	8146425	ENST00000470130: ncrna_pseudogene:rRNA_pseudogene chromosome:GRCh37:8:52458866:52458953:1 gene:ENSG00000243310 gene_biotype:rRNA_pseudogene transcript_biotype:rRNA_pseudogene		-5.95324	0.00199601	0.0213908	0.035321	1	1	1	1.02131	2.3902	0.0124471	2.44113	0.00804135
33163	218	ML	7942476	PAAF1: proteasomal ATPase-associated factor 1		-7.70414	0.00199601	0.0213908	0.035321	1	1	1	1.02128	3.14343	0.0116243	3.21033	0.00954428
32954	591	ML	8139121	8139121: unannotated transcript: chr7:38396908-38398763		-5.65714	0.00199601	0.0213908	0.035321	1	1	1	1.02126	2.626	0.00943027	2.68183	0.0142581
31294	3878	ML	7921667	CD48: CD48 molecule		-2.77848	0.00199601	0.0213908	0.035321	1	1	1	1.02126	2.71243	0.0111554	2.7701	0.0341737
30521	5666	ML	8055702	NMI: N-myc (and STAT) interactor		-2.27897	0.00199601	0.0213908	0.035321	1	1	1	1.02123	2.9675	0.0472406	3.0305	0.00780449
30163	6566	ML	7893246	7893246: unannotated transcript: ---:-------		-2.08373	0.00199601	0.0213908	0.035321	1	1	1	1.02123	2.8091	0.0130564	2.86873	0.0478184
32858	772	ML	7990283	GOLGA6A: golgin A6 family, member A		-5.17315	0.00199601	0.0213908	0.035321	1	1	1	1.02114	2.87737	0.0115336	2.9382	0.0167878
30184	6514	ML	8129558	OR2A4: olfactory receptor, family 2, subfamily A, member 4		-2.09317	0.00199601	0.0213908	0.035321	1	1	1	1.02113	2.8568	0.0256041	2.91717	0.0428911
31387	3670	ML	8172367	ENST00000487797: ncrna_pseudogene:rRNA_pseudogene chromosome:GRCh37:X:47749439:47749802:-1 gene:ENSG00000239738 gene_biotype:rRNA_pseudogene transcript_biotype:rRNA_pseudogene		-2.84964	0.00199601	0.0213908	0.035321	1	1	1	1.02111	2.4345	0.022032	2.4859	0.0221502
31068	4392	ML	8162183	LOC440173: uncharacterized LOC440173		-2.622	0.00199601	0.0213908	0.035321	1	1	1	1.02109	3.17193	0.0286305	3.23883	0.0336649
30554	5602	ML	8144488	LOC349196: uncharacterized LOC349196		-2.296	0.00199601	0.0213908	0.035321	1	1	1	1.02108	3.01167	0.045811	3.07517	0.0140015
32804	880	ML	8070257	PIGP: phosphatidylinositol glycan anchor biosynthesis, class P		-4.97021	0.00199601	0.0213908	0.035321	1	1	1	1.02106	2.887	0.0145688	2.9478	0.0153844
32314	1772	ML	8074962	GSTT2: glutathione S-transferase theta 2		-3.90015	0.00199601	0.0213908	0.035321	1	1	1	1.02103	2.9374	0.011212	2.99917	0.0250344
32315	1773	ML	8071809	GSTT2: glutathione S-transferase theta 2		-3.90015	0.00199601	0.0213908	0.035321	1	1	1	1.02103	2.9374	0.011212	2.99917	0.0250344
30547	5616	ML	8131441	AK123300: Homo sapiens cDNA FLJ41306 fis, clone BRAMY2042549.		-2.29249	0.00199601	0.0213908	0.035321	1	1	1	1.02103	2.95963	0.0316064	3.02187	0.0348117
31212	4067	ML	8174767	FAM70A: family with sequence similarity 70, member A		-2.71664	0.00199601	0.0213908	0.035321	1	1	1	1.02102	2.91463	0.0386083	2.9759	0.00593549
31746	2915	ML	8044225	SULT1C4: sulfotransferase family, cytosolic, 1C, member 4		-3.17764	0.00199601	0.0213908	0.035321	1	1	1	1.021	2.77417	0.0292303	2.83243	0.0124203
31415	3587	ML	7989037	CCPG1: cell cycle progression 1		-2.88478	0.00199601	0.0213908	0.035321	1	1	1	1.02098	2.94343	0.0317901	3.0052	0.0190974
31155	4190	ML	8121850	HEY2: hairy/enhancer-of-split related with YRPW motif 2		-2.68557	0.00199601	0.0213908	0.035321	1	1	1	1.02097	3.12467	0.0408755	3.1902	0.0107503
31508	3371	ML	8065339	LOC284788: uncharacterized LOC284788		-2.96759	0.00199601	0.0213908	0.035321	1	1	1	1.02097	2.01557	0.0222154	2.05783	0.0107258
31040	4458	ML	8088299	DNAH12: dynein, axonemal, heavy chain 12		-2.60315	0.00199601	0.0213908	0.035321	1	1	1	1.02096	2.04343	0.00471204	2.08627	0.0281077
32320	1766	ML	8043393	THNSL2: threonine synthase-like 2 (S. cerevisiae)		-3.90459	0.00199601	0.0213908	0.035321	1	1	1	1.02095	3.00593	0.0250767	3.0689	0.0123016
32729	1015	ML	7942061	7942061: unannotated transcript: chr11:68390691-68406617		-4.73071	0.00199601	0.0213908	0.035321	1	1	1	1.02093	3.22467	0.0236542	3.29217	0.00715844
32209	1973	ML	8130408	IPCEF1: interaction protein for cytohesin exchange factors 1		-3.73968	0.00199601	0.0213908	0.035321	1	1	1	1.0209	2.692	0.00935788	2.74827	0.0243221
30927	4707	ML	8002216	ENST00000364980: ncrna:misc_RNA chromosome:GRCh37:16:68123352:68123446:-1 gene:ENSG00000201850 gene_biotype:misc_RNA transcript_biotype:misc_RNA		-2.52609	0.00199601	0.0213908	0.035321	1	1	1	1.0209	1.79603	0.0160951	1.83357	0.0200812
32684	1112	ML	7975971	SAMD15: sterile alpha motif domain containing 15		-4.59376	0.00199601	0.0213908	0.035321	1	1	1	1.02084	2.65643	0.0110636	2.7118	0.0177028
31757	2897	ML	8074780	YPEL1: yippee-like 1 (Drosophila)		-3.18632	0.00199601	0.0213908	0.035321	1	1	1	1.02075	3.1871	0.0355526	3.25323	0.00532666
32325	1759	ML	7978756	FSCB: fibrous sheath CABYR binding protein		-3.91161	0.00199601	0.0213908	0.035321	1	1	1	1.02074	2.24793	0.0112882	2.29457	0.0172906
32932	628	ML	8097435	C4orf33: chromosome 4 open reading frame 33		-5.54812	0.00199601	0.0213908	0.035321	1	1	1	1.02074	2.7277	0.0106071	2.78427	0.0141189
32782	921	ML	8138822	AK097033: Homo sapiens cDNA FLJ39714 fis, clone SMINT2013181.		-4.87612	0.00199601	0.0213908	0.035321	1	1	1	1.02072	2.82667	0.0186693	2.88523	0.00917842
31668	3068	ML	8112596	ANKRA2: ankyrin repeat, family A (RFXANK-like), 2		-3.11252	0.00199601	0.0213908	0.035321	1	1	1	1.02071	2.90157	0.0224598	2.96167	0.0247807
33041	419	ML	8143461	ENST00000467195: ncrna_pseudogene:Mt_tRNA_pseudogene chromosome:GRCh37:2:140979058:140979125:-1 gene:ENSG00000241982 gene_biotype:Mt_tRNA_pseudogene transcript_biotype:Mt_tRNA_pseudogene		-6.30343	0.00199601	0.0213908	0.035321	1	1	1	1.02071	2.7664	0.00670895	2.8237	0.0142439
32725	1021	ML	8070010	SYNJ1: synaptojanin 1		-4.71968	0.00199601	0.0213908	0.035321	1	1	1	1.02069	2.94897	0.00527004	3.00997	0.0217569
31721	2963	ML	7986675	NIPA1: non imprinted in Prader-Willi/Angelman syndrome 1		-3.15339	0.00199601	0.0213908	0.035321	1	1	1	1.02068	3.00977	0.0317736	3.072	0.0126052
31221	4052	ML	8129231	FAM184A: family with sequence similarity 184, member A		-2.72065	0.00199601	0.0213908	0.035321	1	1	1	1.02066	3.0474	0.030985	3.11037	0.0254335
33052	402	ML	8143327	PARP12: poly (ADP-ribose) polymerase family, member 12		-6.36959	0.00199601	0.0213908	0.035321	1	1	1	1.02065	3.06917	0.0112784	3.13253	0.013027
33269	50	ML	7964119	STAT2: signal transducer and activator of transcription 2, 113kDa		-10.5471	0.00199601	0.0213908	0.035321	1	1	1	1.02062	3.18733	0.0101943	3.25307	0.00355012
31959	2473	ML	8101260	ANTXR2: anthrax toxin receptor 2		-3.4081	0.00199601	0.0213908	0.035321	1	1	1	1.02059	3.1405	0.0282898	3.20517	0.0167264
32298	1810	ML	7981233	ENST00000411367: ncrna:misc_RNA chromosome:GRCh37:14:97104524:97104851:-1 gene:ENSG00000223299 gene_biotype:misc_RNA transcript_biotype:misc_RNA		-3.87087	0.00199601	0.0213908	0.035321	1	1	1	1.0205	2.71213	0.0201753	2.76773	0.0145569
32979	546	ML	8099524	LDB2: LIM domain binding 2		-5.83031	0.00199601	0.0213908	0.035321	1	1	1	1.02049	3.37873	0.0197617	3.44797	0.00570117
30035	6880	ML	8150157	ENST00000391105: ncrna:snRNA chromosome:GRCh37:8:32769011:32769116:-1 gene:ENSG00000212407 gene_biotype:snRNA transcript_biotype:snRNA		-2.02232	0.00199601	0.0213908	0.035321	1	1	1	1.02046	1.74307	0.00664555	1.77873	0.0298157
32167	2069	ML	8146863	SULF1: sulfatase 1		-3.66137	0.00199601	0.0213908	0.035321	1	1	1	1.02042	3.07753	0.0289424	3.14037	0.00677151
29974	7023	ML	7991467	RN5S401: RNA, 5S ribosomal 401		-1.99802	0.00199601	0.0213908	0.035321	1	1	1	1.02037	1.9862	0.0342378	2.02667	0.00763959
32644	1171	ML	7976578	AK7: adenylate kinase 7		-4.49666	0.00199601	0.0213908	0.035321	1	1	1	1.02035	2.82203	0.0154643	2.87947	0.0158197
31500	3402	ML	8119951	CAPN11: calpain 11		-2.95624	0.00199601	0.0213908	0.035321	1	1	1	1.02029	2.7894	0.0311559	2.846	0.0113583
30638	5399	ML	8168569	CYLC1: cylicin, basic protein of sperm head cytoskeleton 1		-2.34236	0.00199601	0.0213908	0.035321	1	1	1	1.02028	2.1203	0.0168935	2.1633	0.0269371
31117	4271	ML	7898609	PLA2G5: phospholipase A2, group V		-2.65661	0.00199601	0.0213908	0.035321	1	1	1	1.02025	2.74503	0.0224591	2.80063	0.0284542
31206	4078	ML	8108708	PCDHB7: protocadherin beta 7		-2.7137	0.00199601	0.0213908	0.035321	1	1	1	1.02025	2.73077	0.0225633	2.78607	0.0271421
33174	200	ML	8179848	HSPA1L: heat shock 70kDa protein 1-like		-7.80024	0.00199601	0.0213908	0.035321	1	1	1	1.02022	2.78083	0.00251064	2.83707	0.0122317
33175	201	ML	8178650	HSPA1L: heat shock 70kDa protein 1-like		-7.80024	0.00199601	0.0213908	0.035321	1	1	1	1.02022	2.78083	0.00251064	2.83707	0.0122317
33176	199	ML	8125134	HSPA1L: heat shock 70kDa protein 1-like		-7.80024	0.00199601	0.0213908	0.035321	1	1	1	1.02022	2.78083	0.00251064	2.83707	0.0122317
32645	1170	ML	8141138	ENST00000496274: ncrna_pseudogene:scRNA_pseudogene chromosome:GRCh37:7:96569380:96569675:-1 gene:ENSG00000244318 gene_biotype:scRNA_pseudogene transcript_biotype:scRNA_pseudogene		-4.49706	0.00199601	0.0213908	0.035321	1	1	1	1.0202	1.9375	0.0100732	1.97663	0.0112117
32310	1780	ML	7902799	LOC339524: uncharacterized LOC339524		-3.8951	0.00199601	0.0213908	0.035321	1	1	1	1.02019	2.80333	0.0206069	2.85993	0.0144504
33292	9	ML	7966223	ENST00000363404: ncrna:snRNA chromosome:GRCh37:12:110005780:110005920:-1 gene:ENSG00000200274 gene_biotype:snRNA transcript_biotype:snRNA		-16.1322	0.00199601	0.0213908	0.035321	1	0.895	0.895	1.02018	2.96983	0.00600528	3.02977	0.00231157
30661	5339	ML	8120151	OPN5: opsin 5		-2.35487	0.00199601	0.0213908	0.035321	1	1	1	1.02013	2.42803	0.0135552	2.4769	0.0332883
31913	2580	ML	7894831	7894831: unannotated transcript: ---:-------		-3.35604	0.00199601	0.0213908	0.035321	1	1	1	1.0201	2.67463	0.0198094	2.7284	0.0194317
30571	5568	ML	7986517	GENSCAN00000003598: cdna:genscan chromosome:GRCh37:15:102285799:102304970:1 transcript_biotype:protein_coding		-2.30384	0.00199601	0.0213908	0.035321	1	1	1	1.02009	3.31627	0.0198286	3.3829	0.0460042
30572	5569	ML	7986522	GENSCAN00000003598: cdna:genscan chromosome:GRCh37:15:102285799:102304970:1 transcript_biotype:protein_coding		-2.30384	0.00199601	0.0213908	0.035321	1	1	1	1.02009	3.31627	0.0198286	3.3829	0.0460042
31564	3267	ML	8099696	SEPSECS: Sep (O-phosphoserine) tRNA:Sec (selenocysteine) tRNA synthase		-3.01612	0.00199601	0.0213908	0.035321	1	1	1	1.02008	3.0392	0.0324948	3.10023	0.0131356
31823	2742	ML	8161346	LOC100653002: zinc finger protein 658-like		-3.26158	0.00199601	0.0213908	0.035321	1	1	1	1.02008	2.87677	0.0303652	2.93453	0.00436157
31256	3960	ML	8116482	8116482: unannotated transcript: chr5:180166123-180167058		-2.75057	0.00199601	0.0213908	0.035321	1	1	1	1.02006	2.5902	0.0242378	2.64217	0.0219858
31298	3869	ML	7919314	FMO5: flavin containing monooxygenase 5		-2.78175	0.00199601	0.0213908	0.035321	1	1	1	1.02006	2.64587	0.0316895	2.69893	0.00935646
31233	4012	ML	8159984	PLGRKT: plasminogen receptor, C-terminal lysine transmembrane protein		-2.73392	0.00199601	0.0213908	0.035321	1	1	1	1.02005	2.9987	0.0349052	3.05883	0.0152644
31815	2756	ML	8123388	UNC93A: unc-93 homolog A (C. elegans)		-3.25562	0.00199601	0.0213908	0.035321	1	1	1	1.02005	2.76667	0.0255142	2.82213	0.0148264
33257	81	ML	7937079	BNIP3: BCL2/adenovirus E1B 19kDa interacting protein 3		-9.60107	0.00199601	0.0213908	0.035321	1	1	1	1.02005	3.54527	0.00437531	3.61633	0.0120509
32126	2148	ML	7940135	GLYATL1: glycine-N-acyltransferase-like 1		-3.60934	0.00199601	0.0213908	0.035321	1	1	1	1.02004	2.99377	0.0240508	3.05377	0.0158298
32671	1127	ML	7961291	TAS2R31: taste receptor, type 2, member 31		-4.57295	0.00199601	0.0213908	0.035321	1	1	1	1.02	2.9098	0.0104403	2.968	0.0194147
30288	6230	ML	8058462	MDH1B: malate dehydrogenase 1B, NAD (soluble)		-2.1561	0.00199601	0.0213908	0.035321	1	1	1	1.01994	2.68823	0.0430174	2.74183	0.00187705
31131	4245	ML	8049961	TCONS_l2_00014356-XLOC_l2_007835: linc-ORC6-14 chr2:+:243036927-243101623		-2.66676	0.00199601	0.0213908	0.035321	1	1	1	1.01993	3.24413	0.0412719	3.3088	0.00779038
32497	1439	ML	7958423	ENST00000363190: ncrna:misc_RNA chromosome:GRCh37:12:109132260:109132380:1 gene:ENSG00000200060 gene_biotype:misc_RNA transcript_biotype:misc_RNA		-4.20687	0.00199601	0.0213908	0.035321	1	1	1	1.01993	2.4402	0.013497	2.48883	0.0147907
33090	342	ML	7943160	SCARNA9L: small Cajal body-specific RNA 9-like		-6.71602	0.00199601	0.0213908	0.035321	1	1	1	1.0199	3.2381	0.00795676	3.30253	0.0145885
30992	4562	ML	7909801	LYPLAL1: lysophospholipase-like 1		-2.57134	0.00199601	0.0213908	0.035321	1	1	1	1.01989	2.93997	0.0213542	2.99843	0.0330911
32584	1277	ML	7942816	ENST00000494381: ncrna_pseudogene:Mt_tRNA_pseudogene chromosome:GRCh37:16:10817213:10817279:-1 gene:ENSG00000240892 gene_biotype:Mt_tRNA_pseudogene transcript_biotype:Mt_tRNA_pseudogene		-4.38415	0.00199601	0.0213908	0.035321	1	1	1	1.01988	1.6837	0.00901166	1.71717	0.00967488
30807	5004	ML	7990654	TCONS_l2_00008763-XLOC_l2_004744: linc-MORF4L1-3 chr15:+:78998356-79029199		-2.43879	0.00199601	0.0213908	0.035321	1	1	1	1.01988	2.81073	0.0302882	2.8666	0.0256299
30716	5223	ML	8069135	C21orf90: chromosome 21 open reading frame 90		-2.38472	0.00199601	0.0213908	0.035321	1	1	1	1.01984	3.08007	0.0176795	3.14117	0.040704
33098	321	ML	8036820	ZNF780A: zinc finger protein 780A		-6.82035	0.00199601	0.0213908	0.035321	1	1	1	1.01983	2.98267	0.0142977	3.0418	0.00459239
31656	3089	ML	7894673	7894673: unannotated transcript: ---:-------		-3.09993	0.00199601	0.0213908	0.035321	1	1	1	1.01982	2.85093	0.0277583	2.90743	0.0150354
32568	1313	ML	8048432	CYP27A1: cytochrome P450, family 27, subfamily A, polypeptide 1		-4.32391	0.00199601	0.0213908	0.035321	1	1	1	1.0198	2.98553	0.023182	3.04463	0.00480139
32593	1253	ML	8023871	ZADH2: zinc binding alcohol dehydrogenase domain containing 2		-4.41052	0.00199601	0.0213908	0.035321	1	1	1	1.01978	3.12127	0.0199254	3.183	0.0138098
31529	3324	ML	8084496	CHRD: chordin		-2.99095	0.00199601	0.0213908	0.035321	1	1	1	1.01978	2.89223	0.0154358	2.94943	0.0293081
32020	2343	ML	8168733	ENST00000427866: cdna:pseudogene chromosome:GRCh37:X:97102261:97104015:1 gene:ENSG00000233887 gene_biotype:pseudogene transcript_biotype:processed_pseudogene		-3.48696	0.00199601	0.0213908	0.035321	1	1	1	1.01976	2.54543	0.0200163	2.59573	0.0149534
29753	7518	ML	8073330	ENST00000485524: ncrna_pseudogene:scRNA_pseudogene chromosome:GRCh37:22:41313125:41313385:1 gene:ENSG00000239343 gene_biotype:scRNA_pseudogene transcript_biotype:scRNA_pseudogene		-1.91855	0.00199601	0.0213908	0.035321	1	1	1	1.01974	2.14507	0.0357504	2.1874	0.0135104
29755	7512	ML	8091877	ENST00000483244: ncrna_pseudogene:Mt_tRNA_pseudogene chromosome:GRCh37:3:165878493:165878559:-1 gene:ENSG00000240353 gene_biotype:Mt_tRNA_pseudogene transcript_biotype:Mt_tRNA_pseudogene		-1.9193	0.00199601	0.0213908	0.035321	1	1	1	1.01973	1.7029	0.0210758	1.7365	0.0217998
32067	2258	ML	7955045	PCED1B: PC-esterase domain containing 1B		-3.54052	0.00199601	0.0213908	0.035321	1	1	1	1.01971	2.86357	0.00835125	2.92	0.0263143
32154	2089	ML	7938231	PPFIBP2: PTPRF interacting protein, binding protein 2 (liprin beta 2)		-3.64718	0.00199601	0.0213908	0.035321	1	1	1	1.0197	2.97267	0.0260408	3.03123	0.00977053
32030	2327	ML	7909689	SMYD2: SET and MYND domain containing 2		-3.49684	0.00199601	0.0213908	0.035321	1	1	1	1.01969	3.0603	0.0225595	3.12057	0.019549
33132	267	ML	8114593	APBB3: amyloid beta (A4) precursor protein-binding, family B, member 3		-7.16249	0.00199601	0.0213908	0.035321	1	1	1	1.01969	3.15263	0.0121944	3.2147	0.00875043
30584	5538	ML	7973850	AKAP6: A kinase (PRKA) anchor protein 6		-2.31061	0.00199601	0.0213908	0.035321	1	1	1	1.01967	2.68547	0.0287232	2.7383	0.0272666
31159	4184	ML	8110032	CREBRF: CREB3 regulatory factor		-2.68871	0.00199601	0.0213908	0.035321	1	1	1	1.01967	2.9482	0.0305413	3.0062	0.021523
31596	3213	ML	8122045	AKAP7: A kinase (PRKA) anchor protein 7		-3.03892	0.00199601	0.0213908	0.035321	1	1	1	1.01966	2.83857	0.0275874	2.89437	0.0158241
29458	8307	ML	8013784	MIR451B: microRNA 451b		-1.79849	0.00199601	0.0213908	0.035321	1	1	1	1.01964	1.9023	0.035877	1.93967	0.00280238
33293	8	ML	7971335	CCDC122: coiled-coil domain containing 122		-17.136	0.00199601	0.0213908	0.035321	1	0.895	0.895	1.01963	2.86453	0.00359212	2.92077	0.00440492
32851	785	ML	7952484	TMEM218: transmembrane protein 218		-5.14132	0.00199601	0.0213908	0.035321	1	1	1	1.01963	3.27433	0.00652865	3.3386	0.0206429
31366	3713	ML	7893162	7893162: unannotated transcript: ---:-------		-2.83324	0.00199601	0.0213908	0.035321	1	1	1	1.01962	2.44597	0.027438	2.49397	0.010403
31541	3307	ML	7990333	CYP11A1: cytochrome P450, family 11, subfamily A, polypeptide 1		-2.99758	0.00199601	0.0213908	0.035321	1	1	1	1.01959	2.95373	0.0114692	3.0116	0.0314076
31560	3276	ML	8161319	LOC100653002: zinc finger protein 658-like		-3.01253	0.00199601	0.0213908	0.035321	1	1	1	1.01957	2.88143	0.0322145	2.93783	0.0037072
32009	2370	ML	8030950	ZNF701: zinc finger protein 701		-3.46482	0.00199601	0.0213908	0.035321	1	1	1	1.01956	2.9656	0.0173251	3.0236	0.0232484
31420	3578	ML	7964602	LRIG3: leucine-rich repeats and immunoglobulin-like domains 3		-2.8875	0.00199601	0.0213908	0.035321	1	1	1	1.01953	3.17	0.0215669	3.2319	0.0302247
31136	4231	ML	7925062	SIPA1L2: signal-induced proliferation-associated 1 like 2		-2.67325	0.00199601	0.0213908	0.035321	1	1	1	1.01951	3.1208	0.014894	3.1817	0.0365394
32921	651	ML	8150785	OPRK1: opioid receptor, kappa 1		-5.49991	0.00199601	0.0213908	0.035321	1	1	1	1.0195	2.8168	0.00659394	2.87173	0.0159939
31008	4525	ML	7954701	METTL20: methyltransferase like 20		-2.58154	0.00199601	0.0213908	0.035321	1	1	1	1.01944	2.5306	0.0119147	2.5798	0.0307849
32695	1092	ML	8025978	ZNF763: zinc finger protein 763		-4.619	0.00199601	0.0213908	0.035321	1	1	1	1.01936	2.80287	0.0169211	2.85713	0.0113032
33278	33	ML	8056047	WDSUB1: WD repeat, sterile alpha motif and U-box domain containing 1		-11.5183	0.00199601	0.0213908	0.035321	1	1	1	1.01935	2.9164	0.00632376	2.97283	0.00565892
32028	2331	ML	7992917	CLUAP1: clusterin associated protein 1		-3.49583	0.00199601	0.0213908	0.035321	1	1	1	1.01933	2.9587	0.0240077	3.0159	0.0150602
32843	803	ML	7894736	7894736: unannotated transcript: ---:-------		-5.11504	0.00199601	0.0213908	0.035321	1	1	1	1.01931	2.97243	0.00785005	3.02983	0.017781
31821	2746	ML	8021222	ELAC1: elaC homolog 1 (E. coli)		-3.26009	0.00199601	0.0213908	0.035321	1	1	1	1.01931	2.9179	0.019554	2.97423	0.0226584
30718	5219	ML	8118820	ENST00000459226: ncrna:snoRNA chromosome:GRCh37:6:34660557:34660660:1 gene:ENSG00000238484 gene_biotype:snoRNA transcript_biotype:snoRNA		-2.3858	0.00199601	0.0213908	0.035321	1	1	1	1.0193	2.09697	0.0283299	2.13743	0.00777775
31965	2457	ML	7957373	MYF6: myogenic factor 6 (herculin)		-3.41706	0.00199601	0.0213908	0.035321	1	1	1	1.01926	2.6687	0.0156704	2.7201	0.0208144
30251	6306	ML	8121255	ENST00000363328: ncrna:misc_RNA chromosome:GRCh37:6:106352248:106352562:1 gene:ENSG00000200198 gene_biotype:misc_RNA transcript_biotype:misc_RNA		-2.13542	0.00199601	0.0213908	0.035321	1	1	1	1.01923	1.88083	0.0235154	1.917	0.0175377
30320	6144	ML	8103202	RN5S169: RNA, 5S ribosomal 169		-2.17632	0.00199601	0.0213908	0.035321	1	1	1	1.01922	2.28873	0.0011547	2.33273	0.0349989
29984	6991	ML	8057377	CCDC141: coiled-coil domain containing 141		-2.00301	0.00199601	0.0213908	0.035321	1	1	1	1.01921	2.73157	0.0441278	2.78403	0.0105406
32904	678	ML	8142100	ATXN7L1: ataxin 7-like 1		-5.41505	0.00199601	0.0213908	0.035321	1	1	1	1.0192	3.2628	0.019111	3.32543	0.00601027
29697	7642	ML	7893145	7893145: unannotated transcript: ---:-------		-1.89599	0.00199601	0.0213908	0.035321	1	1	1	1.01918	2.8916	0.00804301	2.94707	0.0500281
28957	9519	ML	7895983	7895983: unannotated transcript: ---:-------		-1.63571	0.00199601	0.0213908	0.035321	1	1	1	1.01916	2.76083	0.025891	2.81373	0.0496732
32771	946	ML	8091078	RBP1: retinol binding protein 1, cellular		-4.84233	0.00199601	0.0213908	0.035321	1	1	1	1.01916	3.17197	0.0112167	3.23273	0.0186178
33017	468	ML	8162502	FBP1: fructose-1,6-bisphosphatase 1		-6.08639	0.00199601	0.0213908	0.035321	1	1	1	1.01912	2.95923	0.0160612	3.0158	0.00108167
30531	5651	ML	7926443	7926443: unannotated transcript: chr10:17944817-17944992		-2.28234	0.00199601	0.0213908	0.035321	1	1	1	1.01911	1.81533	0.00565361	1.85003	0.0257195
30646	5375	ML	8103364	ENST00000476732: ncrna_pseudogene:Mt_tRNA_pseudogene chromosome:GRCh37:4:156377850:156377916:-1 gene:ENSG00000242004 gene_biotype:Mt_tRNA_pseudogene transcript_biotype:Mt_tRNA_pseudogene		-2.34872	0.00199601	0.0213908	0.035321	1	1	1	1.01911	1.71097	0.010152	1.74367	0.0218733
31669	3066	ML	8096079	BIN2P1: bridging integrator 2 pseudogene 1		-3.11533	0.00199601	0.0213908	0.035321	1	1	1	1.0191	2.52047	0.0255602	2.5686	0.00792654
31119	4269	ML	8106931	ANKRD32: ankyrin repeat domain 32		-2.65766	0.00199601	0.0213908	0.035321	1	1	1	1.01909	3.02403	0.0307217	3.08177	0.0217231
30097	6726	ML	8041676	DYNC2LI1: dynein, cytoplasmic 2, light intermediate chain 1		-2.05542	0.00199601	0.0213908	0.035321	1	1	1	1.01909	2.77093	0.0281219	2.82383	0.0345876
31352	3735	ML	7895856	7895856: unannotated transcript: ---:-------		-2.82525	0.00199601	0.0213908	0.035321	1	1	1	1.01908	2.72743	0.0138482	2.77947	0.028737
29633	7815	ML	8043026	ENST00000491151: ncrna_pseudogene:Mt_tRNA_pseudogene chromosome:GRCh37:2:83042648:83042714:1 gene:ENSG00000242397 gene_biotype:Mt_tRNA_pseudogene transcript_biotype:Mt_tRNA_pseudogene		-1.8695	0.00199601	0.0213908	0.035321	1	1	1	1.01907	1.64447	0.0047648	1.67583	0.0286673
31977	2430	ML	7975136	FUT8: fucosyltransferase 8 (alpha (1,6) fucosyltransferase)		-3.43324	0.00199601	0.0213908	0.035321	1	1	1	1.01895	3.2554	0.0112903	3.3171	0.0290076
30763	5104	ML	7922018	ILDR2: immunoglobulin-like domain containing receptor 2		-2.41423	0.00199601	0.0213908	0.035321	1	1	1	1.01892	2.82957	0.01635	2.8831	0.0347527
30941	4677	ML	7893699	7893699: unannotated transcript: ---:-------		-2.53841	0.00199601	0.0213908	0.035321	1	1	1	1.01889	2.77973	0.0335464	2.83223	0.012566
30789	5033	ML	7944751	C11orf63: chromosome 11 open reading frame 63		-2.42964	0.00199601	0.0213908	0.035321	1	1	1	1.01888	2.72127	0.0283495	2.77263	0.0231779
32798	893	ML	8053775	ZNF514: zinc finger protein 514		-4.9283	0.00199601	0.0213908	0.035321	1	1	1	1.01886	2.90553	0.0154085	2.96033	0.0115544
29688	7665	ML	7966690	TBX3: T-box 3		-1.89279	0.00199601	0.0213908	0.035321	1	1	1	1.01885	2.8786	0.0179106	2.93287	0.0463157
30935	4694	ML	7967082	ENST00000410669: ncrna:misc_RNA chromosome:GRCh37:12:120942374:120942462:-1 gene:ENSG00000222601 gene_biotype:misc_RNA transcript_biotype:misc_RNA		-2.53031	0.00199601	0.0213908	0.035321	1	1	1	1.0188	2.0997	0.0113459	2.13917	0.0245178
30673	5305	ML	7963865	OR6C6: olfactory receptor, family 6, subfamily C, member 6		-2.36503	0.00199601	0.0213908	0.035321	1	1	1	1.01877	2.11807	0.0223288	2.15783	0.0186977
31881	2640	ML	8108180	ENST00000458878: ncrna:miRNA chromosome:GRCh37:5:134259743:134259812:1 gene:ENSG00000238828 gene_biotype:miRNA transcript_biotype:miRNA		-3.31827	0.00199601	0.0213908	0.035321	1	1	1	1.01877	3.02097	0.023512	3.07767	0.0179751
31249	3974	ML	8092702	LOC100132319: uncharacterized LOC100132319		-2.74628	0.00199601	0.0213908	0.035321	1	1	1	1.01876	2.3882	0.0152509	2.433	0.0237855
31775	2858	ML	8006081	ENST00000516848: ncrna:snoRNA chromosome:GRCh37:17:28104637:28104762:1 gene:ENSG00000252657 gene_biotype:snoRNA transcript_biotype:snoRNA		-3.20024	0.00199601	0.0213908	0.035321	1	1	1	1.01868	2.17367	0.0161066	2.21427	0.0149474
32432	1575	ML	8049075	B3GNT7: UDP-GlcNAc:betaGal beta-1,3-N-acetylglucosaminyltransferase 7		-4.07256	0.00199601	0.0213908	0.035321	1	1	1	1.01865	3.23623	0.0215447	3.2966	0.0139632
32888	714	ML	8013319	GRAP: GRB2-related adaptor protein		-5.30262	0.00199601	0.0213908	0.035321	1	1	1	1.01865	2.9811	0.0137066	3.0367	0.0119147
32187	2020	ML	7925904	AKR1E2: aldo-keto reductase family 1, member E2		-3.70058	0.00199601	0.0213908	0.035321	1	1	1	1.01864	2.94553	0.00960278	3.00043	0.0238341
32011	2367	ML	8089993	WDR5B: WD repeat domain 5B		-3.46985	0.00199601	0.0213908	0.035321	1	1	1	1.01861	2.88663	0.0132138	2.94037	0.0233415
33025	446	ML	8163257	LPAR1: lysophosphatidic acid receptor 1		-6.17178	0.00199601	0.0213908	0.035321	1	1	1	1.01858	2.88627	0.00146401	2.9399	0.0149803
32802	883	ML	8075897	C1QTNF6: C1q and tumor necrosis factor related protein 6		-4.96432	0.00199601	0.0213908	0.035321	1	1	1	1.01854	2.9587	0.00665507	3.01357	0.0179489
32746	986	ML	7964810	MDM1: Mdm1 nuclear protein homolog (mouse)		-4.78198	0.00199601	0.0213908	0.035321	1	1	1	1.01854	2.95983	0.0144036	3.0147	0.013692
31139	4223	ML	7976073	LOC100506718: uncharacterized LOC100506718		-2.67583	0.00199601	0.0213908	0.035321	1	1	1	1.01854	3.0678	0.0260885	3.12467	0.0259679
29991	6981	ML	7970793	SLC46A3: solute carrier family 46, member 3		-2.0057	0.00199601	0.0213908	0.035321	1	1	1	1.01851	2.5838	0.0309627	2.63163	0.027342
32531	1380	ML	8007212	STAT5A: signal transducer and activator of transcription 5A		-4.25585	0.00199601	0.0213908	0.035321	1	1	1	1.01851	2.9046	0.0105532	2.95837	0.0191691
31731	2943	ML	8040211	KLF11: Kruppel-like factor 11		-3.16174	0.00199601	0.0213908	0.035321	1	1	1	1.0185	3.19153	0.0226844	3.25057	0.0230489
31978	2429	ML	8143341	JHDM1D: jumonji C domain containing histone demethylase 1 homolog D (S. cerevisiae)		-3.43333	0.00199601	0.0213908	0.035321	1	1	1	1.01845	3.1118	0.0253379	3.1692	0.0140182
31539	3310	ML	8017162	RNFT1: ring finger protein, transmembrane 1		-2.9971	0.00199601	0.0213908	0.035321	1	1	1	1.01844	3.1514	0.0229698	3.2095	0.0244902
31269	3929	ML	8126784	PLA2G7: phospholipase A2, group VII (platelet-activating factor acetylhydrolase, plasma)		-2.76204	0.00199601	0.0213908	0.035321	1	1	1	1.01843	3.04887	0.0162795	3.10507	0.0312572
32754	973	ML	8123598	SERPINB1: serpin peptidase inhibitor, clade B (ovalbumin), member 1		-4.80797	0.00199601	0.0213908	0.035321	1	1	1	1.0184	3.22127	0.0201793	3.28053	0.00697448
32638	1186	ML	8108744	PCDHB14: protocadherin beta 14		-4.48531	0.00199601	0.0213908	0.035321	1	1	1	1.0184	3.00757	0.00973362	3.0629	0.0190218
32690	1101	ML	7929132	PCGF5: polycomb group ring finger 5		-4.60687	0.00199601	0.0213908	0.035321	1	1	1	1.01839	2.735	0.0177542	2.7853	0.00651383
31804	2792	ML	8022118	EPB41L3: erythrocyte membrane protein band 4.1-like 3		-3.2368	0.00199601	0.0213908	0.035321	1	1	1	1.01839	3.1868	0.0115287	3.2454	0.0291614
33208	155	ML	8168968	GPRASP1: G protein-coupled receptor associated sorting protein 1		-8.3229	0.00199601	0.0213908	0.035321	1	1	1	1.01836	2.8709	0.010479	2.9236	0.00323574
32019	2345	ML	8166096	TCEANC: transcription elongation factor A (SII) N-terminal and central domain containing		-3.48553	0.00199601	0.0213908	0.035321	1	1	1	1.01835	2.89187	0.0228636	2.94493	0.0131394
32438	1566	ML	8115068	TIGD6: tigger transposable element derived 6		-4.07827	0.00199601	0.0213908	0.035321	1	1	1	1.01834	2.66617	0.0148665	2.71507	0.0145015
29343	8603	ML	8034370	ZNF563: zinc finger protein 563		-1.7541	0.00199601	0.0213908	0.035321	1	1	1	1.01834	2.703	0.0133742	2.75257	0.0470808
30711	5234	ML	7924636	TMEM63A: transmembrane protein 63A		-2.38233	0.00199601	0.0213908	0.035321	1	1	1	1.01828	3.3601	0.043276	3.42153	0.01105
31571	3258	ML	8122365	GPR126: G protein-coupled receptor 126		-3.01951	0.00199601	0.0213908	0.035321	1	1	1	1.01827	3.00277	0.0285546	3.05763	0.0132349
30334	6112	ML	8042109	ENST00000363231: ncrna:snRNA chromosome:GRCh37:2:59874756:59874858:1 gene:ENSG00000200101 gene_biotype:snRNA transcript_biotype:snRNA		-2.1862	0.00199601	0.0213908	0.035321	1	1	1	1.01826	2.66653	0.0154436	2.71523	0.0353578
32724	1026	ML	7943387	C11orf70: chromosome 11 open reading frame 70		-4.71137	0.00199601	0.0213908	0.035321	1	1	1	1.01823	2.6051	0.0170608	2.6526	0.00372424
32926	641	ML	8064539	CPXM1: carboxypeptidase X (M14 family), member 1		-5.51273	0.00199601	0.0213908	0.035321	1	1	1	1.01823	3.37537	0.00566598	3.4369	0.0184843
33198	167	ML	8142102	ATXN7L1: ataxin 7-like 1		-8.11423	0.00199601	0.0213908	0.035321	1	1	1	1.01823	3.30593	0.0117185	3.3662	0.00530754
32803	882	ML	8103894	ENPP6: ectonucleotide pyrophosphatase/phosphodiesterase 6		-4.96941	0.00199601	0.0213908	0.035321	1	1	1	1.01823	2.5965	0.016241	2.64383	0.00289885
31961	2469	ML	8108720	PCDHB9: protocadherin beta 9		-3.41092	0.00199601	0.0213908	0.035321	1	1	1	1.01823	2.95523	0.0214262	3.0091	0.0170035
32184	2024	ML	8171373	GEMIN8: gem (nuclear organelle) associated protein 8		-3.69671	0.00199601	0.0213908	0.035321	1	1	1	1.01822	3.08323	0.0110097	3.1394	0.0239025
31335	3780	ML	7955663	TENC1: tensin like C1 domain containing phosphatase (tensin 2)		-2.80918	0.00199601	0.0213908	0.035321	1	1	1	1.01821	2.914	0.0245495	2.96707	0.0216301
30925	4712	ML	7926594	7926594: unannotated transcript: chr10:22222072-22222401		-2.52508	0.00199601	0.0213908	0.035321	1	1	1	1.01816	2.03357	0.0211193	2.0705	0.0139925
31299	3868	ML	7965846	CCDC53: coiled-coil domain containing 53		-2.7824	0.00199601	0.0213908	0.035321	1	1	1	1.01812	2.91197	0.0038553	2.96473	0.0326203
31912	2581	ML	8101992	SLC39A8: solute carrier family 39 (zinc transporter), member 8		-3.35569	0.00199601	0.0213908	0.035321	1	1	1	1.01809	3.50533	0.0303128	3.56873	0.012329
32377	1666	ML	7939507	ACCS: 1-aminocyclopropane-1-carboxylate synthase homolog (Arabidopsis)(non-functional)		-4.00468	0.00199601	0.0213908	0.035321	1	1	1	1.01807	2.89967	0.0221712	2.95207	0.00469716
32367	1683	ML	8070629	ERVH48-1: endogenous retrovirus group 48, member 1		-3.9893	0.00199601	0.0213908	0.035321	1	1	1	1.01803	3.49563	0.014677	3.55867	0.023099
31768	2873	ML	8110966	FAM173B: family with sequence similarity 173, member B		-3.19545	0.00199601	0.0213908	0.035321	1	1	1	1.01801	3.0093	0.0292262	3.0635	0.00298664
31706	2995	ML	8175288	MOSPD1: motile sperm domain containing 1		-3.14337	0.00199601	0.0213908	0.035321	1	1	1	1.018	3.08813	0.0288113	3.14373	0.0104165
29650	7774	ML	8021185	RN5S458: RNA, 5S ribosomal 458		-1.8758	0.00199601	0.0213908	0.035321	1	1	1	1.01799	2.41957	0.00490951	2.4631	0.0398964
30616	5450	ML	7893793	7893793: unannotated transcript: ---:-------		-2.32989	0.00199601	0.0213908	0.035321	1	1	1	1.01799	3.02427	0.040005	3.07867	0.00592312
30620	5445	ML	7912802	LOC100132147: uncharacterized LOC100132147		-2.33081	0.00199601	0.0213908	0.035321	1	1	1	1.01799	2.76687	0.0196105	2.81663	0.0313545
32748	983	ML	8032789	STAP2: signal transducing adaptor family member 2		-4.78812	0.00199601	0.0213908	0.035321	1	1	1	1.01797	3.08593	0.0172286	3.1414	0.010284
29190	8961	ML	7964997	CAPS2: calcyphosine 2		-1.70341	0.00199601	0.0213908	0.035321	1	1	1	1.01797	2.63733	0.016736	2.68473	0.0451978
32961	576	ML	8068422	DOPEY2: dopey family member 2		-5.71208	0.00199601	0.0213908	0.035321	1	1	1	1.01789	3.0649	0.0147986	3.11973	0.0075798
32156	2087	ML	7922268	KIFAP3: kinesin-associated protein 3		-3.65032	0.00199601	0.0213908	0.035321	1	1	1	1.01786	2.98353	0.0025697	3.03683	0.0251596
32773	937	ML	7917593	GEMIN8P4: gem (nuclear organelle) associated protein 8 pseudogene 4		-4.85121	0.00199601	0.0213908	0.035321	1	1	1	1.01785	2.8182	0.00859826	2.8685	0.0157667
30960	4637	ML	8091327	PLSCR1: phospholipid scramblase 1		-2.54947	0.00199601	0.0213908	0.035321	1	1	1	1.01784	3.20077	0.017806	3.25787	0.0344645
29859	7293	ML	8122703	ENST00000384562: ncrna:misc_RNA chromosome:GRCh37:6:149952573:149952685:1 gene:ENSG00000207292 gene_biotype:misc_RNA transcript_biotype:misc_RNA		-1.95538	0.00199601	0.0213908	0.035321	1	1	1	1.01784	2.92243	0.0410621	2.97457	0.0211285
33009	479	ML	8151310	EYA1: eyes absent homolog 1 (Drosophila)		-6.05751	0.00199601	0.0213908	0.035321	1	1	1	1.01783	2.98897	0.013308	3.04227	0.0074272
30844	4915	ML	8096438	ENST00000516278: ncrna:misc_RNA chromosome:GRCh37:4:91291274:91291578:1 gene:ENSG00000252087 gene_biotype:misc_RNA transcript_biotype:misc_RNA		-2.4653	0.00199601	0.0213908	0.035321	1	1	1	1.0178	2.4384	0.0116503	2.4818	0.0281782
32060	2269	ML	8140291	LOC541473: FK506 binding protein 6, 36kDa pseudogene		-3.53083	0.00199601	0.0213908	0.035321	1	1	1	1.01778	2.60997	0.0172001	2.65637	0.0149078
30373	6016	ML	8080853	ENST00000516640: ncrna:snRNA chromosome:GRCh37:3:62800057:62800166:1 gene:ENSG00000252449 gene_biotype:snRNA transcript_biotype:snRNA		-2.2028	0.00199601	0.0213908	0.035321	1	1	1	1.01776	2.35533	0.0136504	2.39717	0.0299273
33074	364	ML	7906688	PPOX: protoporphyrinogen oxidase		-6.60389	0.00199601	0.0213908	0.035321	1	1	1	1.01775	2.91313	0.00870938	2.96483	0.0103929
32554	1336	ML	7954185	DERA: deoxyribose-phosphate aldolase (putative)		-4.29952	0.00199601	0.0213908	0.035321	1	1	1	1.01774	3.17717	0.00786405	3.23353	0.021302
32112	2177	ML	8072486	FLJ20464: uncharacterized protein FLJ20464		-3.59329	0.00199601	0.0213908	0.035321	1	1	1	1.0177	2.95613	0.0211798	3.00847	0.0137027
32768	951	ML	8108753	PCDHB15: protocadherin beta 15		-4.83305	0.00199601	0.0213908	0.035321	1	1	1	1.0177	3.0929	0.0109138	3.14763	0.0162986
31292	3881	ML	7971640	RNY4P30: RNA, Ro-associated Y4 pseudogene 30		-2.77737	0.00199601	0.0213908	0.035321	1	1	1	1.01767	2.33303	0.0243017	2.37427	0.00840555
33232	122	ML	8118293	MSH5-SAPCD1: MSH5-SAPCD1 readthrough (non-protein coding)		-8.75238	0.00199601	0.0213908	0.035321	1	1	1	1.01766	3.02647	0.00620672	3.0799	0.00856096
32543	1359	ML	8126095	CCDC167: coiled-coil domain containing 167		-4.27446	0.00199601	0.0213908	0.035321	1	1	1	1.01765	3.1915	0.0212113	3.24783	0.00843465
28967	9496	ML	7895493	7895493: unannotated transcript: ---:-------		-1.63785	0.00199601	0.0213908	0.035321	1	1	1	1.01763	2.88603	0.0526737	2.9369	0.0109119
31047	4440	ML	7943158	SCARNA9L: small Cajal body-specific RNA 9-like		-2.60813	0.00199601	0.0213908	0.035321	1	1	1	1.01762	3.03773	0.0230559	3.09127	0.0270615
33215	146	ML	8103235	TIGD4: tigger transposable element derived 4		-8.47074	0.00199601	0.0213908	0.035321	1	1	1	1.01758	2.86433	0.0071122	2.9147	0.00744849
30539	5632	ML	8144392	DEFB109P1B: defensin, beta 109, pseudogene 1B		-2.28822	0.00199601	0.0213908	0.035321	1	1	1	1.01758	2.45173	0.0302485	2.49483	0.0122214
30540	5631	ML	8149245	DEFB109P1B: defensin, beta 109, pseudogene 1B		-2.28822	0.00199601	0.0213908	0.035321	1	1	1	1.01758	2.45173	0.0302485	2.49483	0.0122214
33085	348	ML	8149157	LOC349196: uncharacterized LOC349196		-6.66252	0.00199601	0.0213908	0.035321	1	1	1	1.01757	2.93623	0.0116372	2.98783	0.00667258
33086	347	ML	8149153	LOC349196: uncharacterized LOC349196		-6.66252	0.00199601	0.0213908	0.035321	1	1	1	1.01757	2.93623	0.0116372	2.98783	0.00667258
33155	230	ML	8126184	KIF6: kinesin family member 6		-7.51919	0.00199601	0.0213908	0.035321	1	1	1	1.01757	2.59947	0.00678258	2.64513	0.00804073
31195	4106	ML	8149264	PPP1R3B: protein phosphatase 1, regulatory subunit 3B		-2.70725	0.00199601	0.0213908	0.035321	1	1	1	1.01754	3.2429	0.0250294	3.29977	0.0264046
30817	4962	ML	8069808	KRTAP27-1: keratin associated protein 27-1		-2.45043	0.00199601	0.0213908	0.035321	1	1	1	1.01753	2.493	0.0273759	2.5367	0.0143063
31253	3968	ML	8124583	ZSCAN23: zinc finger and SCAN domain containing 23		-2.74868	0.00199601	0.0213908	0.035321	1	1	1	1.01752	2.82683	0.0250999	2.87637	0.0185538
33250	90	ML	7949956	MTL5: metallothionein-like 5, testis-specific (tesmin)		-9.3799	0.00199601	0.0213908	0.035321	1	1	1	1.0175	3.09747	0.00665307	3.15167	0.00747685
32815	852	ML	8121161	UFL1: UFM1-specific ligase 1		-5.02198	0.00199601	0.0213908	0.035321	1	1	1	1.01749	3.18543	0.0171489	3.24113	0.00865814
31626	3143	ML	7952810	IGSF9B: immunoglobulin superfamily, member 9B		-3.07257	0.00199601	0.0213908	0.035321	1	1	1	1.01747	2.93753	0.0218976	2.98887	0.0189173
32527	1393	ML	7932796	SVIL: supervillin		-4.2454	0.00199601	0.0213908	0.035321	1	1	1	1.01747	3.09547	0.0180622	3.14953	0.0126619
32612	1223	ML	8079189	ZNF167: zinc finger protein 167		-4.44972	0.00199601	0.0213908	0.035321	1	1	1	1.01746	3.03513	0.0139343	3.08813	0.0152133
31664	3075	ML	7988033	EPB42: erythrocyte membrane protein band 4.2		-3.10819	0.00199601	0.0213908	0.035321	1	1	1	1.01746	2.73073	0.0163891	2.7784	0.0209036
31151	4195	ML	8111915	SEPP1: selenoprotein P, plasma, 1		-2.68354	0.00199601	0.0213908	0.035321	1	1	1	1.01745	3.10763	0.0257593	3.16187	0.0237011
31072	4383	ML	8165709	NC_001807: gi|17981852|ref|NC_001807.4|:c16024-15956; gene=TRNP; product=tRNA-Pro		-2.62463	0.00199601	0.0213908	0.035321	1	1	1	1.01744	3.048	0.0275788	3.10117	0.0216892
31773	2864	ML	7913566	HTR1D: 5-hydroxytryptamine (serotonin) receptor 1D, G protein-coupled		-3.19856	0.00199601	0.0213908	0.035321	1	1	1	1.01742	3.2655	0.01878	3.3224	0.024427
31356	3728	ML	8106689	CKMT2: creatine kinase, mitochondrial 2 (sarcomeric)		-2.82806	0.00199601	0.0213908	0.035321	1	1	1	1.01737	2.915	0.0159502	2.96563	0.026594
31587	3227	ML	8112439	CCDC125: coiled-coil domain containing 125		-3.03124	0.00199601	0.0213908	0.035321	1	1	1	1.01736	2.96343	0.0264186	3.01487	0.0128753
32317	1770	ML	8020321	AF090940: Homo sapiens clone HQ0644 PRO0644 mRNA, complete cds.		-3.90111	0.00199601	0.0213908	0.035321	1	1	1	1.01735	2.57003	0.00755932	2.61463	0.0183023
32232	1924	ML	7962625	RAPGEF3: Rap guanine nucleotide exchange factor (GEF) 3		-3.76849	0.00199601	0.0213908	0.035321	1	1	1	1.01734	2.92523	0.0106782	2.97597	0.020729
33126	279	ML	7906642	KLHDC9: kelch domain containing 9		-7.06341	0.00199601	0.0213908	0.035321	1	1	1	1.01733	2.8099	0.00452106	2.8586	0.0110531
30912	4749	ML	8113577	TRIM36: tripartite motif containing 36		-2.51161	0.00199601	0.0213908	0.035321	1	1	1	1.01731	2.9905	0.0305039	3.04227	0.0185457
32884	723	ML	8130474	SERAC1: serine active site containing 1		-5.28186	0.00199601	0.0213908	0.035321	1	1	1	1.01731	3.1474	0.0124012	3.20187	0.0128539
32781	924	ML	7954460	LYRM5: LYR motif containing 5		-4.87063	0.00199601	0.0213908	0.035321	1	1	1	1.01728	3.1788	0.016673	3.23373	0.0101796
29817	7366	ML	8101359	LINC00575: long intergenic non-protein coding RNA 575		-1.94208	0.00199601	0.0213908	0.035321	1	1	1	1.01725	2.5222	0.0380709	2.5657	0.00746391
29941	7108	ML	7974689	DACT1: dapper, antagonist of beta-catenin, homolog 1 (Xenopus laevis)		-1.98546	0.00199601	0.0213908	0.035321	1	1	1	1.01724	3.25663	0.0489144	3.31277	0.00230723
32983	538	ML	8153959	DOCK8: dedicator of cytokinesis 8		-5.85123	0.00199601	0.0213908	0.035321	1	1	1	1.01722	2.85097	0.0115327	2.90007	0.00884553
30724	5209	ML	7938128	DNHD1: dynein heavy chain domain 1		-2.38924	0.00199601	0.0213908	0.035321	1	1	1	1.01722	3.08377	0.0291387	3.13687	0.0251544
32090	2221	ML	7933638	FLJ31958: uncharacterized LOC143153		-3.56001	0.00199601	0.0213908	0.035321	1	1	1	1.01721	2.86627	0.0187663	2.9156	0.0149643
32489	1466	ML	7964677	C12orf66: chromosome 12 open reading frame 66		-4.18022	0.00199601	0.0213908	0.035321	1	1	1	1.01721	3.05223	0.0176322	3.10477	0.0127634
32927	638	ML	7952408	SIAE: sialic acid acetylesterase		-5.52189	0.00199601	0.0213908	0.035321	1	1	1	1.01721	2.88633	0.0155593	2.936	0.000781025
30870	4855	ML	7921358	OR10T1P: olfactory receptor, family 10, subfamily T, member 1 pseudogene		-2.47886	0.00199601	0.0213908	0.035321	1	1	1	1.0172	2.70567	0.00379781	2.7522	0.0322916
32548	1351	ML	8006788	MLLT6: myeloid/lymphoid or mixed-lineage leukemia (trithorax homolog, Drosophila); translocated to, 6		-4.28611	0.00199601	0.0213908	0.035321	1	1	1	1.0172	3.11873	0.0187281	3.17237	0.0109089
33082	353	ML	7935780	SEC31B: SEC31 homolog B (S. cerevisiae)		-6.64178	0.00199601	0.0213908	0.035321	1	1	1	1.01718	2.9655	0.0132045	3.01643	0.00143643
31673	3060	ML	7960817	ENST00000485834: ncrna_pseudogene:Mt_tRNA_pseudogene chromosome:GRCh37:12:7779153:7779220:-1 gene:ENSG00000239363 gene_biotype:Mt_tRNA_pseudogene transcript_biotype:Mt_tRNA_pseudogene		-3.1182	0.00199601	0.0213908	0.035321	1	1	1	1.01715	1.6752	0.0129256	1.70393	0.00936287
32082	2235	ML	8047419	CASP8: caspase 8, apoptosis-related cysteine peptidase		-3.55159	0.00199601	0.0213908	0.035321	1	1	1	1.01709	3.00107	0.0243274	3.05237	0.00583809
32205	1979	ML	8102532	PDE5A: phosphodiesterase 5A, cGMP-specific		-3.72962	0.00199601	0.0213908	0.035321	1	1	1	1.01709	3.1328	0.0233506	3.18633	0.00853366
30626	5431	ML	8176951	ANKRD36P1: ankyrin repeat domain 36 pseudogene 1		-2.33386	0.00199601	0.0213908	0.035321	1	1	1	1.01707	2.1875	0.0135399	2.22483	0.0241728
32006	2377	ML	7964089	PAN2: PAN2 poly(A) specific ribonuclease subunit homolog (S. cerevisiae)		-3.46187	0.00199601	0.0213908	0.035321	1	1	1	1.01704	3.29187	0.0262763	3.34797	0.00986779
32876	738	ML	7905677	CREB3L4: cAMP responsive element binding protein 3-like 4		-5.24139	0.00199601	0.0213908	0.035321	1	1	1	1.01703	3.0232	0.00993529	3.0747	0.0138174
29666	7732	ML	8092883	AK091192: Homo sapiens cDNA FLJ33873 fis, clone CTONG2006942.		-1.8826	0.00199601	0.0213908	0.035321	1	1	1	1.01703	2.2591	0.0219126	2.29757	0.0277907
30997	4549	ML	8088172	ENST00000485848: ncrna_pseudogene:snRNA_pseudogene chromosome:GRCh37:3:54100888:54101014:-1 gene:ENSG00000244195 gene_biotype:snRNA_pseudogene transcript_biotype:snRNA_pseudogene		-2.57466	0.00199601	0.0213908	0.035321	1	1	1	1.01702	2.70907	0.0283594	2.75517	0.0125516
32226	1939	ML	7986132	MAN2A2: mannosidase, alpha, class 2A, member 2		-3.7621	0.00199601	0.0213908	0.035321	1	1	1	1.01701	3.10673	0.0196632	3.15957	0.0143186
30538	5636	ML	7896709	7896709: unannotated transcript: ---:-------		-2.28738	0.00199601	0.0213908	0.035321	1	1	1	1.017	3.23333	0.0207389	3.2883	0.0360871
29799	7403	ML	7943282	KDM4D: lysine (K)-specific demethylase 4D		-1.93526	0.00199601	0.0213908	0.035321	1	1	1	1.01698	3.00637	0.0441236	3.0574	0.0118013
32592	1262	ML	8055941	RPRM: reprimo, TP53 dependent G2 arrest mediator candidate		-4.40084	0.00199601	0.0213908	0.035321	1	1	1	1.01697	3.24607	0.00767941	3.30117	0.0202806
32627	1200	ML	8004671	KDM6B: lysine (K)-specific demethylase 6B		-4.46846	0.00199601	0.0213908	0.035321	1	1	1	1.01696	3.1025	0.010143	3.15513	0.0177015
30353	6050	ML	7984011	FOXB1: forkhead box B1		-2.19718	0.00199601	0.0213908	0.035321	1	1	1	1.01694	3.23797	0.0387229	3.29283	0.0192677
32494	1445	ML	7991216	DET1: de-etiolated homolog 1 (Arabidopsis)		-4.20204	0.00199601	0.0213908	0.035321	1	1	1	1.0169	3.05073	0.0202535	3.1023	0.00644903
31749	2907	ML	8097062	ENST00000411293: ncrna:snRNA chromosome:GRCh37:4:119527605:119527708:1 gene:ENSG00000223225 gene_biotype:snRNA transcript_biotype:snRNA		-3.18158	0.00199601	0.0213908	0.035321	1	1	1	1.01689	3.2132	0.0235663	3.26747	0.0178158
31349	3742	ML	8106986	RHOBTB3: Rho-related BTB domain containing 3		-2.82125	0.00199601	0.0213908	0.035321	1	1	1	1.01688	3.23807	0.0215224	3.29273	0.025752
32982	539	ML	8164002	ZBTB26: zinc finger and BTB domain containing 26		-5.85022	0.00199601	0.0213908	0.035321	1	1	1	1.01688	3.11473	0.00320052	3.1673	0.0152306
30676	5302	ML	8019954	FLJ35776: uncharacterized LOC649446		-2.36615	0.00199601	0.0213908	0.035321	1	1	1	1.01688	2.88763	0.016869	2.93637	0.0314328
31611	3176	ML	8046408	PDK1: pyruvate dehydrogenase kinase, isozyme 1		-3.05527	0.00199601	0.0213908	0.035321	1	1	1	1.01688	3.4152	0.024597	3.47283	0.0215057
32165	2071	ML	8078196	KCNH8: potassium voltage-gated channel, subfamily H (eag-related), member 8		-3.65808	0.00199601	0.0213908	0.035321	1	1	1	1.01687	2.88037	0.0141846	2.92897	0.0181197
33287	15	ML	8008064	PNPO: pyridoxamine 5'-phosphate oxidase		-14.32	0.00199601	0.0213908	0.035321	1	0.895	0.895	1.01687	3.13993	0.00525389	3.1929	0.00366606
30865	4863	ML	8005751	ENST00000483901: ncrna_pseudogene:Mt_tRNA_pseudogene chromosome:GRCh37:17:22023985:22024059:1 gene:ENSG00000243655 gene_biotype:Mt_tRNA_pseudogene transcript_biotype:Mt_tRNA_pseudogene		-2.47706	0.00199601	0.0213908	0.035321	1	1	1	1.01687	2.72947	0.0242918	2.7755	0.0211185
32347	1711	ML	7932744	ARMC4: armadillo repeat containing 4		-3.96154	0.00199601	0.0213908	0.035321	1	1	1	1.01684	2.90047	0.01194	2.9493	0.0177
31756	2899	ML	8166723	XK: X-linked Kx blood group (McLeod syndrome)		-3.18612	0.00199601	0.0213908	0.035321	1	1	1	1.01682	2.92627	0.0238599	2.9755	0.012126
31861	2672	ML	7927915	STOX1: storkhead box 1		-3.30246	0.00199601	0.0213908	0.035321	1	1	1	1.01681	2.9511	0.0096286	3.0007	0.0241663
31065	4395	ML	8074606	USP41: ubiquitin specific peptidase 41		-2.62134	0.00199601	0.0213908	0.035321	1	1	1	1.0168	3.02903	0.0323528	3.07993	0.00918822
32588	1268	ML	8011093	SLC43A2: solute carrier family 43, member 2		-4.39705	0.00199601	0.0213908	0.035321	1	1	1	1.0168	3.06687	0.0180959	3.1184	0.00919837
30784	5052	ML	8008711	OR4D1: olfactory receptor, family 4, subfamily D, member 1		-2.42502	0.00199601	0.0213908	0.035321	1	1	1	1.0168	2.50557	0.00891142	2.54767	0.0287187
30671	5315	ML	7933982	PBLD: phenazine biosynthesis-like protein domain containing		-2.36206	0.00199601	0.0213908	0.035321	1	1	1	1.0168	2.71613	0.0183873	2.76177	0.0279573
31599	3208	ML	8163491	WDR31: WD repeat domain 31		-3.04035	0.00199601	0.0213908	0.035321	1	1	1	1.01678	2.79763	0.0167816	2.84457	0.020815
32345	1718	ML	8175076	ZNF280C: zinc finger protein 280C		-3.95721	0.00199601	0.0213908	0.035321	1	1	1	1.01676	3.3311	0.0230688	3.38693	0.00806494
31342	3757	ML	8103374	ENST00000487152: ncrna_pseudogene:Mt_tRNA_pseudogene chromosome:GRCh37:4:156384978:156385052:-1 gene:ENSG00000244463 gene_biotype:Mt_tRNA_pseudogene transcript_biotype:Mt_tRNA_pseudogene		-2.81639	0.00199601	0.0213908	0.035321	1	1	1	1.01674	2.80317	0.0194898	2.8501	0.0212897
32623	1206	ML	8110960	TAS2R1: taste receptor, type 2, member 1		-4.46488	0.00199601	0.0213908	0.035321	1	1	1	1.01674	2.52657	0.0149286	2.56887	0.006812
32323	1763	ML	7939975	OR5T1: olfactory receptor, family 5, subfamily T, member 1		-3.90885	0.00199601	0.0213908	0.035321	1	1	1	1.01673	1.93413	0.00889963	1.9665	0.0112468
30754	5135	ML	8080640	SPATA12: spermatogenesis associated 12		-2.40687	0.00199601	0.0213908	0.035321	1	1	1	1.01673	2.616	0.0191948	2.65977	0.0249708
32322	1764	ML	7904396	HAO2: hydroxyacid oxidase 2 (long chain)		-3.90849	0.00199601	0.0213908	0.035321	1	1	1	1.01673	2.63257	0.0179767	2.6766	0.00759013
33205	158	ML	7897520	ENST00000365545: ncrna:misc_RNA chromosome:GRCh37:1:10007376:10007694:1 gene:ENSG00000202415 gene_biotype:misc_RNA transcript_biotype:misc_RNA		-8.25504	0.00199601	0.0213908	0.035321	1	1	1	1.0167	2.86483	0.0100002	2.91267	0.00085049
32977	551	ML	8103043	SLC10A7: solute carrier family 10 (sodium/bile acid cotransporter family), member 7		-5.80825	0.00199601	0.0213908	0.035321	1	1	1	1.0167	3.11443	0.0093874	3.16643	0.0123423
32004	2380	ML	7981068	SERPINA1: serpin peptidase inhibitor, clade A (alpha-1 antiproteinase, antitrypsin), member 1		-3.46008	0.00199601	0.0213908	0.035321	1	1	1	1.0167	2.61553	0.00967695	2.6592	0.0196
32925	642	ML	7964413	R3HDM2: R3H domain containing 2		-5.51152	0.00199601	0.0213908	0.035321	1	1	1	1.0167	3.27243	0.016354	3.32707	0.00522717
31304	3862	ML	8161326	ZNF658: zinc finger protein 658		-2.78528	0.00199601	0.0213908	0.035321	1	1	1	1.01668	2.8824	0.0298126	2.93047	0.00215948
33129	274	ML	8012450	SLC25A35: solute carrier family 25, member 35		-7.13087	0.00199601	0.0213908	0.035321	1	1	1	1.01667	2.91943	0.00928781	2.9681	0.00731232
32194	1997	ML	8127872	SNAP91: synaptosomal-associated protein, 91kDa homolog (mouse)		-3.7204	0.00199601	0.0213908	0.035321	1	1	1	1.01667	2.94413	0.0178724	2.9932	0.0142264
31341	3758	ML	8053648	KRCC1: lysine-rich coiled-coil 1		-2.81637	0.00199601	0.0213908	0.035321	1	1	1	1.01665	3.04933	0.0123391	3.1001	0.0286794
30295	6215	ML	8137466	ENST00000517279: ncrna:misc_RNA chromosome:GRCh37:7:152099865:152099978:1 gene:ENSG00000253088 gene_biotype:misc_RNA transcript_biotype:misc_RNA		-2.16042	0.00199601	0.0213908	0.035321	1	1	1	1.01662	2.1094	0.0027074	2.14447	0.0279829
29876	7255	ML	7965264	CEP290: centrosomal protein 290kDa		-1.9635	0.00199601	0.0213908	0.035321	1	1	1	1.01662	2.8443	0.0028931	2.89157	0.0415945
31674	3059	ML	7893761	7893761: unannotated transcript: ---:-------		-3.11911	0.00199601	0.0213908	0.035321	1	1	1	1.0166	3.0676	0.024321	3.11853	0.0144376
31663	3076	ML	8113050	CETN3: centrin, EF-hand protein, 3		-3.10731	0.00199601	0.0213908	0.035321	1	1	1	1.01658	3.0151	0.0249006	3.0651	0.0125192
32620	1210	ML	8130891	WDR27: WD repeat domain 27		-4.46345	0.00199601	0.0213908	0.035321	1	1	1	1.01657	3.15337	0.00606987	3.20563	0.0193526
29849	7309	ML	8114273	TRPC7: transient receptor potential cation channel, subfamily C, member 7		-1.95383	0.00199601	0.0213908	0.035321	1	1	1	1.01655	2.332	0.0331782	2.3706	0.00837377
33186	184	ML	7962112	CAPRIN2: caprin family member 2		-7.90829	0.00199601	0.0213908	0.035321	1	1	1	1.01655	3.14277	0.010777	3.19477	0.00368284
30486	5753	ML	8138381	AGR2: anterior gradient 2 homolog (Xenopus laevis)		-2.25791	0.00199601	0.0213908	0.035321	1	1	1	1.01655	2.22817	0.00977872	2.26503	0.0265361
32016	2357	ML	7972546	GAPDHP22: glyceraldehyde 3 phosphate dehydrogenase pseudogene 22		-3.47764	0.00199601	0.0213908	0.035321	1	1	1	1.01654	2.86553	0.020405	2.91293	0.0118728
30385	5994	ML	8140752	ABCB4: ATP-binding cassette, sub-family B (MDR/TAP), member 4		-2.20774	0.00199601	0.0213908	0.035321	1	1	1	1.01647	2.64257	0.033053	2.6861	0.0086
30422	5909	ML	7990987	AP3B2: adaptor-related protein complex 3, beta 2 subunit		-2.22438	0.00199601	0.0213908	0.035321	1	1	1	1.01647	3.07393	0.00223681	3.12457	0.039363
29672	7716	ML	8030292	DKKL1: dickkopf-like 1		-1.88473	0.00199601	0.0213908	0.035321	1	1	1	1.01645	2.75753	0.0346962	2.8029	0.0231162
31401	3631	ML	7930304	GSTO1: glutathione S-transferase omega 1		-2.86286	0.00199601	0.0213908	0.035321	1	1	1	1.01645	3.35527	0.0278515	3.41047	0.0184286
32447	1550	ML	8051547	PRKD3: protein kinase D3		-4.09508	0.00199601	0.0213908	0.035321	1	1	1	1.01643	3.14127	0.0173685	3.19287	0.0132156
29616	7855	ML	8170648	BGN: biglycan		-1.86378	0.00199601	0.0213908	0.035321	1	1	1	1.01639	3.17407	0.0315376	3.2261	0.0366557
29467	8272	ML	8017257	ENST00000459173: ncrna:snoRNA chromosome:GRCh37:17:59039151:59039254:-1 gene:ENSG00000238799 gene_biotype:snoRNA transcript_biotype:snoRNA		-1.80268	0.00199601	0.0213908	0.035321	1	1	1	1.01639	2.18203	0.00914677	2.2178	0.0331257
31216	4061	ML	8068660	ENST00000384418: ncrna:snoRNA chromosome:GRCh37:21:41885071:41885206:1 gene:ENSG00000207147 gene_biotype:snoRNA transcript_biotype:snoRNA		-2.71877	0.00199601	0.0213908	0.035321	1	1	1	1.01638	2.13823	0.013102	2.17327	0.0180683
33224	133	ML	7921033	IQGAP3: IQ motif containing GTPase activating protein 3		-8.58557	0.00199601	0.0213908	0.035321	1	1	1	1.01636	3.156	0.00173205	3.20763	0.0102715
29196	8953	ML	7939463	MIR129-2: microRNA 129-2		-1.70421	0.00199601	0.0213908	0.035321	1	1	1	1.01631	2.2886	0.0378063	2.32593	0.00321921
31920	2567	ML	8142524	TSPAN12: tetraspanin 12		-3.36437	0.00199601	0.0213908	0.035321	1	1	1	1.0163	3.19797	0.0145974	3.2501	0.0225227
32987	528	ML	7935865	POLL: polymerase (DNA directed), lambda		-5.89957	0.00199601	0.0213908	0.035321	1	1	1	1.0163	3.06797	0.0137449	3.11797	0.00515396
32208	1974	ML	8177061	AMELY: amelogenin, Y-linked		-3.73938	0.00199601	0.0213908	0.035321	1	1	1	1.01627	2.38427	0.0160612	2.42307	0.0080637
31685	3033	ML	8081686	BOC: Boc homolog (mouse)		-3.12842	0.00199601	0.0213908	0.035321	1	1	1	1.01627	2.95503	0.013405	3.0031	0.0229893
30762	5107	ML	7929511	ENTPD1: ectonucleoside triphosphate diphosphohydrolase 1		-2.41317	0.00199601	0.0213908	0.035321	1	1	1	1.01625	2.919	0.023018	2.96643	0.0250847
33289	12	ML	7965156	LIN7A: lin-7 homolog A (C. elegans)		-14.7431	0.00199601	0.0213908	0.035321	1	0.895	0.895	1.01625	2.9197	0.00381182	2.96713	0.00406489
33271	41	ML	8080001	HEMK1: HemK methyltransferase family member 1		-11.0667	0.00199601	0.0213908	0.035321	1	1	1	1.01621	3.018	0.00350856	3.06693	0.00680759
30568	5573	ML	7915775	IPP: intracisternal A particle-promoted polypeptide		-2.30243	0.00199601	0.0213908	0.035321	1	1	1	1.01618	3.13747	0.0309434	3.18823	0.0223831
32108	2186	ML	8150565	RNF170: ring finger protein 170		-3.58605	0.00199601	0.0213908	0.035321	1	1	1	1.01616	3.19847	0.0233603	3.25017	0.00882289
32263	1877	ML	8145027	FAM160B2: family with sequence similarity 160, member B2		-3.80896	0.00199601	0.0213908	0.035321	1	1	1	1.01615	3.12863	0.016662	3.17917	0.0158245
32906	674	ML	8178234	HSD17B8: hydroxysteroid (17-beta) dehydrogenase 8		-5.41742	0.00199601	0.0213908	0.035321	1	1	1	1.01615	2.99893	0.0151133	3.04737	0.00337244
32907	676	ML	8179534	HSD17B8: hydroxysteroid (17-beta) dehydrogenase 8		-5.41742	0.00199601	0.0213908	0.035321	1	1	1	1.01615	2.99893	0.0151133	3.04737	0.00337244
32908	675	ML	8118622	HSD17B8: hydroxysteroid (17-beta) dehydrogenase 8		-5.41742	0.00199601	0.0213908	0.035321	1	1	1	1.01615	2.99893	0.0151133	3.04737	0.00337244
31964	2458	ML	8168045	EFNB1: ephrin-B1		-3.41656	0.00199601	0.0213908	0.035321	1	1	1	1.01615	3.01987	0.00906661	3.06863	0.0230001
30545	5621	ML	7956878	IRAK3: interleukin-1 receptor-associated kinase 3		-2.2906	0.00199601	0.0213908	0.035321	1	1	1	1.01614	2.6593	0.0285154	2.70223	0.0155178
31777	2854	ML	8108737	PCDHB13: protocadherin beta 13		-3.20383	0.00199601	0.0213908	0.035321	1	1	1	1.01614	2.88873	0.0118395	2.93537	0.0222579
33266	57	ML	8017702	ENST00000489005: ncrna_pseudogene:scRNA_pseudogene chromosome:GRCh37:17:62867623:62867898:-1 gene:ENSG00000239507 gene_biotype:scRNA_pseudogene transcript_biotype:scRNA_pseudogene		-10.1805	0.00199601	0.0213908	0.035321	1	1	1	1.01614	2.89333	0.00542248	2.94003	0.00580718
32615	1219	ML	8149228	LOC349196: uncharacterized LOC349196		-4.4539	0.00199601	0.0213908	0.035321	1	1	1	1.01614	2.9475	0.0180311	2.99507	0.00412957
32103	2194	ML	7928107	H2AFY2: H2A histone family, member Y2		-3.57637	0.00199601	0.0213908	0.035321	1	1	1	1.01613	3.39087	0.00804073	3.44557	0.0252417
31876	2646	ML	8166469	SAT1: spermidine/spermine N1-acetyltransferase 1		-3.31388	0.00199601	0.0213908	0.035321	1	1	1	1.01612	3.32827	0.0134113	3.38193	0.0246358
30414	5925	ML	7989069	PYGO1: pygopus homolog 1 (Drosophila)		-2.21981	0.00199601	0.0213908	0.035321	1	1	1	1.01611	2.7709	0.017287	2.81553	0.0302327
31311	3845	ML	7916789	WDR78: WD repeat domain 78		-2.79152	0.00199601	0.0213908	0.035321	1	1	1	1.01609	2.38687	0.0153904	2.42527	0.0181883
29756	7509	ML	8058542	C2orf80: chromosome 2 open reading frame 80		-1.91949	0.00199601	0.0213908	0.035321	1	1	1	1.01606	2.5963	0.028621	2.638	0.0244276
33281	27	ML	7994981	ORAI3: ORAI calcium release-activated calcium modulator 3		-11.9749	0.00199601	0.0213908	0.035321	1	1	1	1.01605	3.15943	0.00366106	3.21013	0.006354
31029	4483	ML	8176570	DUX4L7: double homeobox 4 like 7		-2.59423	0.00199601	0.0213908	0.035321	1	1	1	1.01602	3.09773	0.0134656	3.14737	0.0302788
32409	1624	ML	7900999	C1orf228: chromosome 1 open reading frame 228		-4.03413	0.00199601	0.0213908	0.035321	1	1	1	1.01601	2.8875	0.0112334	2.93373	0.0163659
32594	1252	ML	7944913	CCDC15: coiled-coil domain containing 15		-4.41083	0.00199601	0.0213908	0.035321	1	1	1	1.01596	2.8621	0.0140801	2.90777	0.0111051
31417	3583	ML	8139873	8139873: unannotated transcript: chr7:65841044-65865395		-2.88545	0.00199601	0.0213908	0.035321	1	1	1	1.01595	2.8728	0.00854927	2.91863	0.0261504
28899	9656	ML	8121225	GRIK2: glutamate receptor, ionotropic, kainate 2		-1.61931	0.00199601	0.0213908	0.035321	1	1	1	1.01594	2.94597	0.0350543	2.99293	0.0359848
31521	3350	ML	7990729	CHRNB4: cholinergic receptor, nicotinic, beta 4 (neuronal)		-2.98069	0.00199601	0.0213908	0.035321	1	1	1	1.01594	3.03057	0.012303	3.07887	0.0252264
32567	1315	ML	8077958	HDAC11: histone deacetylase 11		-4.3221	0.00199601	0.0213908	0.035321	1	1	1	1.01592	2.9823	0.0184307	3.02977	0.00470567
32218	1959	ML	7988789	DMXL2: Dmx-like 2		-3.75042	0.00199601	0.0213908	0.035321	1	1	1	1.01588	3.20753	0.0157906	3.25847	0.0174345
33181	193	ML	7935882	FBXW4: F-box and WD repeat domain containing 4		-7.86789	0.00199601	0.0213908	0.035321	1	1	1	1.01587	3.20827	0.00762255	3.25917	0.008213
31091	4336	ML	7982076	SNORD115-35: small nucleolar RNA, C/D box 115-35		-2.63566	0.00199601	0.0213908	0.035321	1	1	1	1.01584	1.7462	0.0146734	1.77387	0.0107356
30751	5145	ML	7938590	7938590: unannotated transcript: chr11:13639651-13639739		-2.40418	0.00199601	0.0213908	0.035321	1	1	1	1.01583	2.28837	0.0239118	2.3246	0.0104704
32439	1565	ML	7996198	CCDC113: coiled-coil domain containing 113		-4.07854	0.00199601	0.0213908	0.035321	1	1	1	1.01578	3.0503	0.0154852	3.09843	0.0133433
31302	3865	ML	7942135	ANO1: anoctamin 1, calcium activated chloride channel		-2.78348	0.00199601	0.0213908	0.035321	1	1	1	1.01577	2.8664	0.0146427	2.9116	0.024014
30205	6445	ML	8121886	HINT3: histidine triad nucleotide binding protein 3		-2.10542	0.00199601	0.0213908	0.035321	1	1	1	1.01576	2.9806	0.00805419	3.02757	0.0377889
30206	6441	ML	7946115	OR52L1: olfactory receptor, family 52, subfamily L, member 1		-2.10716	0.00199601	0.0213908	0.035321	1	1	1	1.01575	2.67113	0.0263411	2.7132	0.0224007
32077	2243	ML	7913682	HMGCL: 3-hydroxymethyl-3-methylglutaryl-CoA lyase		-3.54805	0.00199601	0.0213908	0.035321	1	1	1	1.01573	3.09003	0.00567215	3.13863	0.023037
32069	2255	ML	7922250	SCYL3: SCY1-like 3 (S. cerevisiae)		-3.54299	0.00199601	0.0213908	0.035321	1	1	1	1.01572	3.09517	0.0237153	3.14383	0.00190351
31053	4432	ML	8111512	UGT3A1: UDP glycosyltransferase 3 family, polypeptide A1		-2.61096	0.00199601	0.0213908	0.035321	1	1	1	1.0157	2.95037	0.0218212	2.9967	0.0216465
32305	1792	ML	8102415	CAMK2D: calcium/calmodulin-dependent protein kinase II delta		-3.88442	0.00199601	0.0213908	0.035321	1	1	1	1.0157	3.2264	0.0116065	3.27707	0.0193828
32700	1085	ML	8009913	MYO15B: myosin XVB pseudogene		-4.62696	0.00199601	0.0213908	0.035321	1	1	1	1.0157	2.8947	0.0141361	2.94013	0.00945639
30462	5803	ML	7946380	TRIM66: tripartite motif containing 66		-2.24894	0.00199601	0.0213908	0.035321	1	1	1	1.01569	2.94607	0.0103636	2.9923	0.0340657
32484	1475	ML	7919197	POLR3GL: polymerase (RNA) III (DNA directed) polypeptide G (32kD)-like		-4.17201	0.00199601	0.0213908	0.035321	1	1	1	1.01569	2.79967	0.0172651	2.8436	0.00588133
31578	3247	ML	8030954	ZNF137P: zinc finger protein 137, pseudogene		-3.02414	0.00199601	0.0213908	0.035321	1	1	1	1.01567	2.75037	0.0151678	2.79347	0.0194755
30657	5350	ML	7930320	7930320: unannotated transcript: chr10:106113522-106214865		-2.35349	0.00199601	0.0213908	0.035321	1	1	1	1.01567	2.45753	0.0238462	2.49603	0.0153027
32374	1670	ML	8023882	ZNF516: zinc finger protein 516		-3.99946	0.00199601	0.0213908	0.035321	1	1	1	1.01566	3.08953	0.0205585	3.1379	0.00401123
32810	866	ML	8039674	ZNF154: zinc finger protein 154		-4.98893	0.00199601	0.0213908	0.035321	1	1	1	1.01564	3.1334	0.00753857	3.1824	0.0152502
31000	4538	ML	8010978	LOC100130876: uncharacterized LOC100130876		-2.57755	0.00199601	0.0213908	0.035321	1	1	1	1.01562	3.39003	0.0193702	3.443	0.0298598
31096	4319	ML	7935572	PYROXD2: pyridine nucleotide-disulphide oxidoreductase domain 2		-2.64425	0.00199601	0.0213908	0.035321	1	1	1	1.0156	2.89087	0.0287507	2.93597	0.00678994
32483	1476	ML	7953735	LOC349196: uncharacterized LOC349196		-4.17193	0.00199601	0.0213908	0.035321	1	1	1	1.01559	3.0126	0.0144212	3.05957	0.0131242
31615	3170	ML	8017736	CEP112: centrosomal protein 112kDa		-3.05905	0.00199601	0.0213908	0.035321	1	1	1	1.01558	2.7767	0.00849235	2.81997	0.0229788
32027	2333	ML	7899244	PIGV: phosphatidylinositol glycan anchor biosynthesis, class V		-3.49395	0.00199601	0.0213908	0.035321	1	1	1	1.01558	3.21417	0.0194973	3.26423	0.0153578
31887	2630	ML	8113403	GIN1: gypsy retrotransposon integrase 1		-3.32303	0.00199601	0.0213908	0.035321	1	1	1	1.01557	2.72767	0.011358	2.77013	0.0189985
32647	1168	ML	8169294	COL4A5: collagen, type IV, alpha 5		-4.50334	0.00199601	0.0213908	0.035321	1	1	1	1.01557	2.97847	0.0158544	3.02483	0.00816476
29449	8324	ML	8047159	ENST00000516321: ncrna:snRNA chromosome:GRCh37:2:192235664:192235770:1 gene:ENSG00000252130 gene_biotype:snRNA transcript_biotype:snRNA		-1.79628	0.00199601	0.0213908	0.035321	1	1	1	1.01554	2.5168	0.00505866	2.5559	0.0373609
31201	4087	ML	7945979	TRIM68: tripartite motif containing 68		-2.71159	0.00199601	0.0213908	0.035321	1	1	1	1.01553	3.14617	0.0301009	3.19503	0.00826156
31404	3624	ML	7905220	ECM1: extracellular matrix protein 1		-2.86874	0.00199601	0.0213908	0.035321	1	1	1	1.01553	2.8208	0.0234079	2.8646	0.0123049
32626	1201	ML	7899289	WDTC1: WD and tetratricopeptide repeats 1		-4.46563	0.00199601	0.0213908	0.035321	1	1	1	1.01553	3.16217	0.0132217	3.21127	0.0137063
33070	372	ML	7944463	NLRX1: NLR family member X1		-6.56934	0.00199601	0.0213908	0.035321	1	1	1	1.01552	3.10777	0.00649333	3.156	0.0109343
33253	87	ML	8167912	KLF8: Kruppel-like factor 8		-9.44894	0.00199601	0.0213908	0.035321	1	1	1	1.01551	2.96797	0.00291433	3.014	0.00791896
32445	1553	ML	7962185	AMN1: antagonist of mitotic exit network 1 homolog (S. cerevisiae)		-4.09303	0.00199601	0.0213908	0.035321	1	1	1	1.01549	3.11553	0.0190886	3.1638	0.00726705
29324	8644	ML	8041987	C2orf73: chromosome 2 open reading frame 73		-1.74552	0.00199601	0.0213908	0.035321	1	1	1	1.01548	2.315	0.0181868	2.35083	0.0305536
33023	453	ML	8095870	CCNG2: cyclin G2		-6.12841	0.00199601	0.0213908	0.035321	1	1	1	1.01544	3.15073	0.0108519	3.19937	0.00843584
32140	2110	ML	8041644	PLEKHH2: pleckstrin homology domain containing, family H (with MyTH4 domain) member 2		-3.63307	0.00199601	0.0213908	0.035321	1	1	1	1.01543	3.02317	0.010452	3.0698	0.0196222
32749	982	ML	7910589	KIAA1383: KIAA1383		-4.78894	0.00199601	0.0213908	0.035321	1	1	1	1.01542	2.99683	0.0163231	3.04303	0.00357258
31319	3822	ML	8126770	CYP39A1: cytochrome P450, family 39, subfamily A, polypeptide 1		-2.79656	0.00199601	0.0213908	0.035321	1	1	1	1.01539	2.73683	0.0205062	2.77897	0.0161389
31805	2791	ML	7940307	MS4A13: membrane-spanning 4-domains, subfamily A, member 13		-3.23724	0.00199601	0.0213908	0.035321	1	1	1	1.01539	1.79303	0.00700024	1.82063	0.0130024
32783	920	ML	8059801	USP40: ubiquitin specific peptidase 40		-4.87617	0.00199601	0.0213908	0.035321	1	1	1	1.01539	2.9712	0.010499	3.01693	0.0123961
31386	3671	ML	7909027	NFASC: neurofascin		-2.84916	0.00199601	0.0213908	0.035321	1	1	1	1.01537	3.15147	0.00846424	3.1999	0.0282005
32616	1218	ML	8009443	ARSG: arylsulfatase G		-4.45467	0.00199601	0.0213908	0.035321	1	1	1	1.01536	3.01173	0.01635	3.058	0.00750267
31511	3365	ML	7959267	P2RX4: purinergic receptor P2X, ligand-gated ion channel, 4		-2.97073	0.00199601	0.0213908	0.035321	1	1	1	1.01536	3.05513	0.0101633	3.10207	0.0254066
32294	1816	ML	7969916	BIVM: basic, immunoglobulin-like variable motif containing		-3.8659	0.00199601	0.0213908	0.035321	1	1	1	1.01536	3.05367	0.0206747	3.10057	0.00375411
31015	4507	ML	7916570	OMA1: OMA1 zinc metallopeptidase homolog (S. cerevisiae)		-2.58672	0.00199601	0.0213908	0.035321	1	1	1	1.01535	3.08697	0.0305782	3.13437	0.00850431
30653	5362	ML	7896529	7896529: unannotated transcript: ---:-------		-2.35085	0.00199601	0.0213908	0.035321	1	1	1	1.01534	3.2193	0.0358124	3.2687	0.00649538
30833	4933	ML	8168749	SRPX2: sushi-repeat containing protein, X-linked 2		-2.45895	0.00199601	0.0213908	0.035321	1	1	1	1.01533	2.60737	0.0085096	2.64733	0.0268351
31435	3551	ML	7901497	ZYG11A: zyg-11 homolog A (C. elegans)		-2.89769	0.00199601	0.0213908	0.035321	1	1	1	1.01532	2.9924	0.0204184	3.03823	0.0182659
32862	766	ML	8177628	CCDC125: coiled-coil domain containing 125		-5.17717	0.00199601	0.0213908	0.035321	1	1	1	1.01531	3.04783	0.0139844	3.0945	0.0069419
32675	1122	ML	8113413	NUDT12: nudix (nucleoside diphosphate linked moiety X)-type motif 12		-4.58378	0.00199601	0.0213908	0.035321	1	1	1	1.01528	3.14313	0.0164077	3.19117	0.00775973
29039	9299	ML	8006706	C17orf78: chromosome 17 open reading frame 78		-1.66219	0.00199601	0.0213908	0.035321	1	1	1	1.01527	2.2142	0.0157038	2.248	0.0315259
31181	4139	ML	8059650	SP110: SP110 nuclear body protein		-2.69756	0.00199601	0.0213908	0.035321	1	1	1	1.01526	2.87773	0.0255065	2.92163	0.0119976
31489	3424	ML	8129254	MAN1A1: mannosidase, alpha, class 1A, member 1		-2.9495	0.00199601	0.0213908	0.035321	1	1	1	1.01525	3.00533	0.017228	3.05117	0.0206788
31268	3930	ML	7893109	7893109: unannotated transcript: ---:-------		-2.76202	0.00199601	0.0213908	0.035321	1	1	1	1.01522	2.3277	0.0176808	2.36313	0.0134582
33193	175	ML	7913883	PAFAH2: platelet-activating factor acetylhydrolase 2, 40kDa		-7.98518	0.00199601	0.0213908	0.035321	1	1	1	1.01521	3.09447	0.0100012	3.14153	0.0020502
31968	2451	ML	8088219	FAM208A: family with sequence similarity 208, member A		-3.42043	0.00199601	0.0213908	0.035321	1	1	1	1.01519	3.12637	0.00946485	3.17387	0.0221127
31039	4459	ML	8140686	SEMA3D: sema domain, immunoglobulin domain (Ig), short basic domain, secreted, (semaphorin) 3D		-2.60313	0.00199601	0.0213908	0.035321	1	1	1	1.01517	2.91103	0.0147141	2.9552	0.0254384
32013	2364	ML	8103622	CBR4: carbonyl reductase 4		-3.47218	0.00199601	0.0213908	0.035321	1	1	1	1.01516	3.25483	0.023546	3.30417	0.00715565
33226	131	ML	8010050	FAM100B: family with sequence similarity 100, member B		-8.68023	0.00199601	0.0213908	0.035321	1	1	1	1.01515	3.14627	0.00132035	3.19393	0.00941931
29971	7028	ML	7911056	C1orf101: chromosome 1 open reading frame 101		-1.99725	0.00199601	0.0213908	0.035321	1	1	1	1.01513	2.4361	0.0301458	2.47297	0.0106491
32880	730	ML	7926223	CAMK1D: calcium/calmodulin-dependent protein kinase ID		-5.25716	0.00199601	0.0213908	0.035321	1	1	1	1.01513	3.07367	0.0145548	3.12017	0.00478156
31128	4250	ML	7899069	ENST00000384572: ncrna:misc_RNA chromosome:GRCh37:1:26203987:26204096:1 gene:ENSG00000207302 gene_biotype:misc_RNA transcript_biotype:misc_RNA		-2.66584	0.00199601	0.0213908	0.035321	1	1	1	1.01512	2.2732	0.0186904	2.30757	0.0122165
32366	1684	ML	7984961	GOLGA6A: golgin A6 family, member A		-3.98717	0.00199601	0.0213908	0.035321	1	1	1	1.0151	2.88673	0.0139579	2.93033	0.0128025
33223	134	ML	8134730	CNPY4: canopy 4 homolog (zebrafish)		-8.54579	0.00199601	0.0213908	0.035321	1	1	1	1.0151	2.86963	0.00726108	2.91297	0.00494099
32912	668	ML	8042195	AHSA2: AHA1, activator of heat shock 90kDa protein ATPase homolog 2 (yeast)		-5.43998	0.00199601	0.0213908	0.035321	1	1	1	1.0151	3.1412	0.0129105	3.18863	0.00783603
32071	2253	ML	8101893	ADH1C: alcohol dehydrogenase 1C (class I), gamma polypeptide		-3.54331	0.00199601	0.0213908	0.035321	1	1	1	1.01507	2.36037	0.0135552	2.39593	0.0108868
32617	1215	ML	7984276	SLC24A1: solute carrier family 24 (sodium/potassium/calcium exchanger), member 1		-4.45771	0.00199601	0.0213908	0.035321	1	1	1	1.01506	2.98657	0.00957932	3.03153	0.0146118
30470	5788	ML	8070757	TSPEAR: thrombospondin-type laminin G domain and EAR repeats		-2.25077	0.00199601	0.0213908	0.035321	1	1	1	1.01505	2.99833	0.0251534	3.04347	0.02395
32565	1318	ML	7975607	ACOT4: acyl-CoA thioesterase 4		-4.32027	0.00199601	0.0213908	0.035321	1	1	1	1.01503	2.74727	0.00791096	2.78857	0.0145456
32942	612	ML	7990309	STRA6: stimulated by retinoic acid gene 6 homolog (mouse)		-5.59725	0.00199601	0.0213908	0.035321	1	1	1	1.01502	3.18867	0.0127084	3.23657	0.00762911
30524	5660	ML	8170803	TMEM187: transmembrane protein 187		-2.28085	0.00199601	0.0213908	0.035321	1	1	1	1.01501	2.89103	0.0288656	2.93443	0.0159051
30225	6381	ML	8057615	DIRC1: disrupted in renal carcinoma 1		-2.12122	0.00199601	0.0213908	0.035321	1	1	1	1.01501	2.38043	0.0287006	2.41617	0.00525389
32215	1962	ML	8075423	DUSP18: dual specificity phosphatase 18		-3.74834	0.00199601	0.0213908	0.035321	1	1	1	1.015	2.92467	0.0131367	2.96853	0.0154371
30957	4643	ML	8155591	ANKRD20A8P: ankyrin repeat domain 20 family, member A8, pseudogene		-2.54855	0.00199601	0.0213908	0.035321	1	1	1	1.01499	2.53933	0.0240519	2.5774	0.00952943
31534	3316	ML	7905339	GABPB2: GA binding protein transcription factor, beta subunit 2		-2.99426	0.00199601	0.0213908	0.035321	1	1	1	1.01498	2.819	0.0240763	2.86123	0.00414287
30248	6312	ML	8029347	ZNF230: zinc finger protein 230		-2.13463	0.00199601	0.0213908	0.035321	1	1	1	1.01497	2.7181	0.0124724	2.7588	0.0305784
30223	6391	ML	7921360	OR6Y1: olfactory receptor, family 6, subfamily Y, member 1		-2.11911	0.00199601	0.0213908	0.035321	1	1	1	1.01497	2.66537	0.0246173	2.70527	0.0213903
32173	2052	ML	7906930	NUF2: NUF2, NDC80 kinetochore complex component, homolog (S. cerevisiae)		-3.67119	0.00199601	0.0213908	0.035321	1	1	1	1.01497	3.2269	0.0199095	3.2752	0.0110856
31569	3261	ML	8125959	SLC26A8: solute carrier family 26, member 8		-3.01846	0.00199601	0.0213908	0.035321	1	1	1	1.01497	2.6368	0.00771557	2.67627	0.0212919
33083	351	ML	7988438	ENST00000459592: ncrna:snoRNA chromosome:GRCh37:15:45783782:45783885:-1 gene:ENSG00000238583 gene_biotype:snoRNA transcript_biotype:snoRNA		-6.65187	0.00199601	0.0213908	0.035321	1	1	1	1.01496	1.7686	0.00438634	1.79507	0.00531539
32344	1720	ML	8144082	C7orf13: chromosome 7 open reading frame 13		-3.95225	0.00199601	0.0213908	0.035321	1	1	1	1.01494	2.89623	0.012994	2.9395	0.0138091
29953	7079	ML	8157534	CNTRL: centriolin		-1.99074	0.00199601	0.0213908	0.035321	1	1	1	1.01494	2.84717	0.0269582	2.8897	0.0253519
31741	2926	ML	7968999	NUDT15: nudix (nucleoside diphosphate linked moiety X)-type motif 15		-3.1718	0.00199601	0.0213908	0.035321	1	1	1	1.01492	3.2357	0.0260674	3.28397	0.00389915
33244	99	ML	7923812	RAB7L1: RAB7, member RAS oncogene family-like 1		-9.15465	0.00199601	0.0213908	0.035321	1	1	1	1.01492	3.10613	0.00791223	3.15247	0.00377403
32532	1379	ML	8171172	MXRA5: matrix-remodelling associated 5		-4.25587	0.00199601	0.0213908	0.035321	1	1	1	1.01492	2.9454	0.0120312	2.98933	0.0132266
31281	3910	ML	7987405	RASGRP1: RAS guanyl releasing protein 1 (calcium and DAG-regulated)		-2.76614	0.00199601	0.0213908	0.035321	1	1	1	1.0149	2.99343	0.0260097	3.03803	0.0101687
30648	5373	ML	8098547	ENST00000515930: ncrna:snRNA chromosome:GRCh37:4:184627084:184627184:1 gene:ENSG00000251739 gene_biotype:snRNA transcript_biotype:snRNA		-2.34889	0.00199601	0.0213908	0.035321	1	1	1	1.01489	2.86193	0.022743	2.90453	0.0216685
28863	9736	ML	8054412	GENSCAN00000014309: cdna:genscan chromosome:GRCh37:2:106886396:106905560:-1 transcript_biotype:protein_coding		-1.60923	0.00199601	0.0213908	0.035321	1	1	1	1.01485	2.31267	0.0351649	2.347	0.0113583
32378	1665	ML	8006865	PPP1R1B: protein phosphatase 1, regulatory (inhibitor) subunit 1B		-4.00491	0.00199601	0.0213908	0.035321	1	1	1	1.01482	3.08833	0.00606163	3.1341	0.0188422
32454	1537	ML	7900857	ST3GAL3: ST3 beta-galactoside alpha-2,3-sialyltransferase 3		-4.11211	0.00199601	0.0213908	0.035321	1	1	1	1.01481	3.0911	0.0165756	3.13687	0.00984192
32654	1154	ML	8154151	PPAPDC2: phosphatidic acid phosphatase type 2 domain containing 2		-4.52495	0.00199601	0.0213908	0.035321	1	1	1	1.01479	3.13237	0.00778802	3.1787	0.0159339
30984	4582	ML	7945086	TIRAP: toll-interleukin 1 receptor (TIR) domain containing adaptor protein		-2.56511	0.00199601	0.0213908	0.035321	1	1	1	1.01476	2.90793	0.0123553	2.95087	0.0262254
32333	1739	ML	7897441	H6PD: hexose-6-phosphate dehydrogenase (glucose 1-dehydrogenase)		-3.93554	0.00199601	0.0213908	0.035321	1	1	1	1.01475	3.09103	0.0172796	3.13663	0.0102065
33211	152	ML	8144239	FBXO25: F-box protein 25		-8.39563	0.00199601	0.0213908	0.035321	1	1	1	1.01471	3.05847	0.00916861	3.10347	0.00145717
33078	360	ML	8021966	ENOSF1: enolase superfamily member 1		-6.62083	0.00199601	0.0213908	0.035321	1	1	1	1.01471	3.18877	0.00793557	3.23567	0.00935753
31695	3013	ML	7955908	NCKAP1L: NCK-associated protein 1-like		-3.13564	0.00199601	0.0213908	0.035321	1	1	1	1.0147	2.39017	0.0193418	2.4253	0.00158745
31297	3871	ML	7964142	APOF: apolipoprotein F		-2.78054	0.00199601	0.0213908	0.035321	1	1	1	1.01466	2.4194	0.0117503	2.45487	0.0187089
32838	808	ML	7903565	GPSM2: G-protein signaling modulator 2		-5.10785	0.00199601	0.0213908	0.035321	1	1	1	1.01464	3.1418	0.00995942	3.1878	0.012005
31332	3796	ML	8168553	ENST00000391321: ncrna:snRNA chromosome:GRCh37:X:80156256:80156363:1 gene:ENSG00000212623 gene_biotype:snRNA transcript_biotype:snRNA		-2.80498	0.00199601	0.0213908	0.035321	1	1	1	1.0146	1.78047	0.0153709	1.80647	0.00463609
32055	2280	ML	7983173	CCNDBP1: cyclin D-type binding-protein 1		-3.52421	0.00199601	0.0213908	0.035321	1	1	1	1.0146	3.1012	0.00733008	3.14647	0.0210051
31265	3935	ML	8063551	SPO11: SPO11 meiotic protein covalently bound to DSB homolog (S. cerevisiae)		-2.7602	0.00199601	0.0213908	0.035321	1	1	1	1.01459	2.0863	0.00900722	2.11673	0.0168396
31309	3847	ML	8089723	ENST00000491078: ncrna_pseudogene:scRNA_pseudogene chromosome:GRCh37:3:116301457:116301677:-1 gene:ENSG00000241156 gene_biotype:scRNA_pseudogene transcript_biotype:scRNA_pseudogene		-2.79109	0.00199601	0.0213908	0.035321	1	1	1	1.01458	2.64907	0.00733848	2.6877	0.0228237
31870	2658	ML	8099200	JAKMIP1: janus kinase and microtubule interacting protein 1		-3.30689	0.00199601	0.0213908	0.035321	1	1	1	1.01457	2.95083	0.00484183	2.99383	0.0219955
31338	3773	ML	8145532	EPHX2: epoxide hydrolase 2, cytoplasmic		-2.81054	0.00199601	0.0213908	0.035321	1	1	1	1.01455	2.98213	0.00773649	3.02553	0.0256028
32064	2262	ML	8174820	C1GALT1C1: C1GALT1-specific chaperone 1		-3.5372	0.00199601	0.0213908	0.035321	1	1	1	1.01454	2.891	0.0104733	2.93303	0.0177184
33227	130	ML	7893968	7893968: unannotated transcript: ---:-------		-8.68086	0.00199601	0.0213908	0.035321	1	1	1	1.01454	3.20147	0.00590706	3.248	0.0071631
31939	2523	ML	8014326	RDM1: RAD52 motif 1		-3.38674	0.00199601	0.0213908	0.035321	1	1	1	1.01453	2.72977	0.0173828	2.76943	0.0104582
32996	506	ML	8069269	COL6A1: collagen, type VI, alpha 1		-5.96872	0.00199601	0.0213908	0.035321	1	1	1	1.01452	3.39963	0.0110315	3.449	0.00913947
31208	4074	ML	8142343	ENST00000459130: ncrna:snoRNA chromosome:GRCh37:7:110749324:110749413:-1 gene:ENSG00000238922 gene_biotype:snoRNA transcript_biotype:snoRNA		-2.71428	0.00199601	0.0213908	0.035321	1	1	1	1.01452	2.69723	0.0142047	2.7364	0.0205643
29994	6978	ML	7925821	ENST00000482377: ncrna_pseudogene:tRNA_pseudogene chromosome:GRCh37:10:969234:969312:1 gene:ENSG00000244092 gene_biotype:tRNA_pseudogene transcript_biotype:tRNA_pseudogene		-2.0058	0.00199601	0.0213908	0.035321	1	1	1	1.0145	2.01177	0.00739211	2.04093	0.0240768
32875	741	ML	8100145	COMMD8: COMM domain containing 8		-5.23904	0.00199601	0.0213908	0.035321	1	1	1	1.01449	3.0243	0.00574717	3.06813	0.0133031
32428	1586	ML	7992458	7992458: unannotated transcript: chr16:2063181-2063477		-4.06536	0.00199601	0.0213908	0.035321	1	1	1	1.01447	2.88453	0.00821969	2.92627	0.0157665
33166	214	ML	8020164	GNAL: guanine nucleotide binding protein (G protein), alpha activating activity polypeptide, olfactory type		-7.71473	0.00199601	0.0213908	0.035321	1	1	1	1.01445	3.42663	0.00260064	3.47613	0.0108048
32251	1893	ML	7930894	GRK5: G protein-coupled receptor kinase 5		-3.79953	0.00199601	0.0213908	0.035321	1	1	1	1.01444	2.96677	0.0187836	3.0096	0.00533292
32113	2176	ML	8078312	CMC1: COX assembly mitochondrial protein 1 homolog (S. cerevisiae)		-3.5953	0.00199601	0.0213908	0.035321	1	1	1	1.01443	2.8386	0.0108282	2.87957	0.0165001
32522	1400	ML	8162514	FANCC: Fanconi anemia, complementation group C		-4.24195	0.00199601	0.0213908	0.035321	1	1	1	1.0144	3.10107	0.00960278	3.14573	0.0155053
32832	819	ML	8022986	SYT4: synaptotagmin IV		-5.07873	0.00199601	0.0213908	0.035321	1	1	1	1.0144	2.74793	0.0106265	2.7875	0.00831625
30151	6597	ML	7917561	GBP4: guanylate binding protein 4		-2.07683	0.00199601	0.0213908	0.035321	1	1	1	1.01439	2.30783	0.0261974	2.34103	0.00896344
30602	5485	ML	7956987	SLC35E3: solute carrier family 35, member E3		-2.32329	0.00199601	0.0213908	0.035321	1	1	1	1.01438	2.35703	0.0222154	2.39093	0.01205
31027	4486	ML	7902205	IL12RB2: interleukin 12 receptor, beta 2		-2.59365	0.00199601	0.0213908	0.035321	1	1	1	1.01438	2.881	0.017512	2.92243	0.0214225
32535	1373	ML	7963590	CSAD: cysteine sulfinic acid decarboxylase		-4.25982	0.00199601	0.0213908	0.035321	1	1	1	1.01438	2.95753	0.0101619	3.00007	0.0139937
31616	3168	ML	7976544	TCL1B: T-cell leukemia/lymphoma 1B		-3.06014	0.00199601	0.0213908	0.035321	1	1	1	1.01436	2.8645	0.0124648	2.90563	0.0196638
33203	161	ML	8170027	DDX26B: DEAD/H (Asp-Glu-Ala-Asp/His) box polypeptide 26B		-8.21231	0.00199601	0.0213908	0.035321	1	1	1	1.01435	3.0173	0.00839107	3.0606	0.00360416
31498	3404	ML	8101816	C4orf37: chromosome 4 open reading frame 37		-2.95528	0.00199601	0.0213908	0.035321	1	1	1	1.01435	2.37907	0.00470779	2.4132	0.0194433
30702	5252	ML	7984132	USP3: ubiquitin specific peptidase 3		-2.3777	0.00199601	0.0213908	0.035321	1	1	1	1.01434	3.30983	0.0282992	3.3573	0.0198683
31477	3457	ML	8106709	ATG10: autophagy related 10		-2.9353	0.00199601	0.0213908	0.035321	1	1	1	1.01434	3.14947	0.0151573	3.19463	0.021922
33137	255	ML	8149216	LOC349196: uncharacterized LOC349196		-7.27486	0.00199601	0.0213908	0.035321	1	1	1	1.01431	2.95663	0.00725144	2.99893	0.0069888
31536	3314	ML	8178790	GPSM3: G-protein signaling modulator 3		-2.99572	0.00199601	0.0213908	0.035321	1	1	1	1.0143	3.1043	0.0216259	3.1487	0.0138318
31779	2852	ML	8009875	MYO15B: myosin XVB pseudogene		-3.2048	0.00199601	0.0213908	0.035321	1	1	1	1.01428	2.88903	0.0135212	2.9303	0.0177367
32138	2117	ML	8063761	CDH26: cadherin 26		-3.62674	0.00199601	0.0213908	0.035321	1	1	1	1.01428	2.80507	0.0188354	2.84513	0.00337244
30750	5147	ML	8056810	LOC100129312: uncharacterized LOC100129312		-2.4037	0.00199601	0.0213908	0.035321	1	1	1	1.01426	2.53107	0.00868005	2.56717	0.0245219
31282	3906	ML	8047097	GLS: glutaminase		-2.76751	0.00199601	0.0213908	0.035321	1	1	1	1.01426	3.25353	0.0228456	3.29993	0.0179269
31820	2748	ML	7903171	RWDD3: RWD domain containing 3		-3.25966	0.00199601	0.0213908	0.035321	1	1	1	1.01426	2.99733	0.0200645	3.04007	0.0106308
31594	3216	ML	8110472	ZFP2: zinc finger protein 2 homolog (mouse)		-3.03772	0.00199601	0.0213908	0.035321	1	1	1	1.01426	2.6422	0.00468081	2.67987	0.0209605
31199	4098	ML	8176480	ENST00000470885: ncrna_pseudogene:Mt_tRNA_pseudogene chromosome:GRCh37:Y:8240214:8240281:1 gene:ENSG00000241591 gene_biotype:Mt_tRNA_pseudogene transcript_biotype:Mt_tRNA_pseudogene		-2.70921	0.00199601	0.0213908	0.035321	1	1	1	1.01425	1.77953	0.00833807	1.8049	0.0139097
31391	3658	ML	7917754	BCAR3: breast cancer anti-estrogen resistance 3		-2.85256	0.00199601	0.0213908	0.035321	1	1	1	1.01425	3.0092	0.00659621	3.05207	0.0251786
32795	900	ML	7966448	TMEM116: transmembrane protein 116		-4.91504	0.00199601	0.0213908	0.035321	1	1	1	1.01422	3.27127	0.00955057	3.3178	0.01333
33072	368	ML	7952599	ENST00000410842: ncrna:misc_RNA chromosome:GRCh37:11:127275923:127276227:-1 gene:ENSG00000222774 gene_biotype:misc_RNA transcript_biotype:misc_RNA		-6.57701	0.00199601	0.0213908	0.035321	1	1	1	1.01422	2.1677	0.00336452	2.19853	0.00739008
32068	2256	ML	8155747	C9orf135: chromosome 9 open reading frame 135		-3.54257	0.00199601	0.0213908	0.035321	1	1	1	1.01422	2.85097	0.00444335	2.8915	0.0193132
31355	3729	ML	8001507	BBS2: Bardet-Biedl syndrome 2		-2.82728	0.00199601	0.0213908	0.035321	1	1	1	1.01422	3.23817	0.0256167	3.2842	0.0117932
31854	2683	ML	8170520	CNGA2: cyclic nucleotide gated channel alpha 2		-3.29792	0.00199601	0.0213908	0.035321	1	1	1	1.01421	2.6081	0.0118832	2.64517	0.0154196
32431	1579	ML	8044353	ACOXL: acyl-CoA oxidase-like		-4.06915	0.00199601	0.0213908	0.035321	1	1	1	1.0142	3.11393	0.00230072	3.15817	0.018687
31285	3902	ML	8070215	SETD4: SET domain containing 4		-2.76897	0.00199601	0.0213908	0.035321	1	1	1	1.01419	3.09227	0.0230188	3.13613	0.0149353
31744	2918	ML	8105436	MAP3K1: mitogen-activated protein kinase kinase kinase 1, E3 ubiquitin protein ligase		-3.17641	0.00199601	0.0213908	0.035321	1	1	1	1.01418	3.34813	0.0241349	3.3956	0.0093504
33144	248	ML	8028955	CYP2B7P1: cytochrome P450, family 2, subfamily B, polypeptide 7 pseudogene 1		-7.36701	0.00199601	0.0213908	0.035321	1	1	1	1.01418	2.8054	0.0074	2.84517	0.00571431
33170	207	ML	8069700	N6AMT1: N-6 adenine-specific DNA methyltransferase 1 (putative)		-7.76089	0.00199601	0.0213908	0.035321	1	1	1	1.01417	3.00203	0.00626126	3.04457	0.00713466
33135	260	ML	7956759	SRGAP1: SLIT-ROBO Rho GTPase activating protein 1		-7.23232	0.00199601	0.0213908	0.035321	1	1	1	1.01416	3.13083	0.00863153	3.17517	0.0061825
31628	3138	ML	7984380	IQCH: IQ motif containing H		-3.07624	0.00199601	0.0213908	0.035321	1	1	1	1.01414	2.7149	0.00363731	2.7533	0.0213127
31310	3846	ML	8062705	L3MBTL1: l(3)mbt-like 1 (Drosophila)		-2.79142	0.00199601	0.0213908	0.035321	1	1	1	1.01414	3.00807	0.0219477	3.0506	0.0146564
31242	3996	ML	7913787	C1orf201: chromosome 1 open reading frame 201		-2.73923	0.00199601	0.0213908	0.035321	1	1	1	1.01414	3.1335	0.0135967	3.1778	0.0244902
30863	4874	ML	7992742	7992742: unannotated transcript: chr16:2952848-2952955		-2.4746	0.00199601	0.0213908	0.035321	1	1	1	1.01414	2.0139	0.0113265	2.04237	0.0163922
31841	2710	ML	8099912	C4orf34: chromosome 4 open reading frame 34		-3.28493	0.00199601	0.0213908	0.035321	1	1	1	1.01413	3.31927	0.0205695	3.36617	0.0137267
30273	6265	ML	7993167	ATF7IP2: activating transcription factor 7 interacting protein 2		-2.14784	0.00199601	0.0213908	0.035321	1	1	1	1.01412	2.97397	0.0299535	3.01597	0.015809
32928	637	ML	7982504	PGBD4: piggyBac transposable element derived 4		-5.52673	0.00199601	0.0213908	0.035321	1	1	1	1.01411	2.92143	0.0112536	2.96267	0.00635164
31868	2660	ML	8161388	ANKRD20A3: ankyrin repeat domain 20 family, member A3		-3.30682	0.00199601	0.0213908	0.035321	1	1	1	1.0141	2.5651	0.00695054	2.60127	0.0176222
31869	2659	ML	8155397	8155397: unannotated transcript: chr9:42368303-42411863		-3.30682	0.00199601	0.0213908	0.035321	1	1	1	1.0141	2.5651	0.00695054	2.60127	0.0176222
32376	1667	ML	7908940	ATP2B4: ATPase, Ca++ transporting, plasma membrane 4		-4.0008	0.00199601	0.0213908	0.035321	1	1	1	1.0141	3.3031	0.0161929	3.34967	0.0120089
33230	125	ML	8074931	ZNF70: zinc finger protein 70		-8.73051	0.00199601	0.0213908	0.035321	1	1	1	1.0141	2.99823	0.00710657	3.0405	0.00445084
32560	1324	ML	8061247	RIN2: Ras and Rab interactor 2		-4.31428	0.00199601	0.0213908	0.035321	1	1	1	1.01407	2.9372	0.0108513	2.97853	0.0125544
33173	202	ML	7958532	UBE3B: ubiquitin protein ligase E3B		-7.79997	0.00199601	0.0213908	0.035321	1	1	1	1.01407	3.32187	0.0078015	3.3686	0.00684324
32153	2092	ML	8057689	OSGEPL1: O-sialoglycoprotein endopeptidase-like 1		-3.64535	0.00199601	0.0213908	0.035321	1	1	1	1.01405	3.13103	0.0171818	3.17503	0.0119102
33194	174	ML	8103025	ZNF827: zinc finger protein 827		-7.99361	0.00199601	0.0213908	0.035321	1	1	1	1.01405	3.2437	0.00472864	3.28927	0.00866737
33184	190	ML	7980080	ENTPD5: ectonucleoside triphosphate diphosphohydrolase 5		-7.88526	0.00199601	0.0213908	0.035321	1	1	1	1.01404	3.0797	0.0062554	3.12293	0.00714516
32870	746	ML	8142096	ATXN7L1: ataxin 7-like 1		-5.2292	0.00199601	0.0213908	0.035321	1	1	1	1.01404	3.4739	0.0155	3.52267	0.00454569
30689	5276	ML	7965587	ENST00000362636: ncrna:snRNA chromosome:GRCh37:12:96186307:96186413:-1 gene:ENSG00000199506 gene_biotype:snRNA transcript_biotype:snRNA		-2.37271	0.00199601	0.0213908	0.035321	1	1	1	1.01402	2.17793	0.0119056	2.20847	0.0188429
31597	3212	ML	7961151	KLRC4-KLRK1: KLRC4-KLRK1 readthrough		-3.03918	0.00199601	0.0213908	0.035321	1	1	1	1.01402	2.0044	0.0115572	2.0325	0.0110856
28106	11561	ML	8028744	LGALS17A: Charcot-Leyden crystal protein pseudogene		-1.39768	0.00199601	0.0213908	0.035321	1	1	1	1.01402	2.46863	0.0104481	2.50323	0.0415849
31175	4158	ML	8121312	C6orf203: chromosome 6 open reading frame 203		-2.69276	0.00199601	0.0213908	0.035321	1	1	1	1.014	2.92113	0.026301	2.96203	0.000602771
32905	677	ML	8171229	PNPLA4: patatin-like phospholipase domain containing 4		-5.41712	0.00199601	0.0213908	0.035321	1	1	1	1.01398	3.21	0.00828191	3.25487	0.0117134
29886	7234	ML	7912629	KAZN: kazrin, periplakin interacting protein		-1.96644	0.00199601	0.0213908	0.035321	1	1	1	1.01397	2.73493	0.00798394	2.77313	0.0326858
32893	701	ML	8125447	8125447: unannotated transcript: chr6:32546546-32634594		-5.36368	0.00199601	0.0213908	0.035321	1	1	1	1.01396	2.64327	0.010451	2.68017	0.00572393
33034	429	ML	8042576	NAGK: N-acetylglucosamine kinase		-6.25675	0.00199601	0.0213908	0.035321	1	1	1	1.01396	3.46343	0.00597523	3.51177	0.0119718
32558	1329	ML	7926728	MYO3A: myosin IIIA		-4.3076	0.00199601	0.0213908	0.035321	1	1	1	1.01395	2.89037	0.0149547	2.9307	0.00627455
31496	3407	ML	8097645	ENST00000410662: ncrna:misc_RNA chromosome:GRCh37:4:145956284:145956588:1 gene:ENSG00000222594 gene_biotype:misc_RNA transcript_biotype:misc_RNA		-2.95498	0.00199601	0.0213908	0.035321	1	1	1	1.01395	2.27497	0.010052	2.3067	0.0156502
31627	3142	ML	7906330	CD1D: CD1d molecule		-3.07372	0.00199601	0.0213908	0.035321	1	1	1	1.01393	2.9829	0.0146058	3.02447	0.0183113
28953	9530	ML	8101675	ABCG2: ATP-binding cassette, sub-family G (WHITE), member 2		-1.63423	0.00199601	0.0213908	0.035321	1	1	1	1.01393	2.9221	0.0428249	2.9628	0.00517397
31157	4188	ML	8162039	C9orf64: chromosome 9 open reading frame 64		-2.68636	0.00199601	0.0213908	0.035321	1	1	1	1.01392	3.07653	0.0275355	3.11937	0.00212211
30988	4570	ML	7910792	RYR2: ryanodine receptor 2 (cardiac)		-2.56896	0.00199601	0.0213908	0.035321	1	1	1	1.01391	3.06337	0.00680612	3.10597	0.0279038
31816	2755	ML	7901513	SCP2: sterol carrier protein 2		-3.25571	0.00199601	0.0213908	0.035321	1	1	1	1.01389	3.11237	0.0211647	3.1556	0.00900389
32117	2164	ML	8090395	TXNRD3: thioredoxin reductase 3		-3.60347	0.00199601	0.0213908	0.035321	1	1	1	1.01388	3.00453	0.0144905	3.04623	0.0138482
33217	144	ML	8113761	ZNF608: zinc finger protein 608		-8.47395	0.00199601	0.0213908	0.035321	1	1	1	1.01387	3.31163	0.00662143	3.35757	0.00665607
30153	6585	ML	7970563	RPS7P10: ribosomal protein S7 pseudogene 10		-2.07936	0.00199601	0.0213908	0.035321	1	1	1	1.01387	2.401	0.0232742	2.4343	0.0150901
32272	1861	ML	8003233	MTHFSD: methenyltetrahydrofolate synthetase domain containing		-3.82299	0.00199601	0.0213908	0.035321	1	1	1	1.01383	2.99433	0.00270062	3.03573	0.0185613
33133	262	ML	8149167	8149167: unannotated transcript: chr8:7149728-7150010		-7.21776	0.00199601	0.0213908	0.035321	1	1	1	1.01382	2.95683	0.00720093	2.9977	0.00665733
33134	263	ML	8149165	8149165: unannotated transcript: chr8:7142106-7142388		-7.21776	0.00199601	0.0213908	0.035321	1	1	1	1.01382	2.95683	0.00720093	2.9977	0.00665733
33201	163	ML	7915682	ZSWIM5: zinc finger, SWIM-type containing 5		-8.1828	0.00199601	0.0213908	0.035321	1	1	1	1.01376	3.1013	0.00227156	3.14397	0.0087409
32321	1765	ML	8099364	ZNF518B: zinc finger protein 518B		-3.90483	0.00199601	0.0213908	0.035321	1	1	1	1.01374	3.31007	0.00973156	3.35553	0.0176642
29890	7226	ML	8144582	RN5S252: RNA, 5S ribosomal 252		-1.9676	0.00199601	0.0213908	0.035321	1	1	1	1.01373	2.1773	0.00842852	2.2072	0.0249345
29393	8491	ML	8123744	F13A1: coagulation factor XIII, A1 polypeptide		-1.77287	0.00199601	0.0213908	0.035321	1	1	1	1.01371	2.81397	0.0348044	2.85253	0.0144341
29895	7211	ML	8084788	CLDN16: claudin 16		-1.96987	0.00199601	0.0213908	0.035321	1	1	1	1.01368	2.57763	0.0181555	2.6129	0.0251382
33031	436	ML	8076749	C22orf40: chromosome 22 open reading frame 40		-6.21884	0.00199601	0.0213908	0.035321	1	1	1	1.01368	3.10887	0.00999016	3.1514	0.00636632
33157	227	ML	8152215	KLF10: Kruppel-like factor 10		-7.53285	0.00199601	0.0213908	0.035321	1	1	1	1.01367	3.16057	0.00912159	3.20377	0.00393234
30615	5455	ML	8017827	ENST00000364677: ncrna:misc_RNA chromosome:GRCh37:17:65404890:65404997:-1 gene:ENSG00000201547 gene_biotype:misc_RNA transcript_biotype:misc_RNA		-2.32862	0.00199601	0.0213908	0.035321	1	1	1	1.01367	2.28047	0.00610765	2.31163	0.022363
30393	5979	ML	8012908	TEKT3: tektin 3		-2.21027	0.00199601	0.0213908	0.035321	1	1	1	1.01366	2.70207	0.0188585	2.73897	0.0219204
29314	8675	ML	8096938	LARP7: La ribonucleoprotein domain family, member 7		-1.74136	0.00199601	0.0213908	0.035321	1	1	1	1.01365	3.00083	0.00818189	3.0418	0.0399178
31490	3420	ML	7976967	ZNF839: zinc finger protein 839		-2.95018	0.00199601	0.0213908	0.035321	1	1	1	1.01364	2.98217	0.0184072	3.02283	0.0152057
33096	329	ML	8108847	RNF14: ring finger protein 14		-6.76403	0.00199601	0.0213908	0.035321	1	1	1	1.01364	3.37087	0.0117091	3.41683	0.00120139
30622	5439	ML	8008802	GDPD1: glycerophosphodiester phosphodiesterase domain containing 1		-2.33203	0.00199601	0.0213908	0.035321	1	1	1	1.01362	2.9403	0.0205278	2.98033	0.0215105
31239	4000	ML	8081219	ST3GAL6: ST3 beta-galactoside alpha-2,3-sialyltransferase 6		-2.7384	0.00199601	0.0213908	0.035321	1	1	1	1.01361	3.1473	0.0222205	3.19013	0.0154998
31646	3108	ML	8171921	DMD: dystrophin		-3.09201	0.00199601	0.0213908	0.035321	1	1	1	1.0136	2.73247	0.0181704	2.76963	0.0101633
32329	1747	ML	8071058	ACTR3BP2: ARP3 actin-related protein 3 homolog B (yeast) pseudogene 2		-3.92608	0.00199601	0.0213908	0.035321	1	1	1	1.01358	1.94883	0.0108076	1.9753	0.00441928
33160	222	ML	8108757	PCDHGC5: protocadherin gamma subfamily C, 5		-7.60633	0.00199601	0.0213908	0.035321	1	1	1	1.01358	2.93097	0.00759759	2.97077	0.00494099
31113	4286	ML	7986639	TCONS_l2_00009483-XLOC_l2_004840: linc-POTEB-7 chr15:-:22472918-22473353		-2.6535	0.00199601	0.0213908	0.035321	1	1	1	1.01357	2.78657	0.0112527	2.82437	0.0219582
31930	2546	ML	7963786	ITGA5: integrin, alpha 5 (fibronectin receptor, alpha polypeptide)		-3.37384	0.00199601	0.0213908	0.035321	1	1	1	1.01356	3.29283	0.00800333	3.3375	0.0214888
32710	1064	ML	7947947	AGBL2: ATP/GTP binding protein-like 2		-4.66422	0.00199601	0.0213908	0.035321	1	1	1	1.01355	2.78997	0.00805129	2.82777	0.0114984
30670	5316	ML	8162586	SLC35D2: solute carrier family 35, member D2		-2.36182	0.00199601	0.0213908	0.035321	1	1	1	1.01354	3.18583	0.0218269	3.22897	0.0228948
29576	7970	ML	7914938	ENST00000364578: ncrna:snoRNA chromosome:GRCh37:1:36884051:36884179:-1 gene:ENSG00000201448 gene_biotype:snoRNA transcript_biotype:snoRNA		-1.84593	0.00199601	0.0213908	0.035321	1	1	1	1.01353	2.55163	0.0301331	2.58617	0.011914
31530	3323	ML	8014264	PEX12: peroxisomal biogenesis factor 12		-2.99143	0.00199601	0.0213908	0.035321	1	1	1	1.01353	2.96933	0.00366924	3.0095	0.0229654
32658	1147	ML	8038981	ZNF611: zinc finger protein 611		-4.54209	0.00199601	0.0213908	0.035321	1	1	1	1.01352	3.139	0.00858429	3.18143	0.0137165
32259	1881	ML	8079869	RBM5: RNA binding motif protein 5		-3.80733	0.00199601	0.0213908	0.035321	1	1	1	1.01351	3.40327	0.0146603	3.44923	0.0149119
32936	621	ML	8076137	SUN2: Sad1 and UNC84 domain containing 2		-5.56323	0.00199601	0.0213908	0.035321	1	1	1	1.01349	3.08447	0.0109792	3.12607	0.00687047
32161	2080	ML	8038967	ZNF83: zinc finger protein 83		-3.65347	0.00199601	0.0213908	0.035321	1	1	1	1.01347	3.13463	0.0117934	3.17687	0.0161803
28796	9913	ML	8152250	ENST00000478682: ncrna_pseudogene:scRNA_pseudogene chromosome:GRCh37:8:104106755:104106842:-1 gene:ENSG00000242621 gene_biotype:scRNA_pseudogene transcript_biotype:scRNA_pseudogene		-1.58814	0.00199601	0.0213908	0.035321	1	1	1	1.01345	1.71497	0.00991581	1.73803	0.0231202
32239	1914	ML	7894697	7894697: unannotated transcript: ---:-------		-3.77646	0.00199601	0.0213908	0.035321	1	1	1	1.01345	2.97393	0.0127021	3.01393	0.0132372
29233	8859	ML	8113699	ENST00000458753: ncrna:snoRNA chromosome:GRCh37:5:118404992:118405095:-1 gene:ENSG00000239011 gene_biotype:snoRNA transcript_biotype:snoRNA		-1.7171	0.00199601	0.0213908	0.035321	1	1	1	1.01343	2.77793	0.036731	2.81523	0.0081525
33167	212	ML	8150881	PLAG1: pleiomorphic adenoma gene 1		-7.72262	0.00199601	0.0213908	0.035321	1	1	1	1.01342	3.1797	0.00216333	3.22237	0.00932166
31576	3250	ML	7986293	MCTP2: multiple C2 domains, transmembrane 2		-3.02334	0.00199601	0.0213908	0.035321	1	1	1	1.01341	2.9818	0.0131259	3.0218	0.018784
32706	1072	ML	8037621	EML2: echinoderm microtubule associated protein like 2		-4.65467	0.00199601	0.0213908	0.035321	1	1	1	1.01341	3.04407	0.0127908	3.0849	0.00820183
29943	7100	ML	7957452	ALX1: ALX homeobox 1		-1.98775	0.00199601	0.0213908	0.035321	1	1	1	1.0134	2.70657	0.0314166	2.74283	0.00341223
33003	491	ML	7951133	MAML2: mastermind-like 2 (Drosophila)		-6.02321	0.00199601	0.0213908	0.035321	1	1	1	1.01337	3.113	0.010714	3.15463	0.0053426
31192	4112	ML	7925130	TARBP1: TAR (HIV-1) RNA binding protein 1		-2.70509	0.00199601	0.0213908	0.035321	1	1	1	1.01337	3.2005	0.0136704	3.2433	0.0237514
31345	3749	ML	7917954	FRRS1: ferric-chelate reductase 1		-2.81889	0.00199601	0.0213908	0.035321	1	1	1	1.01337	3.1487	0.00966592	3.1908	0.0239944
33042	417	ML	8076547	TTLL1: tubulin tyrosine ligase-like family, member 1		-6.31079	0.00199601	0.0213908	0.035321	1	1	1	1.01336	3.2	0.0091033	3.24277	0.00740968
32528	1392	ML	7962058	TMTC1: transmembrane and tetratricopeptide repeat containing 1		-4.24571	0.00199601	0.0213908	0.035321	1	1	1	1.01336	3.1703	0.0141746	3.21267	0.00988956
31556	3282	ML	8150584	TRNAL41P: transfer RNA leucine 41 (anticodon UAA) pseudogene		-3.01028	0.00199601	0.0213908	0.035321	1	1	1	1.01336	1.97563	0.00726108	2.00203	0.0133422
31581	3244	ML	8103494	NPY1R: neuropeptide Y receptor Y1		-3.02465	0.00199601	0.0213908	0.035321	1	1	1	1.01336	3.06917	0.0156721	3.11017	0.0174821
31070	4386	ML	8063156	CD40: CD40 molecule, TNF receptor superfamily member 5		-2.62394	0.00199601	0.0213908	0.035321	1	1	1	1.01335	2.988	0.0246514	3.0279	0.00927308
31230	4017	ML	8034320	ZNF433: zinc finger protein 433		-2.73098	0.00199601	0.0213908	0.035321	1	1	1	1.01335	2.71863	0.013922	2.75493	0.0183358
33164	216	ML	7948375	OR5BB1P: olfactory receptor, family 5, subfamily BB, member 1 pseudogene		-7.70922	0.00199601	0.0213908	0.035321	1	1	1	1.01335	2.31473	0.00550848	2.34563	0.00422532
32830	823	ML	8168976	GPRASP2: G protein-coupled receptor associated sorting protein 2		-5.07404	0.00199601	0.0213908	0.035321	1	1	1	1.01334	3.0595	0.00886623	3.1003	0.0107406
30967	4619	ML	8043621	ARID5A: AT rich interactive domain 5A (MRF1-like)		-2.55512	0.00199601	0.0213908	0.035321	1	1	1	1.01333	3.0101	0.0241037	3.05023	0.0126152
31177	4154	ML	8150186	RNF122: ring finger protein 122		-2.694	0.00199601	0.0213908	0.035321	1	1	1	1.01332	3.2873	0.00961093	3.3311	0.0264694
30955	4649	ML	8038989	ZNF600: zinc finger protein 600		-2.54713	0.00199601	0.0213908	0.035321	1	1	1	1.01331	2.94297	0.0186765	2.98213	0.0189875
29797	7409	ML	8078395	ENST00000459453: ncrna:snoRNA chromosome:GRCh37:3:32214148:32214252:1 gene:ENSG00000238646 gene_biotype:snoRNA transcript_biotype:snoRNA		-1.93431	0.00199601	0.0213908	0.035321	1	1	1	1.01331	2.25693	0.0149165	2.28697	0.0223768
32827	826	ML	7911017	SDCCAG8: serologically defined colon cancer antigen 8		-5.06602	0.00199601	0.0213908	0.035321	1	1	1	1.0133	2.97693	0.0102105	3.01653	0.00889119
32513	1414	ML	7932637	ANKRD26: ankyrin repeat domain 26		-4.22588	0.00199601	0.0213908	0.035321	1	1	1	1.0133	3.00853	0.00978485	3.04853	0.0131546
31390	3662	ML	7896251	7896251: unannotated transcript: ---:-------		-2.85133	0.00199601	0.0213908	0.035321	1	1	1	1.01329	2.90713	0.00951332	2.94577	0.0214533
30232	6365	ML	8147661	SPAG1: sperm associated antigen 1		-2.12519	0.00199601	0.0213908	0.035321	1	1	1	1.01328	2.79197	0.0180378	2.82903	0.0242335
31084	4349	ML	7923131	DENND1B: DENN/MADD domain containing 1B		-2.63318	0.00199601	0.0213908	0.035321	1	1	1	1.01327	2.9842	0.0220565	3.0238	0.0138568
30803	5012	ML	8170476	GPR50: G protein-coupled receptor 50		-2.43668	0.00199601	0.0213908	0.035321	1	1	1	1.01324	3.07613	0.0102041	3.11687	0.0270966
30909	4754	ML	7971191	SUGT1P3: suppressor of G2 allele of SKP1 (S. cerevisiae) pseudogene 3		-2.51013	0.00199601	0.0213908	0.035321	1	1	1	1.01324	2.656	0.0152588	2.69117	0.0188681
31600	3207	ML	8174149	NXF2B: nuclear RNA export factor 2B		-3.04069	0.00199601	0.0213908	0.035321	1	1	1	1.01324	2.59883	0.00869042	2.63323	0.0175626
31994	2399	ML	7989849	DENND4A: DENN/MADD domain containing 4A		-3.45021	0.00199601	0.0213908	0.035321	1	1	1	1.01323	3.1261	0.0182	3.16747	0.0100007
30036	6877	ML	8065421	CST5: cystatin D		-2.0226	0.00199601	0.0213908	0.035321	1	1	1	1.01323	2.834	0.0106925	2.8715	0.0302807
33213	150	ML	8167163	CXorf24: chromosome X open reading frame 24		-8.41194	0.00199601	0.0213908	0.035321	1	1	1	1.01323	2.908	0.0032078	2.94647	0.00724178
32244	1907	ML	8116780	DSP: desmoplakin		-3.78455	0.00199601	0.0213908	0.035321	1	1	1	1.01321	3.35973	0.00920072	3.4041	0.0181008
32348	1710	ML	7998381	LMF1: lipase maturation factor 1		-3.96158	0.00199601	0.0213908	0.035321	1	1	1	1.0132	3.22567	0.0169615	3.26823	0.0076592
32714	1054	ML	8006715	TADA2A: transcriptional adaptor 2A		-4.66926	0.00199601	0.0213908	0.035321	1	1	1	1.01319	3.10693	0.0107872	3.1479	0.0107037
32410	1623	ML	8056215	AK093576: Homo sapiens cDNA FLJ36257 fis, clone THYMU2002376.		-4.03492	0.00199601	0.0213908	0.035321	1	1	1	1.01317	2.83003	0.0156308	2.8673	0.00340441
31928	2551	ML	8155574	ANKRD20A3: ankyrin repeat domain 20 family, member A3		-3.37292	0.00199601	0.0213908	0.035321	1	1	1	1.01316	2.5682	0.00461844	2.602	0.0167311
32238	1915	ML	7943892	NCAM1: neural cell adhesion molecule 1		-3.77646	0.00199601	0.0213908	0.035321	1	1	1	1.01316	3.02987	0.0169193	3.06973	0.00693277
32049	2291	ML	8008388	SPATA20: spermatogenesis associated 20		-3.51506	0.00199601	0.0213908	0.035321	1	1	1	1.01316	3.18743	0.0144618	3.22937	0.0147582
32125	2149	ML	7960383	PARP11: poly (ADP-ribose) polymerase family, member 11		-3.60925	0.00199601	0.0213908	0.035321	1	1	1	1.01315	2.96423	0.0147314	3.0032	0.0115182
32162	2078	ML	7968389	RXFP2: relaxin/insulin-like family peptide receptor 2		-3.65362	0.00199601	0.0213908	0.035321	1	1	1	1.01314	2.02687	0.00930931	2.0535	0.00852936
32354	1702	ML	7990211	HEXA: hexosaminidase A (alpha polypeptide)		-3.97298	0.00199601	0.0213908	0.035321	1	1	1	1.01314	3.15593	0.00973875	3.1974	0.0152302
31997	2395	ML	8067248	PPP4R1L: protein phosphatase 4, regulatory subunit 1-like		-3.45217	0.00199601	0.0213908	0.035321	1	1	1	1.01314	2.87203	0.0185023	2.90977	0.0040104
33252	88	ML	8135015	MUC3B: mucin 3B, cell surface associated		-9.4368	0.00199601	0.0213908	0.035321	1	1	1	1.01312	3.1311	0.00432782	3.17217	0.00617117
32131	2132	ML	8008074	CDK5RAP3: CDK5 regulatory subunit associated protein 3		-3.6191	0.00199601	0.0213908	0.035321	1	1	1	1.0131	3.11333	0.01735	3.15413	0.00895842
31121	4266	ML	8120579	C6orf57: chromosome 6 open reading frame 57		-2.65847	0.00199601	0.0213908	0.035321	1	1	1	1.01309	2.98283	0.0123488	3.02187	0.0222316
32313	1774	ML	8005638	ALDH3A2: aldehyde dehydrogenase 3 family, member A2		-3.89995	0.00199601	0.0213908	0.035321	1	1	1	1.01309	3.34983	0.0110024	3.39367	0.01606
31907	2596	ML	8075164	CHEK2: checkpoint kinase 2		-3.34	0.00199601	0.0213908	0.035321	1	1	1	1.01308	3.3115	0.018966	3.3548	0.0120204
30624	5433	ML	8093665	GRK4: G protein-coupled receptor kinase 4		-2.33277	0.00199601	0.0213908	0.035321	1	1	1	1.01307	2.7179	0.00632218	2.75343	0.0256143
32083	2233	ML	7959834	GLT1D1: glycosyltransferase 1 domain containing 1		-3.55221	0.00199601	0.0213908	0.035321	1	1	1	1.01307	3.07937	0.0121187	3.1196	0.0154269
30772	5085	ML	8066161	C20orf132: chromosome 20 open reading frame 132		-2.41773	0.00199601	0.0213908	0.035321	1	1	1	1.01304	2.6307	0.00814678	2.665	0.0231825
32277	1854	ML	8169035	TCEAL4: transcription elongation factor A (SII)-like 4		-3.83544	0.00199601	0.0213908	0.035321	1	1	1	1.01303	3.06123	0.013706	3.10113	0.0116967
32267	1869	ML	8012464	LOC100128288: uncharacterized LOC100128288		-3.81305	0.00199601	0.0213908	0.035321	1	1	1	1.01303	2.96677	0.0060542	3.00543	0.0164877
31874	2650	ML	8002618	ZNF821: zinc finger protein 821		-3.312	0.00199601	0.0213908	0.035321	1	1	1	1.01303	2.9046	0.0185712	2.94243	0.00682447
32924	643	ML	7978066	AP1G2: adaptor-related protein complex 1, gamma 2 subunit		-5.51046	0.00199601	0.0213908	0.035321	1	1	1	1.01302	3.2692	0.0128643	3.31177	0.00367741
32995	507	ML	7984019	TLN2: talin 2		-5.96837	0.00199601	0.0213908	0.035321	1	1	1	1.01301	3.17657	0.0103732	3.2179	0.00602329
31736	2933	ML	7976084	SPATA7: spermatogenesis associated 7		-3.16671	0.00199601	0.0213908	0.035321	1	1	1	1.013	2.95743	0.0188322	2.99587	0.00934041
32721	1034	ML	8036420	ZFP30: zinc finger protein 30 homolog (mouse)		-4.69881	0.00199601	0.0213908	0.035321	1	1	1	1.01299	2.90953	0.0116895	2.94733	0.0075831
31416	3585	ML	7897509	NMNAT1: nicotinamide nucleotide adenylyltransferase 1		-2.8854	0.00199601	0.0213908	0.035321	1	1	1	1.01297	2.70097	0.0163102	2.736	0.0132752
29549	8049	ML	7979414	ENST00000481399: ncrna_pseudogene:scRNA_pseudogene chromosome:GRCh37:14:58827387:58827464:-1 gene:ENSG00000241940 gene_biotype:scRNA_pseudogene transcript_biotype:scRNA_pseudogene		-1.83478	0.00199601	0.0213908	0.035321	1	1	1	1.01296	1.93427	0.00110604	1.95933	0.0236373
31274	3923	ML	7937900	STIM1: stromal interaction molecule 1		-2.76386	0.00199601	0.0213908	0.035321	1	1	1	1.01291	3.15447	0.00938367	3.1952	0.0237394
31354	3731	ML	8018209	NAT9: N-acetyltransferase 9 (GCN5-related, putative)		-2.8264	0.00199601	0.0213908	0.035321	1	1	1	1.01285	3.14057	0.023567	3.18093	0.0075182
32787	911	ML	7977955	PPP1R3E: protein phosphatase 1, regulatory subunit 3E		-4.89231	0.00199601	0.0213908	0.035321	1	1	1	1.01285	2.96993	0.0081347	3.0081	0.0107893
31853	2684	ML	8065719	PXMP4: peroxisomal membrane protein 4, 24kDa		-3.29743	0.00199601	0.0213908	0.035321	1	1	1	1.01284	3.00573	0.00430039	3.04433	0.0198142
30996	4553	ML	7944869	SPA17: sperm autoantigenic protein 17		-2.57295	0.00199601	0.0213908	0.035321	1	1	1	1.01283	3.1063	0.00720208	3.14617	0.0258529
31460	3487	ML	8059158	GLB1L: galactosidase, beta 1-like		-2.9182	0.00199601	0.0213908	0.035321	1	1	1	1.01281	3.00027	0.0184925	3.0387	0.0133563
32220	1950	ML	8065392	ENST00000363338: ncrna:misc_RNA chromosome:GRCh37:20:23438221:23438322:-1 gene:ENSG00000200208 gene_biotype:misc_RNA transcript_biotype:misc_RNA		-3.75516	0.00199601	0.0213908	0.035321	1	1	1	1.0128	1.67407	0.00736569	1.6955	0.00659394
31443	3522	ML	7923141	DENND1B: DENN/MADD domain containing 1B		-2.90708	0.00199601	0.0213908	0.035321	1	1	1	1.01279	2.963	0.0168057	3.0009	0.0150821
29592	7914	ML	7938788	LDHC: lactate dehydrogenase C		-1.85584	0.00199601	0.0213908	0.035321	1	1	1	1.01279	2.45297	0.0287698	2.48433	0.00541233
31619	3164	ML	8104321	ADAMTS16: ADAM metallopeptidase with thrombospondin type 1 motif, 16		-3.06205	0.00199601	0.0213908	0.035321	1	1	1	1.01278	3.0909	0.00976166	3.1304	0.020098
32171	2063	ML	8136187	CPA2: carboxypeptidase A2 (pancreatic)		-3.66449	0.00199601	0.0213908	0.035321	1	1	1	1.01278	2.37117	0.0140643	2.40147	0.00270247
30039	6874	ML	8084794	IL1RAP: interleukin 1 receptor accessory protein		-2.02323	0.00199601	0.0213908	0.035321	1	1	1	1.01274	2.77187	0.0298607	2.80717	0.00464363
28448	10750	ML	8026587	NWD1: NACHT and WD repeat domain containing 1		-1.48547	0.00199601	0.0213908	0.035321	1	1	1	1.01273	2.6469	0.0124736	2.6806	0.0372618
28617	10339	ML	8052016	8052016: unannotated transcript: chr2:47586599-47586916		-1.53476	0.00199601	0.0213908	0.035321	1	1	1	1.01273	2.7501	0.0145338	2.7851	0.0367282
32249	1895	ML	7947138	FANCF: Fanconi anemia, complementation group F		-3.79836	0.00199601	0.0213908	0.035321	1	1	1	1.01272	3.12263	0.0125385	3.16237	0.0130791
32370	1679	ML	8051322	XDH: xanthine dehydrogenase		-3.99547	0.00199601	0.0213908	0.035321	1	1	1	1.01272	2.88083	0.015512	2.91747	0.00340196
30950	4661	ML	7974341	GNG2: guanine nucleotide binding protein (G protein), gamma 2		-2.5428	0.00199601	0.0213908	0.035321	1	1	1	1.01271	2.96623	0.0144597	3.00393	0.0212218
31761	2886	ML	7912496	MTHFR: methylenetetrahydrofolate reductase (NAD(P)H)		-3.19047	0.00199601	0.0213908	0.035321	1	1	1	1.01271	3.11343	0.0208447	3.153	0.00518556
32950	594	ML	8144492	LOC349196: uncharacterized LOC349196		-5.65025	0.00199601	0.0213908	0.035321	1	1	1	1.01269	2.9623	0.00955196	2.9999	0.00645058
32951	593	ML	8144490	LOC349196: uncharacterized LOC349196		-5.65025	0.00199601	0.0213908	0.035321	1	1	1	1.01269	2.9623	0.00955196	2.9999	0.00645058
32952	596	ML	8144416	LOC349196: uncharacterized LOC349196		-5.65025	0.00199601	0.0213908	0.035321	1	1	1	1.01269	2.9623	0.00955196	2.9999	0.00645058
32953	595	ML	8144418	LOC349196: uncharacterized LOC349196		-5.65025	0.00199601	0.0213908	0.035321	1	1	1	1.01269	2.9623	0.00955196	2.9999	0.00645058
31369	3703	ML	7966234	TRPV4: transient receptor potential cation channel, subfamily V, member 4		-2.83778	0.00199601	0.0213908	0.035321	1	1	1	1.01269	3.07063	0.0155249	3.1096	0.0180175
32098	2208	ML	8162744	CORO2A: coronin, actin binding protein, 2A		-3.56858	0.00199601	0.0213908	0.035321	1	1	1	1.01268	3.29907	0.0176424	3.3409	0.0100504
32228	1933	ML	7990054	UACA: uveal autoantigen with coiled-coil domains and ankyrin repeats		-3.76498	0.00199601	0.0213908	0.035321	1	1	1	1.01268	3.0529	0.0144212	3.0916	0.0104403
30768	5097	ML	7911718	LOC100129534: small nuclear ribonucleoprotein polypeptide N pseudogene		-2.41597	0.00199601	0.0213908	0.035321	1	1	1	1.01267	2.96613	0.0252488	3.0037	0.0093723
32052	2287	ML	7987279	GOLGA8A: golgin A8 family, member A		-3.51686	0.00199601	0.0213908	0.035321	1	1	1	1.01266	3.26377	0.0183129	3.3051	0.00888988
33079	358	ML	8149210	LOC349196: uncharacterized LOC349196		-6.62261	0.00199601	0.0213908	0.035321	1	1	1	1.01265	2.95727	0.00505008	2.99467	0.00837695
33080	359	ML	8149161	8149161: unannotated transcript: chr8:7134407-7134841		-6.62261	0.00199601	0.0213908	0.035321	1	1	1	1.01265	2.95727	0.00505008	2.99467	0.00837695
29386	8503	ML	8141140	DLX5: distal-less homeobox 5		-1.7707	0.00199601	0.0213908	0.035321	1	1	1	1.01263	2.7454	0.014701	2.78007	0.0305575
32349	1709	ML	8143268	ENST00000362776: ncrna:snRNA chromosome:GRCh37:7:138561105:138561211:-1 gene:ENSG00000199646 gene_biotype:snRNA transcript_biotype:snRNA		-3.96316	0.00199601	0.0213908	0.035321	1	1	1	1.01262	2.17163	0.0101756	2.19903	0.00631295
32248	1901	ML	7964360	STAT6: signal transducer and activator of transcription 6, interleukin-4 induced		-3.79101	0.00199601	0.0213908	0.035321	1	1	1	1.01262	3.24187	0.0117925	3.28277	0.0144956
29909	7181	ML	7903203	SNX7: sorting nexin 7		-1.97482	0.00199601	0.0213908	0.035321	1	1	1	1.01261	3.03403	0.0310358	3.0723	0.0127754
27783	12345	ML	7972650	FGF14: fibroblast growth factor 14		-1.32034	0.00199601	0.0213908	0.035321	1	1	1	1.01261	2.55333	0.0394392	2.58553	0.0151266
32010	2368	ML	8118556	LOC100509457: HLA class II histocompatibility antigen, DQ alpha 1 chain-like		-3.46879	0.00199601	0.0213908	0.035321	1	1	1	1.01261	2.67767	0.0103852	2.71143	0.0132824
31266	3933	ML	8169665	AKAP14: A kinase (PRKA) anchor protein 14		-2.76109	0.00199601	0.0213908	0.035321	1	1	1	1.01259	2.1519	0.0102235	2.179	0.0135823
31817	2753	ML	8082795	ENST00000516832: ncrna:snRNA chromosome:GRCh37:3:133383779:133383878:1 gene:ENSG00000252641 gene_biotype:snRNA transcript_biotype:snRNA		-3.25817	0.00199601	0.0213908	0.035321	1	1	1	1.01259	2.0492	0.0114013	2.075	0.00762365
31291	3887	ML	8151572	SNX16: sorting nexin 16		-2.77533	0.00199601	0.0213908	0.035321	1	1	1	1.01259	3.14643	0.014518	3.18603	0.0200001
32967	566	ML	8070141	CRYZL1: crystallin, zeta (quinone reductase)-like 1		-5.75831	0.00199601	0.0213908	0.035321	1	1	1	1.01258	3.0558	0.0068	3.09423	0.00934897
33172	205	ML	8104693	PDZD2: PDZ domain containing 2		-7.79109	0.00199601	0.0213908	0.035321	1	1	1	1.01257	3.09547	0.00636344	3.13437	0.00585605
30476	5780	ML	7978538	ARHGAP5-AS1: ARHGAP5 antisense RNA 1 (non-protein coding)		-2.25195	0.00199601	0.0213908	0.035321	1	1	1	1.01256	2.82887	0.0154872	2.8644	0.0225182
31456	3498	ML	8054192	MITD1: MIT, microtubule interacting and transport, domain containing 1		-2.91321	0.00199601	0.0213908	0.035321	1	1	1	1.01255	2.8914	0.0127577	2.9277	0.0174078
30666	5324	ML	8124689	HCG4: HLA complex group 4 (non-protein coding)		-2.36022	0.00199601	0.0213908	0.035321	1	1	1	1.01253	2.95243	0.0148716	2.98943	0.0227177
31248	3976	ML	7921702	ITLN2: intelectin 2		-2.74596	0.00199601	0.0213908	0.035321	1	1	1	1.01253	2.9238	0.0213801	2.96043	0.00876489
30278	6249	ML	8174228	TCEAL8: transcription elongation factor A (SII)-like 8		-2.15094	0.00199601	0.0213908	0.035321	1	1	1	1.01252	3.12227	0.027497	3.16137	0.0153376
33038	422	ML	8022996	EPG5: ectopic P-granules autophagy protein 5 homolog (C. elegans)		-6.2869	0.00199601	0.0213908	0.035321	1	1	1	1.01252	3.1835	0.0100851	3.22337	0.0043501
32919	655	ML	7915955	SPATA6: spermatogenesis associated 6		-5.49117	0.00199601	0.0213908	0.035321	1	1	1	1.01252	3.17627	0.00620672	3.21603	0.0109002
32868	753	ML	8006229	RNF135: ring finger protein 135		-5.21358	0.00199601	0.0213908	0.035321	1	1	1	1.01252	3.15017	0.0127555	3.1896	0.00298664
29855	7297	ML	8091342	ZIC4: Zic family member 4		-1.95486	0.00199601	0.0213908	0.035321	1	1	1	1.01251	2.64493	0.0192191	2.67803	0.0221523
30511	5685	ML	8168900	NXF2B: nuclear RNA export factor 2B		-2.27316	0.00199601	0.0213908	0.035321	1	1	1	1.01251	2.5624	0.00944299	2.59447	0.0225349
30345	6077	ML	7965573	NTN4: netrin 4		-2.1932	0.00199601	0.0213908	0.035321	1	1	1	1.01251	2.81487	0.0225105	2.85007	0.0163108
30995	4555	ML	7945950	ENST00000308739: cdna:known chromosome:GRCh37:11:3913623:3914120:-1 gene:ENSG00000230593 gene_biotype:pseudogene transcript_biotype:retrotransposed		-2.57207	0.00199601	0.0213908	0.035321	1	1	1	1.0125	2.6902	0.0212191	2.72383	0.00791981
28907	9635	ML	7975876	ESRRB: estrogen-related receptor beta		-1.62127	0.00199601	0.0213908	0.035321	1	1	1	1.0125	2.7369	0.00651997	2.7711	0.0359504
32674	1123	ML	7988286	SPG11: spastic paraplegia 11 (autosomal recessive)		-4.58296	0.00199601	0.0213908	0.035321	1	1	1	1.01249	3.29433	0.0131059	3.33547	0.00836082
32257	1883	ML	7931556	VENTX: VENT homeobox		-3.80613	0.00199601	0.0213908	0.035321	1	1	1	1.01248	3.08753	0.0166506	3.12607	0.00549939
32845	796	ML	8149220	LOC349196: uncharacterized LOC349196		-5.1202	0.00199601	0.0213908	0.035321	1	1	1	1.01246	2.9642	0.00941701	3.00113	0.00821056
32846	797	ML	8149218	LOC349196: uncharacterized LOC349196		-5.1202	0.00199601	0.0213908	0.035321	1	1	1	1.01246	2.9642	0.00941701	3.00113	0.00821056
32847	799	ML	8149224	LOC349196: uncharacterized LOC349196		-5.1202	0.00199601	0.0213908	0.035321	1	1	1	1.01246	2.9642	0.00941701	3.00113	0.00821056
32848	798	ML	8149226	LOC349196: uncharacterized LOC349196		-5.1202	0.00199601	0.0213908	0.035321	1	1	1	1.01246	2.9642	0.00941701	3.00113	0.00821056
32849	800	ML	8149222	LOC349196: uncharacterized LOC349196		-5.1202	0.00199601	0.0213908	0.035321	1	1	1	1.01246	2.9642	0.00941701	3.00113	0.00821056
32637	1187	ML	8153776	VPS28: vacuolar protein sorting 28 homolog (S. cerevisiae)		-4.48502	0.00199601	0.0213908	0.035321	1	1	1	1.01246	3.22173	0.00401539	3.26187	0.0149697
32053	2285	ML	7909967	CAPN2: calpain 2, (m/II) large subunit		-3.51756	0.00199601	0.0213908	0.035321	1	1	1	1.01245	3.20583	0.019034	3.24573	0.00486861
31952	2494	ML	8119109	C6orf89: chromosome 6 open reading frame 89		-3.39759	0.00199601	0.0213908	0.035321	1	1	1	1.01244	3.10663	0.0110192	3.14527	0.0163237
30600	5490	ML	7957665	ELK3: ELK3, ETS-domain protein (SRF accessory protein 2)		-2.32169	0.00199601	0.0213908	0.035321	1	1	1	1.01242	3.16617	0.022723	3.2055	0.0185669
32427	1588	ML	7986092	FURIN: furin (paired basic amino acid cleaving enzyme)		-4.06299	0.00199601	0.0213908	0.035321	1	1	1	1.01242	3.18083	0.00722311	3.22033	0.015211
33047	409	ML	8013622	SGK494: uncharacterized serine/threonine-protein kinase SgK494		-6.34109	0.00199601	0.0213908	0.035321	1	1	1	1.01242	3.13587	0.00640495	3.1748	0.00848941
29072	9231	ML	8064904	FERMT1: fermitin family member 1		-1.67095	0.00199601	0.0213908	0.035321	1	1	1	1.01241	3.18027	0.0407741	3.21973	0.00332916
32089	2223	ML	7987248	GOLGA8A: golgin A8 family, member A		-3.55918	0.00199601	0.0213908	0.035321	1	1	1	1.01241	3.26673	0.017043	3.30727	0.00993093
31625	3144	ML	8052872	TGFA: transforming growth factor, alpha		-3.0719	0.00199601	0.0213908	0.035321	1	1	1	1.01237	2.91733	0.0137588	2.95343	0.0150001
31660	3083	ML	7935903	NPM3: nucleophosmin/nucleoplasmin 3		-3.10267	0.00199601	0.0213908	0.035321	1	1	1	1.01237	3.36357	0.0206081	3.40517	0.0107058
32188	2019	ML	8100478	AASDH: aminoadipate-semialdehyde dehydrogenase		-3.70106	0.00199601	0.0213908	0.035321	1	1	1	1.01236	3.2092	0.0135244	3.24887	0.0127159
32997	502	ML	7983924	ENST00000498421: ncrna_pseudogene:Mt_tRNA_pseudogene chromosome:GRCh37:15:58443165:58443231:1 gene:ENSG00000240903 gene_biotype:Mt_tRNA_pseudogene transcript_biotype:Mt_tRNA_pseudogene		-5.97786	0.00199601	0.0213908	0.035321	1	1	1	1.01236	1.6478	0.00419047	1.66817	0.00415492
32679	1118	ML	7902290	CTH: cystathionase (cystathionine gamma-lyase)		-4.58668	0.00199601	0.0213908	0.035321	1	1	1	1.01235	3.30857	0.0121989	3.34943	0.00945216
31857	2678	ML	8109194	SLC26A2: solute carrier family 26 (sulfate transporter), member 2		-3.30005	0.00199601	0.0213908	0.035321	1	1	1	1.01232	3.21303	0.0157272	3.25263	0.0135884
30910	4753	ML	8021768	TSHZ1: teashirt zinc finger homeobox 1		-2.51091	0.00199601	0.0213908	0.035321	1	1	1	1.01232	2.79937	0.0153448	2.83387	0.0181907
31094	4328	ML	8053576	RNF103: ring finger protein 103		-2.63852	0.00199601	0.0213908	0.035321	1	1	1	1.01232	3.01257	0.01075	3.04967	0.0218532
31306	3858	ML	8175647	CD99L2: CD99 molecule-like 2		-2.78839	0.00199601	0.0213908	0.035321	1	1	1	1.01231	3.084	0.019902	3.12197	0.0126528
30715	5224	ML	8176193	F8: coagulation factor VIII, procoagulant component		-2.38471	0.00199601	0.0213908	0.035321	1	1	1	1.0123	2.76357	0.0215187	2.79757	0.012115
28664	10227	ML	8169437	HMGB3P30: high mobility group box 3 pseudogene 30		-1.54793	0.00199601	0.0213908	0.035321	1	1	1	1.01227	2.56767	0.0153549	2.59917	0.0317264
32036	2310	ML	7916541	DAB1: disabled homolog 1 (Drosophila)		-3.50469	0.00199601	0.0213908	0.035321	1	1	1	1.01226	3.22647	0.0181979	3.26603	0.00715565
32920	654	ML	8072926	H1F0: H1 histone family, member 0		-5.49523	0.00199601	0.0213908	0.035321	1	1	1	1.01226	3.47197	0.00920018	3.51453	0.00976542
32613	1221	ML	8024255	MUM1: melanoma associated antigen (mutated) 1		-4.45253	0.00199601	0.0213908	0.035321	1	1	1	1.01226	3.15667	0.0112291	3.19537	0.0100271
31727	2953	ML	8080964	GXYLT2: glucoside xylosyltransferase 2		-3.15885	0.00199601	0.0213908	0.035321	1	1	1	1.01225	3.20537	0.0193918	3.24463	0.00935539
32562	1321	ML	8120883	DOPEY1: dopey family member 1		-4.31487	0.00199601	0.0213908	0.035321	1	1	1	1.01224	3.17023	0.0151738	3.20903	0.00351188
28835	9807	ML	8092065	RNY5P3: RNA, Ro-associated Y5 pseudogene 3		-1.60082	0.00199601	0.0213908	0.035321	1	1	1	1.01223	2.3148	0.00557584	2.3431	0.030108
31023	4495	ML	8044417	TMEM87B: transmembrane protein 87B		-2.58969	0.00199601	0.0213908	0.035321	1	1	1	1.01222	3.10353	0.015232	3.14147	0.0202895
30811	4990	ML	8078958	8078958: unannotated transcript: chr3:40250496-40250795		-2.44223	0.00199601	0.0213908	0.035321	1	1	1	1.01221	2.43067	0.0187769	2.46033	0.00949228
30454	5824	ML	8079433	PTH1R: parathyroid hormone 1 receptor		-2.24538	0.00199601	0.0213908	0.035321	1	1	1	1.0122	2.94527	0.0216218	2.9812	0.0173439
33099	320	ML	8144412	LOC349196: uncharacterized LOC349196		-6.82416	0.00199601	0.0213908	0.035321	1	1	1	1.01219	2.9551	0.00786893	2.99113	0.00466083
33100	319	ML	8144414	LOC349196: uncharacterized LOC349196		-6.82416	0.00199601	0.0213908	0.035321	1	1	1	1.01219	2.9551	0.00786893	2.99113	0.00466083
32909	673	ML	8090070	ADCY5: adenylate cyclase 5		-5.41808	0.00199601	0.0213908	0.035321	1	1	1	1.01219	3.15687	0.0095296	3.19533	0.00777196
29842	7324	ML	8088020	ITIH4: inter-alpha-trypsin inhibitor heavy chain family, member 4		-1.95009	0.00199601	0.0213908	0.035321	1	1	1	1.01218	2.87893	0.00330202	2.914	0.0309703
31871	2655	ML	8052355	EFEMP1: EGF containing fibulin-like extracellular matrix protein 1		-3.30834	0.00199601	0.0213908	0.035321	1	1	1	1.01218	3.30317	0.0191218	3.3434	0.00883403
31542	3306	ML	8021484	CDH20: cadherin 20, type 2		-2.99848	0.00199601	0.0213908	0.035321	1	1	1	1.01217	2.71327	0.0151348	2.7463	0.0116207
32913	667	ML	8007471	NBR1: neighbor of BRCA1 gene 1		-5.44071	0.00199601	0.0213908	0.035321	1	1	1	1.01217	3.23897	0.0115578	3.2784	0.0049
30903	4767	ML	7985662	PDE8A: phosphodiesterase 8A		-2.50637	0.00199601	0.0213908	0.035321	1	1	1	1.01216	2.98953	0.0119081	3.0259	0.0221312
31214	4063	ML	8102831	MGARP: mitochondria-localized glutamic acid-rich protein		-2.71822	0.00199601	0.0213908	0.035321	1	1	1	1.01216	2.81807	0.013624	2.85233	0.0170629
31605	3196	ML	7986110	FES: feline sarcoma oncogene		-3.04645	0.00199601	0.0213908	0.035321	1	1	1	1.01216	2.9418	0.0145709	2.97757	0.0141846
30776	5078	ML	8081458	ENST00000481326: ncrna_pseudogene:Mt_tRNA_pseudogene chromosome:GRCh37:3:106620951:106621019:1 gene:ENSG00000239496 gene_biotype:Mt_tRNA_pseudogene transcript_biotype:Mt_tRNA_pseudogene		-2.41909	0.00199601	0.0213908	0.035321	1	1	1	1.01216	1.99643	0.00325167	2.0207	0.0170678
32844	801	ML	8139859	GUSB: glucuronidase, beta		-5.1181	0.00199601	0.0213908	0.035321	1	1	1	1.01215	3.24593	0.0102344	3.28537	0.00856407
33001	493	ML	7901951	PGM1: phosphoglucomutase 1		-6.01074	0.00199601	0.0213908	0.035321	1	1	1	1.01214	3.5078	0.0102528	3.5504	0.00675056
31588	3226	ML	7967039	MSI1: musashi homolog 1 (Drosophila)		-3.03362	0.00199601	0.0213908	0.035321	1	1	1	1.01213	3.3297	0.010714	3.3701	0.0204272
33148	243	ML	8017402	STRADA: STE20-related kinase adaptor alpha		-7.42659	0.00199601	0.0213908	0.035321	1	1	1	1.01213	3.0907	0.00325115	3.1282	0.00811911
30745	5161	ML	8055697	RBM43: RNA binding motif protein 43		-2.39986	0.00199601	0.0213908	0.035321	1	1	1	1.01212	2.76983	0.0218287	2.8034	0.0105076
32116	2166	ML	8145005	EPB49: erythrocyte membrane protein band 4.9 (dematin)		-3.60211	0.00199601	0.0213908	0.035321	1	1	1	1.0121	2.75137	0.0113931	2.78467	0.0112509
31161	4180	ML	7945347	7945347: unannotated transcript: chr11:152999-153102		-2.69001	0.00199601	0.0213908	0.035321	1	1	1	1.0121	3.31733	0.00876375	3.35747	0.0243097
31162	4174	ML	8102530	8102530: unannotated transcript: chr4:120355160-120355263		-2.69001	0.00199601	0.0213908	0.035321	1	1	1	1.0121	3.31733	0.00876375	3.35747	0.0243097
31163	4178	ML	8137668	8137668: unannotated transcript: chr16:90211000-90211103		-2.69001	0.00199601	0.0213908	0.035321	1	1	1	1.0121	3.31733	0.00876375	3.35747	0.0243097
31164	4176	ML	7924463	7924463: unannotated transcript: chr1:222676974-222677077		-2.69001	0.00199601	0.0213908	0.035321	1	1	1	1.0121	3.31733	0.00876375	3.35747	0.0243097
31165	4177	ML	7998115	7998115: unannotated transcript: chr16:90211000-90211103		-2.69001	0.00199601	0.0213908	0.035321	1	1	1	1.0121	3.31733	0.00876375	3.35747	0.0243097
31166	4175	ML	7911331	7911331: unannotated transcript: chr1:157784-157887		-2.69001	0.00199601	0.0213908	0.035321	1	1	1	1.0121	3.31733	0.00876375	3.35747	0.0243097
31167	4179	ML	7927089	7927089: unannotated transcript: chr10:38712553-38712656		-2.69001	0.00199601	0.0213908	0.035321	1	1	1	1.0121	3.31733	0.00876375	3.35747	0.0243097
31168	4173	ML	8031997	8031997: unannotated transcript: chr19:223158-223261		-2.69001	0.00199601	0.0213908	0.035321	1	1	1	1.0121	3.31733	0.00876375	3.35747	0.0243097
33101	318	ML	7954810	LRRK2: leucine-rich repeat kinase 2		-6.82512	0.00199601	0.0213908	0.035321	1	1	1	1.01209	2.2307	0.00122882	2.25767	0.00673226
30580	5549	ML	7919815	CTSK: cathepsin K		-2.30721	0.00199601	0.0213908	0.035321	1	1	1	1.01209	3.0532	0.0238019	3.0901	0.0141715
31970	2447	ML	7964872	PTPRB: protein tyrosine phosphatase, receptor type, B		-3.42238	0.00199601	0.0213908	0.035321	1	1	1	1.01207	2.48297	0.01194	2.51293	0.00935111
32757	969	ML	7980271	NEK9: NIMA (never in mitosis gene a)- related kinase 9		-4.81452	0.00199601	0.0213908	0.035321	1	1	1	1.01207	3.2601	0.0125861	3.29943	0.0064671
30782	5057	ML	8142345	DOCK4: dedicator of cytokinesis 4		-2.42439	0.00199601	0.0213908	0.035321	1	1	1	1.01206	3.1236	0.0257583	3.16127	0.00778867
30769	5092	ML	7894173	7894173: unannotated transcript: ---:-------		-2.41649	0.00199601	0.0213908	0.035321	1	1	1	1.01206	2.85847	0.0241009	2.89293	0.00542709
33243	100	ML	7971820	VPS36: vacuolar protein sorting 36 homolog (S. cerevisiae)		-9.1479	0.00199601	0.0213908	0.035321	1	1	1	1.01205	3.2348	0.00651997	3.27377	0.00345302
31580	3245	ML	8041759	SIX3: SIX homeobox 3		-3.02456	0.00199601	0.0213908	0.035321	1	1	1	1.01205	2.8476	0.00725052	2.8819	0.0182551
30446	5857	ML	7947421	ENST00000384081: ncrna:misc_RNA chromosome:GRCh37:11:33192927:33193036:-1 gene:ENSG00000206808 gene_biotype:misc_RNA transcript_biotype:misc_RNA		-2.23668	0.00199601	0.0213908	0.035321	1	1	1	1.01204	2.85927	0.0261452	2.8937	0.00523737
32442	1559	ML	8074316	GGT2: gamma-glutamyltransferase 2		-4.08337	0.00199601	0.0213908	0.035321	1	1	1	1.01204	3.14207	0.0127845	3.1799	0.0097
32448	1548	ML	7946401	ST5: suppression of tumorigenicity 5		-4.10008	0.00199601	0.0213908	0.035321	1	1	1	1.01204	3.0659	0.014501	3.1028	0.00571927
32213	1965	ML	7958582	TCHP: trichoplein, keratin filament binding		-3.74676	0.00199601	0.0213908	0.035321	1	1	1	1.01203	3.12127	0.00276466	3.1588	0.0171292
31533	3317	ML	7973352	LRP10: low density lipoprotein receptor-related protein 10		-2.99407	0.00199601	0.0213908	0.035321	1	1	1	1.01201	3.15047	0.0214975	3.1883	0.00410731
31718	2968	ML	7965884	PAH: phenylalanine hydroxylase		-3.15065	0.00199601	0.0213908	0.035321	1	1	1	1.01197	3.1026	0.0202067	3.13973	0.00290057
31043	4449	ML	8013294	TBC1D28: TBC1 domain family, member 28		-2.60623	0.00199601	0.0213908	0.035321	1	1	1	1.01196	2.7891	0.0190494	2.82247	0.0113509
33214	147	ML	7976000	ADCK1: aarF domain containing kinase 1		-8.46827	0.00199601	0.0213908	0.035321	1	1	1	1.01196	3.18827	0.00301717	3.2264	0.00719236
32663	1140	ML	8061122	BANF2: barrier to autointegration factor 2		-4.55249	0.00199601	0.0213908	0.035321	1	1	1	1.01196	2.67327	0.00907212	2.70523	0.00810021
32453	1539	ML	8091422	WWTR1: WW domain containing transcription regulator 1		-4.11089	0.00199601	0.0213908	0.035321	1	1	1	1.01196	3.22243	0.0111957	3.26097	0.0117577
33140	252	ML	8168215	MED12: mediator complex subunit 12		-7.31799	0.00199601	0.0213908	0.035321	1	1	1	1.01195	3.3181	0.00851587	3.35777	0.00395264
33212	151	ML	8111124	MARCH11: membrane-associated ring finger (C3HC4) 11		-8.40164	0.00199601	0.0213908	0.035321	1	1	1	1.01194	2.4758	0.00459239	2.50537	0.00400791
31035	4472	ML	8087224	SLC25A20: solute carrier family 25 (carnitine/acylcarnitine translocase), member 20		-2.59987	0.00199601	0.0213908	0.035321	1	1	1	1.01194	2.89523	0.014382	2.9298	0.0179853
29776	7459	ML	7964832	GENSCAN00000016119: cdna:genscan chromosome:GRCh37:12:69036294:69036846:-1 transcript_biotype:protein_coding		-1.92639	0.00199601	0.0213908	0.035321	1	1	1	1.01193	3.2622	0.0347682	3.30113	0.00406981
30872	4848	ML	8125373	GPSM3: G-protein signaling modulator 3		-2.48047	0.00199601	0.0213908	0.035321	1	1	1	1.01192	2.9844	0.00651844	3.01997	0.0239646
30873	4849	ML	8179987	GPSM3: G-protein signaling modulator 3		-2.48047	0.00199601	0.0213908	0.035321	1	1	1	1.01192	2.9844	0.00651844	3.01997	0.0239646
32813	857	ML	8012843	ZNF18: zinc finger protein 18		-5.01013	0.00199601	0.0213908	0.035321	1	1	1	1.0119	3.06403	0.0121681	3.1005	0.00329697
31833	2725	ML	8054939	ENST00000411186: ncrna:misc_RNA chromosome:GRCh37:2:124626833:124627147:-1 gene:ENSG00000223118 gene_biotype:misc_RNA transcript_biotype:misc_RNA		-3.27202	0.00199601	0.0213908	0.035321	1	1	1	1.0119	2.94923	0.0123662	2.98433	0.0138673
32836	813	ML	8140129	ABHD11: abhydrolase domain containing 11		-5.09922	0.00199601	0.0213908	0.035321	1	1	1	1.0119	3.28337	0.00791349	3.32243	0.0106519
32222	1947	ML	8121095	ANKRD6: ankyrin repeat domain 6		-3.75682	0.00199601	0.0213908	0.035321	1	1	1	1.01188	3.15837	0.0162666	3.1959	0.00590254
32894	700	ML	8135392	HBP1: HMG-box transcription factor 1		-5.36541	0.00199601	0.0213908	0.035321	1	1	1	1.01188	3.15093	0.0104165	3.18837	0.00612563
33220	139	ML	8144410	LOC349196: uncharacterized LOC349196		-8.51133	0.00199601	0.0213908	0.035321	1	1	1	1.01188	2.9555	0.00451774	2.9906	0.00553263
30046	6865	ML	8096335	HERC6: HECT and RLD domain containing E3 ubiquitin protein ligase family member 6		-2.0255	0.00199601	0.0213908	0.035321	1	1	1	1.01187	3.0326	0.0303561	3.0686	0.00511762
32485	1474	ML	7990033	TLE3: transducin-like enhancer of split 3 (E(sp1) homolog, Drosophila)		-4.17208	0.00199601	0.0213908	0.035321	1	1	1	1.01186	3.30807	0.0125149	3.3473	0.0104245
33110	305	ML	8016909	MKS1: Meckel syndrome, type 1		-6.90477	0.00199601	0.0213908	0.035321	1	1	1	1.01185	3.1493	0.00727736	3.18663	0.00589435
31202	4086	ML	7981142	CLMN: calmin (calponin-like, transmembrane)		-2.71191	0.00199601	0.0213908	0.035321	1	1	1	1.01185	3.09663	0.0219582	3.13333	0.00820081
32413	1620	ML	8117655	ZNF193: zinc finger protein 193		-4.03579	0.00199601	0.0213908	0.035321	1	1	1	1.01185	3.04607	0.00668905	3.08217	0.0139747
31694	3014	ML	7904203	TSHB: thyroid stimulating hormone, beta		-3.13564	0.00199601	0.0213908	0.035321	1	1	1	1.01184	2.0519	0.00748064	2.0762	0.011145
29490	8206	ML	8025984	ZNF844: zinc finger protein 844		-1.81438	0.00199601	0.0213908	0.035321	1	1	1	1.01183	2.93727	0.0329389	2.972	0.00379868
32430	1584	ML	8065403	CST3: cystatin C		-4.06557	0.00199601	0.0213908	0.035321	1	1	1	1.01181	3.38007	0.0122272	3.42	0.0118292
30982	4585	ML	8041640	LOC100129726: uncharacterized LOC100129726		-2.56436	0.00199601	0.0213908	0.035321	1	1	1	1.01181	2.8444	0.0198371	2.878	0.0110241
31494	3410	ML	8069553	NRIP1: nuclear receptor interacting protein 1		-2.95422	0.00199601	0.0213908	0.035321	1	1	1	1.01181	3.26777	0.0155513	3.30637	0.0164415
30933	4696	ML	8121015	C6orf165: chromosome 6 open reading frame 165		-2.52932	0.00199601	0.0213908	0.035321	1	1	1	1.01181	2.14497	0.0129624	2.1703	0.0115295
32969	562	ML	7896688	7896688: unannotated transcript: ---:-------		-5.76657	0.00199601	0.0213908	0.035321	1	1	1	1.01181	3.1559	0.0101799	3.19317	0.00465439
33177	198	ML	7922870	TRMT1L: tRNA methyltransferase 1 homolog (S. cerevisiae)-like		-7.82032	0.00199601	0.0213908	0.035321	1	1	1	1.0118	3.36053	0.00748955	3.4002	0.00459239
29644	7788	ML	7929383	SLC35G1: solute carrier family 35, member G1		-1.87425	0.00199601	0.0213908	0.035321	1	1	1	1.0118	3.1179	0.00792654	3.1547	0.0330713
31361	3720	ML	7955142	CACNB3: calcium channel, voltage-dependent, beta 3 subunit		-2.83	0.00199601	0.0213908	0.035321	1	1	1	1.0118	3.25977	0.0205242	3.29823	0.0115336
29617	7853	ML	8040477	ENST00000363959: ncrna:misc_RNA chromosome:GRCh37:2:20680605:20680716:1 gene:ENSG00000200829 gene_biotype:misc_RNA transcript_biotype:misc_RNA		-1.86402	0.00199601	0.0213908	0.035321	1	1	1	1.01179	2.7587	0.00127671	2.79123	0.030203
31109	4293	ML	8121685	DCBLD1: discoidin, CUB and LCCL domain containing 1		-2.65059	0.00199601	0.0213908	0.035321	1	1	1	1.01179	3.08503	0.0080928	3.1214	0.0223437
31604	3198	ML	8085768	RNY4P22: RNA, Ro-associated Y4 pseudogene 22		-3.04586	0.00199601	0.0213908	0.035321	1	1	1	1.01178	2.56277	0.0142732	2.59297	0.00955004
32930	634	ML	8095139	SRD5A3: steroid 5 alpha-reductase 3		-5.53353	0.00199601	0.0213908	0.035321	1	1	1	1.01177	3.23313	0.00864311	3.2712	0.00820183
30608	5472	ML	8139270	RASA4CP: RAS p21 protein activator 4C, pseudogene		-2.32536	0.00199601	0.0213908	0.035321	1	1	1	1.01176	3.2414	0.0260069	3.27953	0.0114199
31636	3127	ML	8095585	SLC4A4: solute carrier family 4, sodium bicarbonate cotransporter, member 4		-3.08269	0.00199601	0.0213908	0.035321	1	1	1	1.01175	2.82823	0.0116174	2.86147	0.0146186
32852	781	ML	8162759	TBC1D2: TBC1 domain family, member 2		-5.15323	0.00199601	0.0213908	0.035321	1	1	1	1.01174	3.083	0.00796994	3.1192	0.00919348
29935	7124	ML	7993756	ACSM3: acyl-CoA synthetase medium-chain family member 3		-1.98307	0.00199601	0.0213908	0.035321	1	1	1	1.01173	2.99797	0.030041	3.03313	0.00640026
32854	777	ML	7953626	CLSTN3: calsyntenin 3		-5.16453	0.00199601	0.0213908	0.035321	1	1	1	1.01173	3.21987	0.010551	3.25763	0.00700738
32656	1151	ML	8041913	PPP1R21: protein phosphatase 1, regulatory subunit 21		-4.52804	0.00199601	0.0213908	0.035321	1	1	1	1.01172	3.16263	0.00631216	3.1997	0.0126961
32092	2219	ML	7911341	7911341: unannotated transcript: chr1:566376-566441		-3.56127	0.00199601	0.0213908	0.035321	1	1	1	1.01171	3.3238	0.0079	3.36273	0.0172088
33035	428	ML	8126750	ENPP5: ectonucleotide pyrophosphatase/phosphodiesterase 5 (putative)		-6.25737	0.00199601	0.0213908	0.035321	1	1	1	1.01171	3.21497	0.00586032	3.2526	0.0086122
33095	330	ML	8102171	TBCK: TBC1 domain containing kinase		-6.75963	0.00199601	0.0213908	0.035321	1	1	1	1.01169	3.358	0.00750267	3.39727	0.00670398
31353	3733	ML	7923003	7923003: unannotated transcript: chr1:190950126-190950223		-2.82541	0.00199601	0.0213908	0.035321	1	1	1	1.01169	1.69933	0.00715565	1.7192	0.00985495
29145	9060	ML	8074591	RIMBP3: RIMS binding protein 3		-1.69153	0.00199601	0.0213908	0.035321	1	1	1	1.01169	2.6175	0.016432	2.6481	0.0266786
31976	2431	ML	8156861	STX17: syntaxin 17		-3.43202	0.00199601	0.0213908	0.035321	1	1	1	1.01167	3.24687	0.0121829	3.28477	0.0147453
33247	95	ML	7920877	ARHGEF2: Rho/Rac guanine nucleotide exchange factor (GEF) 2		-9.24643	0.00199601	0.0213908	0.035321	1	1	1	1.01167	3.26187	0.00705998	3.29993	0.00100167
32242	1910	ML	8097252	BBS12: Bardet-Biedl syndrome 12		-3.77956	0.00199601	0.0213908	0.035321	1	1	1	1.01167	2.70307	0.0111384	2.7346	0.00920652
33270	44	ML	8084818	CCDC50: coiled-coil domain containing 50		-10.8914	0.00199601	0.0213908	0.035321	1	1	1	1.01166	3.30193	0.00591974	3.34043	0.00156312
32293	1819	ML	7989159	ZNF280D: zinc finger protein 280D		-3.86304	0.00199601	0.0213908	0.035321	1	1	1	1.01164	3.12077	0.0146429	3.1571	0.00713933
27955	11920	ML	8163181	C9orf152: chromosome 9 open reading frame 152		-1.36085	0.00199601	0.0213908	0.035321	1	1	1	1.01164	2.2828	0.00173494	2.30937	0.0337687
31755	2900	ML	7920128	S100A11: S100 calcium binding protein A11		-3.18607	0.00199601	0.0213908	0.035321	1	1	1	1.01163	3.4911	0.0123887	3.5317	0.0182666
31609	3185	ML	7978676	NKX2-1: NK2 homeobox 1		-3.05271	0.00199601	0.0213908	0.035321	1	1	1	1.01162	2.5817	0.00780833	2.6117	0.0151248
30779	5065	ML	7898357	MST1: macrophage stimulating 1 (hepatocyte growth factor-like)		-2.42263	0.00199601	0.0213908	0.035321	1	1	1	1.01162	2.93583	0.0165537	2.96993	0.0178981
32538	1366	ML	8106403	F2RL1: coagulation factor II (thrombin) receptor-like 1		-4.26613	0.00199601	0.0213908	0.035321	1	1	1	1.01161	3.37433	0.00462313	3.4135	0.0152148
33119	292	ML	8027297	ZNF738: zinc finger protein 738		-6.9815	0.00199601	0.0213908	0.035321	1	1	1	1.01161	3.4266	0.00635059	3.46637	0.00755006
31193	4109	ML	8134680	ZKSCAN1: zinc finger with KRAB and SCAN domains 1		-2.70711	0.00199601	0.0213908	0.035321	1	1	1	1.0116	3.10763	0.00945798	3.14367	0.0210253
31013	4511	ML	7989387	VPS13C: vacuolar protein sorting 13 homolog C (S. cerevisiae)		-2.58481	0.00199601	0.0213908	0.035321	1	1	1	1.01159	3.18777	0.0183348	3.2247	0.0166232
32058	2273	ML	8011331	8011331: unannotated transcript: chr17:3181184-3289587		-3.52897	0.00199601	0.0213908	0.035321	1	1	1	1.01158	2.752	0.00720902	2.78387	0.01388
31409	3607	ML	8120783	MYO6: myosin VI		-2.87569	0.00199601	0.0213908	0.035321	1	1	1	1.01158	3.32777	0.0169438	3.3663	0.0158606
30994	4560	ML	8005132	MEIS3P2: Meis homeobox 3 pseudogene 2		-2.57171	0.00199601	0.0213908	0.035321	1	1	1	1.01157	3.26643	0.0069515	3.30423	0.0244909
32694	1095	ML	8168984	BHLHB9: basic helix-loop-helix domain containing, class B, 9		-4.6171	0.00199601	0.0213908	0.035321	1	1	1	1.01157	3.13163	0.0117347	3.16787	0.00685954
31115	4279	ML	8103706	AADAT: aminoadipate aminotransferase		-2.65484	0.00199601	0.0213908	0.035321	1	1	1	1.01157	3.3112	0.0229791	3.3495	0.00981478
32705	1079	ML	8112918	ENST00000465302: ncrna_pseudogene:Mt_tRNA_pseudogene chromosome:GRCh37:5:79947884:79947954:-1 gene:ENSG00000240312 gene_biotype:Mt_tRNA_pseudogene transcript_biotype:Mt_tRNA_pseudogene		-4.64454	0.00199601	0.0213908	0.035321	1	1	1	1.01156	3.10323	0.00891198	3.1391	0.00997397
31742	2923	ML	7926836	RAB18: RAB18, member RAS oncogene family		-3.17361	0.00199601	0.0213908	0.035321	1	1	1	1.01155	3.39893	0.0189297	3.4382	0.0100464
31257	3950	ML	8128553	BVES: blood vessel epicardial substance		-2.75429	0.00199601	0.0213908	0.035321	1	1	1	1.01155	3.17983	0.0156928	3.21657	0.0169512
32421	1602	ML	7946567	ENST00000496486: ncrna_pseudogene:Mt_tRNA_pseudogene chromosome:GRCh37:11:10531757:10531827:-1 gene:ENSG00000243043 gene_biotype:Mt_tRNA_pseudogene transcript_biotype:Mt_tRNA_pseudogene		-4.051	0.00199601	0.0213908	0.035321	1	1	1	1.01155	3.44627	0.0160004	3.48607	0.00579339
30665	5329	ML	7947027	UEVLD: UEV and lactate/malate dehyrogenase domains		-2.35858	0.00199601	0.0213908	0.035321	1	1	1	1.01154	3.0987	0.0220027	3.13447	0.0143445
31967	2453	ML	7892967	7892967: unannotated transcript: ---:-------		-3.42009	0.00199601	0.0213908	0.035321	1	1	1	1.01151	3.57517	0.0203013	3.61633	0.00474377
29447	8331	ML	8015806	ETV4: ets variant 4		-1.79466	0.00199601	0.0213908	0.035321	1	1	1	1.01149	3.29013	0.0296348	3.32793	0.0212759
32283	1839	ML	8034227	RGL3: ral guanine nucleotide dissociation stimulator-like 3		-3.84903	0.00199601	0.0213908	0.035321	1	1	1	1.01149	3.1685	0.0132011	3.2049	0.00969691
31399	3633	ML	8044931	ENST00000364136: ncrna:misc_RNA chromosome:GRCh37:2:121408849:121408950:1 gene:ENSG00000201006 gene_biotype:misc_RNA transcript_biotype:misc_RNA		-2.86185	0.00199601	0.0213908	0.035321	1	1	1	1.01148	1.7124	0.0106165	1.73207	0.00538176
32614	1220	ML	8097445	ENST00000384055: ncrna:snRNA chromosome:GRCh37:4:132194397:132194503:1 gene:ENSG00000206782 gene_biotype:snRNA transcript_biotype:snRNA		-4.45327	0.00199601	0.0213908	0.035321	1	1	1	1.01148	1.86757	0.00620511	1.889	0.00556687
32602	1238	ML	8129880	PERP: PERP, TP53 apoptosis effector		-4.43519	0.00199601	0.0213908	0.035321	1	1	1	1.01147	3.47853	0.00432474	3.51843	0.0149697
32605	1235	ML	8002975	CDYL2: chromodomain protein, Y-like 2		-4.43645	0.00199601	0.0213908	0.035321	1	1	1	1.01147	2.91217	0.00515493	2.94557	0.0119776
32939	616	ML	7929562	ZNF518A: zinc finger protein 518A		-5.57897	0.00199601	0.0213908	0.035321	1	1	1	1.01147	3.27857	0.0106171	3.31617	0.00485215
32124	2150	ML	8027674	ZNF302: zinc finger protein 302		-3.60851	0.00199601	0.0213908	0.035321	1	1	1	1.01146	3.25023	0.0128722	3.28747	0.0123977
33263	68	ML	8142087	ATXN7L1: ataxin 7-like 1		-9.90888	0.00199601	0.0213908	0.035321	1	1	1	1.01145	3.29467	0.00521664	3.3324	0.00403609
32891	710	ML	8064637	C20orf194: chromosome 20 open reading frame 194		-5.32484	0.00199601	0.0213908	0.035321	1	1	1	1.01145	3.13823	0.00513939	3.17417	0.0104978
30978	4595	ML	7959016	LINC00173: long intergenic non-protein coding RNA 173		-2.56098	0.00199601	0.0213908	0.035321	1	1	1	1.01145	2.94967	0.0190707	2.98343	0.0125636
31638	3122	ML	8119918	C6orf223: chromosome 6 open reading frame 223		-3.08395	0.00199601	0.0213908	0.035321	1	1	1	1.01144	2.84177	0.0133167	2.87427	0.0124837
30672	5306	ML	7974047	SSTR1: somatostatin receptor 1		-2.36492	0.00199601	0.0213908	0.035321	1	1	1	1.01141	2.93397	0.0244199	2.96743	0.00210792
33246	97	ML	7963024	LMBR1L: limb region 1 homolog (mouse)-like		-9.17669	0.00199601	0.0213908	0.035321	1	1	1	1.0114	3.23657	0.00589604	3.27347	0.0037072
32508	1422	ML	7955250	PRPF40B: PRP40 pre-mRNA processing factor 40 homolog B (S. cerevisiae)		-4.21467	0.00199601	0.0213908	0.035321	1	1	1	1.0114	3.10283	0.0142043	3.1382	0.00307896
31229	4021	ML	8162823	RN5S290: RNA, 5S ribosomal 290		-2.72805	0.00199601	0.0213908	0.035321	1	1	1	1.01138	2.66167	0.00896902	2.69197	0.0170189
32786	912	ML	8180390	NM_001024463.2: Homo sapiens histidine acid phosphatase domain containing 2A (HISPPD2A), transcript variant 4, mRNA		-4.89197	0.00199601	0.0213908	0.035321	1	1	1	1.01138	3.1002	0.00914276	3.13547	0.00850431
32635	1190	ML	8115476	MED7: mediator complex subunit 7		-4.48099	0.00199601	0.0213908	0.035321	1	1	1	1.01135	3.04133	0.00811193	3.07587	0.0106006
30929	4704	ML	8070567	TFF3: trefoil factor 3 (intestinal)		-2.52769	0.00199601	0.0213908	0.035321	1	1	1	1.01135	2.83	0.00930376	2.86213	0.0199565
30771	5086	ML	7973709	NFATC4: nuclear factor of activated T-cells, cytoplasmic, calcineurin-dependent 4		-2.41771	0.00199601	0.0213908	0.035321	1	1	1	1.01135	3.10607	0.024678	3.14133	0.0054151
31785	2844	ML	8010770	SLC16A3: solute carrier family 16, member 3 (monocarboxylic acid transporter 4)		-3.20797	0.00199601	0.0213908	0.035321	1	1	1	1.01135	3.08487	0.0115526	3.11987	0.0149547
32189	2018	ML	8113303	ENST00000482735: ncrna_pseudogene:Mt_tRNA_pseudogene chromosome:GRCh37:5:97745805:97745872:-1 gene:ENSG00000244719 gene_biotype:Mt_tRNA_pseudogene transcript_biotype:Mt_tRNA_pseudogene		-3.70108	0.00199601	0.0213908	0.035321	1	1	1	1.01134	1.58447	0.00321299	1.60243	0.00777003
32394	1643	ML	8058344	TCONS_l2_00015083-XLOC_l2_008416: linc-SUMO1 chr2:-:203210997-203222427		-4.02199	0.00199601	0.0213908	0.035321	1	1	1	1.01134	2.46993	0.00816415	2.49793	0.00887374
33202	162	ML	7905324	C1orf56: chromosome 1 open reading frame 56		-8.21109	0.00199601	0.0213908	0.035321	1	1	1	1.01131	3.18217	0.00674191	3.21817	0.00349476
32601	1239	ML	7946228	TPP1: tripeptidyl peptidase I		-4.43494	0.00199601	0.0213908	0.035321	1	1	1	1.01131	3.34157	0.0144393	3.37937	0.003073
29693	7654	ML	7988327	PATL2: protein associated with topoisomerase II homolog 2 (yeast)		-1.89475	0.00199601	0.0213908	0.035321	1	1	1	1.01131	2.65023	0.0102237	2.6802	0.0254142
31125	4256	ML	8077123	CHKB-CPT1B: CHKB-CPT1B readthrough (non-protein coding)		-2.6617	0.00199601	0.0213908	0.035321	1	1	1	1.0113	3.21687	0.0221057	3.25323	0.00844768
29448	8329	ML	8137040	8137040: unannotated transcript: chr7:146008812-146008914		-1.79547	0.00199601	0.0213908	0.035321	1	1	1	1.0113	2.20363	0.0232384	2.22853	0.00607975
33255	83	ML	7963721	CALCOCO1: calcium binding and coiled-coil domain 1		-9.57827	0.00199601	0.0213908	0.035321	1	1	1	1.0113	3.1183	0.00301164	3.15353	0.00561456
32687	1104	ML	7901592	TCEANC2: transcription elongation factor A (SII) N-terminal and central domain containing 2		-4.60177	0.00199601	0.0213908	0.035321	1	1	1	1.0113	3.06903	0.0130316	3.1037	0.000655744
32667	1133	ML	8142104	ATXN7L1: ataxin 7-like 1		-4.56219	0.00199601	0.0213908	0.035321	1	1	1	1.01129	3.13623	0.00931146	3.17163	0.00969141
30183	6515	ML	8090518	KIAA1257: KIAA1257		-2.09305	0.00199601	0.0213908	0.035321	1	1	1	1.01126	2.91	0.00820549	2.94277	0.0258438
32118	2162	ML	7952056	CD3D: CD3d molecule, delta (CD3-TCR complex)		-3.60439	0.00199601	0.0213908	0.035321	1	1	1	1.01126	2.61123	0.0126433	2.64063	0.00630423
32701	1083	ML	8146794	PREX2: phosphatidylinositol-3,4,5-trisphosphate-dependent Rac exchange factor 2		-4.62903	0.00199601	0.0213908	0.035321	1	1	1	1.01126	3.31317	0.0137449	3.35047	0.00242143
30424	5907	ML	8166481	CXorf58: chromosome X open reading frame 58		-2.22441	0.00199601	0.0213908	0.035321	1	1	1	1.01125	2.0941	0.0180635	2.11767	0.00323161
31025	4491	ML	7987048	MTMR10: myotubularin related protein 10		-2.59169	0.00199601	0.0213908	0.035321	1	1	1	1.01125	3.28363	0.00466083	3.32057	0.0242389
33210	153	ML	8065637	COMMD7: COMM domain containing 7		-8.34334	0.00199601	0.0213908	0.035321	1	1	1	1.01125	3.28383	0.00465439	3.32077	0.00609289
32963	572	ML	7971573	RCBTB2: regulator of chromosome condensation (RCC1) and BTB (POZ) domain containing protein 2		-5.71666	0.00199601	0.0213908	0.035321	1	1	1	1.01124	3.13663	0.00671218	3.1719	0.00831384
32935	622	ML	7970844	KATNAL1: katanin p60 subunit A-like 1		-5.56116	0.00199601	0.0213908	0.035321	1	1	1	1.01124	3.0805	0.0100593	3.11513	0.00389401
32250	1894	ML	8086784	C3orf75: chromosome 3 open reading frame 75		-3.79913	0.00199601	0.0213908	0.035321	1	1	1	1.01123	3.09813	0.0134589	3.13293	0.00840079
32545	1357	ML	7990165	PARP6: poly (ADP-ribose) polymerase family, member 6		-4.27654	0.00199601	0.0213908	0.035321	1	1	1	1.01123	3.30013	0.0115154	3.3372	0.00963172
31373	3692	ML	8067033	KCNG1: potassium voltage-gated channel, subfamily G, member 1		-2.84163	0.00199601	0.0213908	0.035321	1	1	1	1.01123	3.1443	0.0139237	3.1796	0.0164037
32751	980	ML	7947784	ARFGAP2: ADP-ribosylation factor GTPase activating protein 2		-4.79152	0.00199601	0.0213908	0.035321	1	1	1	1.01123	3.19187	0.0107156	3.2277	0.00727736
33056	396	ML	8012274	LSMD1: LSM domain containing 1		-6.40343	0.00199601	0.0213908	0.035321	1	1	1	1.01121	3.23107	0.00785897	3.2673	0.00585577
28940	9553	ML	8139632	FIGNL1: fidgetin-like 1		-1.63094	0.00199601	0.0213908	0.035321	1	1	1	1.01121	3.05297	0.0348721	3.0872	0.0102796
31652	3094	ML	8139057	ELMO1: engulfment and cell motility 1		-3.09605	0.00199601	0.0213908	0.035321	1	1	1	1.0112	3.1658	0.0128557	3.20127	0.0151133
32023	2339	ML	7906969	ENST00000384354: ncrna:snRNA chromosome:GRCh37:1:164608802:164608908:1 gene:ENSG00000207082 gene_biotype:snRNA transcript_biotype:snRNA		-3.48913	0.00199601	0.0213908	0.035321	1	1	1	1.0112	3.02067	0.0110387	3.0545	0.0126582
32608	1230	ML	8063351	SLC9A8: solute carrier family 9, subfamily A (NHE8, cation proton antiporter 8), member 8		-4.44312	0.00199601	0.0213908	0.035321	1	1	1	1.0112	3.1226	0.00690724	3.15757	0.0117513
32419	1607	ML	8074716	GGT2: gamma-glutamyltransferase 2		-4.04667	0.00199601	0.0213908	0.035321	1	1	1	1.01119	3.1287	0.0126147	3.1637	0.00808022
33058	393	ML	7929882	SEMA4G: sema domain, immunoglobulin domain (Ig), transmembrane domain (TM) and short cytoplasmic domain, (semaphorin) 4G		-6.42084	0.00199601	0.0213908	0.035321	1	1	1	1.01118	3.09097	0.00726659	3.12553	0.00584323
31211	4070	ML	7913667	GALE: UDP-galactose-4-epimerase		-2.71521	0.00199601	0.0213908	0.035321	1	1	1	1.01118	3.0797	0.0127566	3.11413	0.0178814
31938	2527	ML	7975956	GSTZ1: glutathione S-transferase zeta 1		-3.38439	0.00199601	0.0213908	0.035321	1	1	1	1.01118	3.0531	0.013457	3.08723	0.0111384
30725	5208	ML	7998136	RHBDF1: rhomboid 5 homolog 1 (Drosophila)		-2.3893	0.00199601	0.0213908	0.035321	1	1	1	1.01118	3.29177	0.0149534	3.32857	0.0220922
33008	482	ML	8167369	HDAC6: histone deacetylase 6		-6.05471	0.00199601	0.0213908	0.035321	1	1	1	1.01118	3.20017	0.00736637	3.23593	0.00710094
31032	4478	ML	8162019	KIF27: kinesin family member 27		-2.5966	0.00199601	0.0213908	0.035321	1	1	1	1.01117	2.83753	0.0120093	2.86923	0.0174041
32546	1353	ML	8149151	LOC349196: uncharacterized LOC349196		-4.28569	0.00199601	0.0213908	0.035321	1	1	1	1.01117	2.9705	0.00980867	3.00367	0.00913583
32547	1352	ML	8149214	LOC349196: uncharacterized LOC349196		-4.28569	0.00199601	0.0213908	0.035321	1	1	1	1.01117	2.9705	0.00980867	3.00367	0.00913583
31360	3721	ML	8022666	CHST9: carbohydrate (N-acetylgalactosamine 4-0) sulfotransferase 9		-2.82935	0.00199601	0.0213908	0.035321	1	1	1	1.01116	3.1691	0.0180025	3.20447	0.0120272
31376	3687	ML	8060020	FLJ43879: FLJ43879 protein		-2.84258	0.00199601	0.0213908	0.035321	1	1	1	1.01116	2.6651	0.00471487	2.69483	0.017493
31273	3924	ML	7907146	TBX19: T-box 19		-2.76358	0.00199601	0.0213908	0.035321	1	1	1	1.01115	2.83603	0.0171471	2.86767	0.00995205
32008	2372	ML	7991469	FAM169B: family with sequence similarity 169, member B		-3.46452	0.00199601	0.0213908	0.035321	1	1	1	1.01115	2.65473	0.0015885	2.68433	0.0147127
32350	1708	ML	8174568	LHFPL1: lipoma HMGIC fusion partner-like 1		-3.96867	0.00199601	0.0213908	0.035321	1	1	1	1.01114	2.86283	0.0132198	2.89473	0.00436616
30847	4909	ML	7980923	TRIP11: thyroid hormone receptor interactor 11		-2.46776	0.00199601	0.0213908	0.035321	1	1	1	1.01112	3.06347	0.0208231	3.09753	0.0117517
28694	10148	ML	7925058	SNRPD2P2: small nuclear ribonucleoprotein D2 pseudogene 2		-1.55624	0.00199601	0.0213908	0.035321	1	1	1	1.01111	2.46053	0.00162583	2.48787	0.0303778
32762	959	ML	8001651	ZNF319: zinc finger protein 319		-4.82557	0.00199601	0.0213908	0.035321	1	1	1	1.01111	3.0068	0.00972163	3.0402	0.00701498
30918	4723	ML	8029280	CD177: CD177 molecule		-2.51974	0.00199601	0.0213908	0.035321	1	1	1	1.01109	3.1188	0.0159135	3.1534	0.0176757
31618	3166	ML	7967358	PITPNM2: phosphatidylinositol transfer protein, membrane-associated 2		-3.06098	0.00199601	0.0213908	0.035321	1	1	1	1.01109	2.92207	0.00973362	2.95447	0.0155362
32258	1882	ML	7905664	SLC27A3: solute carrier family 27 (fatty acid transporter), member 3		-3.80679	0.00199601	0.0213908	0.035321	1	1	1	1.01105	3.12773	0.0137747	3.1623	0.00759013
30431	5887	ML	8116313	C5orf60: chromosome 5 open reading frame 60		-2.23021	0.00199601	0.0213908	0.035321	1	1	1	1.01105	2.89883	0.0098764	2.93087	0.0228336
30753	5136	ML	8151890	TP53INP1: tumor protein p53 inducible nuclear protein 1		-2.40625	0.00199601	0.0213908	0.035321	1	1	1	1.01105	3.21017	0.0227847	3.24563	0.0115154
32872	744	ML	7921526	PIGM: phosphatidylinositol glycan anchor biosynthesis, class M		-5.23306	0.00199601	0.0213908	0.035321	1	1	1	1.01105	3.1894	0.010686	3.22463	0.0046694
33114	298	ML	8177232	KDM5D: lysine (K)-specific demethylase 5D		-6.93646	0.00199601	0.0213908	0.035321	1	1	1	1.01104	3.20837	0.00526245	3.2438	0.00711266
33207	156	ML	7909011	MDM4: Mdm4 p53 binding protein homolog (mouse)		-8.2998	0.00199601	0.0213908	0.035321	1	1	1	1.01104	3.30193	0.00759759	3.3384	0.00043589
33029	440	ML	8031992	LOC100506479: uncharacterized LOC100506479		-6.20865	0.00199601	0.0213908	0.035321	1	1	1	1.01104	3.33553	0.00881608	3.37237	0.00527857
32412	1621	ML	8021183	SCARNA17: small Cajal body-specific RNA 17		-4.03535	0.00199601	0.0213908	0.035321	1	1	1	1.01102	3.30223	0.0134552	3.33863	0.00794061
32214	1964	ML	8047248	PLCL1: phospholipase C-like 1		-3.74698	0.00199601	0.0213908	0.035321	1	1	1	1.01102	2.38907	0.00924464	2.4154	0.00791896
33097	323	ML	8012423	CTC1: CTS telomere maintenance complex component 1		-6.80263	0.00199601	0.0213908	0.035321	1	1	1	1.01102	3.1914	0.00589237	3.22657	0.00674191
32669	1129	ML	7960261	RAD52: RAD52 homolog (S. cerevisiae)		-4.57035	0.00199601	0.0213908	0.035321	1	1	1	1.01102	3.10373	0.00547205	3.13793	0.0117492
32834	816	ML	7944554	TMEM136: transmembrane protein 136		-5.09214	0.00199601	0.0213908	0.035321	1	1	1	1.01102	3.03183	0.00764286	3.06523	0.00840555
30518	5673	ML	8167897	RRAGB: Ras-related GTP binding B		-2.27677	0.00199601	0.0213908	0.035321	1	1	1	1.01101	3.0206	0.0104101	3.05387	0.0230674
30973	4603	ML	7980246	MLH3: mutL homolog 3 (E. coli)		-2.55911	0.00199601	0.0213908	0.035321	1	1	1	1.01101	3.0707	0.0217835	3.1045	0.00698642
32397	1640	ML	8004699	CHD3: chromodomain helicase DNA binding protein 3		-4.02588	0.00199601	0.0213908	0.035321	1	1	1	1.011	3.103	0.00494874	3.13713	0.0138262
33291	10	ML	8081128	NSUN3: NOP2/Sun domain family, member 3		-15.9694	0.00199601	0.0213908	0.035321	1	0.895	0.895	1.01099	3.20567	0.00220076	3.2409	0.0031241
32541	1363	ML	7923662	PIK3C2B: phosphoinositide-3-kinase, class 2, beta polypeptide		-4.26899	0.00199601	0.0213908	0.035321	1	1	1	1.01097	3.2013	0.0134123	3.23643	0.00482735
31138	4226	ML	8000779	TBX6: T-box 6		-2.6755	0.00199601	0.0213908	0.035321	1	1	1	1.01097	2.95263	0.0195684	2.98503	0.00755138
32855	776	ML	7953569	PTPN6: protein tyrosine phosphatase, non-receptor type 6		-5.16793	0.00199601	0.0213908	0.035321	1	1	1	1.01096	3.16313	0.010152	3.1978	0.00565066
32273	1860	ML	8136849	GSTK1: glutathione S-transferase kappa 1		-3.82455	0.00199601	0.0213908	0.035321	1	1	1	1.01095	3.28667	0.0141656	3.32267	0.00807114
32964	570	ML	8116607	DKFZP686I15217: uncharacterized LOC401232		-5.72666	0.00199601	0.0213908	0.035321	1	1	1	1.01095	2.90483	0.00718424	2.93663	0.00639479
32632	1195	ML	7896600	7896600: unannotated transcript: ---:-------		-4.47536	0.00199601	0.0213908	0.035321	1	1	1	1.01094	3.5169	0.0148536	3.55537	0.00100167
31848	2692	ML	7979473	DHRS7: dehydrogenase/reductase (SDR family) member 7		-3.29056	0.00199601	0.0213908	0.035321	1	1	1	1.01093	3.14613	0.0142043	3.18053	0.0112296
29489	8210	ML	8053325	TCONS_l2_00015845-XLOC_l2_008095: linc-LRRTM4-4 chr2:-:78639672-78769187		-1.81398	0.00199601	0.0213908	0.035321	1	1	1	1.01093	2.45413	0.00260064	2.48097	0.0254891
31445	3520	ML	8171708	CXorf23: chromosome X open reading frame 23		-2.90717	0.00199601	0.0213908	0.035321	1	1	1	1.01093	2.97347	0.0139343	3.00597	0.0134448
29573	7981	ML	8140556	HGF: hepatocyte growth factor (hepapoietin A; scatter factor)		-1.84499	0.00199601	0.0213908	0.035321	1	1	1	1.01093	2.3483	0.00667308	2.37397	0.023153
30800	5020	ML	7943263	AMOTL1: angiomotin like 1		-2.43291	0.00199601	0.0213908	0.035321	1	1	1	1.01093	3.19003	0.0223146	3.2249	0.0108724
30413	5933	ML	8120927	RWDD2A: RWD domain containing 2A		-2.21868	0.00199601	0.0213908	0.035321	1	1	1	1.01092	2.97253	0.0186162	3.005	0.0172
30567	5577	ML	7914648	PHC2: polyhomeotic homolog 2 (Drosophila)		-2.30169	0.00199601	0.0213908	0.035321	1	1	1	1.01092	3.04343	0.00363501	3.07667	0.0247429
31759	2894	ML	7903742	GSTM4: glutathione S-transferase mu 4		-3.18808	0.00199601	0.0213908	0.035321	1	1	1	1.01092	3.331	0.0148445	3.36737	0.0130385
32166	2070	ML	8015868	MPP2: membrane protein, palmitoylated 2 (MAGUK p55 subfamily member 2)		-3.65904	0.00199601	0.0213908	0.035321	1	1	1	1.01091	3.07547	0.00335012	3.10903	0.015532
30705	5246	ML	8030393	PRRG2: proline rich Gla (G-carboxyglutamic acid) 2		-2.37849	0.00199601	0.0213908	0.035321	1	1	1	1.01091	2.78937	0.0196561	2.8198	0.0102367
30477	5776	ML	8083092	ZBTB38: zinc finger and BTB domain containing 38		-2.25301	0.00199601	0.0213908	0.035321	1	1	1	1.01091	3.1601	0.00892356	3.19457	0.0249492
31603	3200	ML	7913582	ZNF436: zinc finger protein 436		-3.0453	0.00199601	0.0213908	0.035321	1	1	1	1.0109	2.90133	0.0140001	2.93297	0.0113006
32737	1001	ML	8013331	B9D1: B9 protein domain 1		-4.74855	0.00199601	0.0213908	0.035321	1	1	1	1.0109	3.09807	0.00427239	3.13183	0.0115518
32861	767	ML	8140504	MAGI2: membrane associated guanylate kinase, WW and PDZ domain containing 2		-5.17628	0.00199601	0.0213908	0.035321	1	1	1	1.01089	3.12633	0.0107733	3.16037	0.00369098
32199	1991	ML	8020889	ZNF397: zinc finger protein 397		-3.7223	0.00199601	0.0213908	0.035321	1	1	1	1.01088	3.1033	0.00147309	3.13707	0.015643
32137	2122	ML	8101701	PPM1K: protein phosphatase, Mg2+/Mn2+ dependent, 1K		-3.62448	0.00199601	0.0213908	0.035321	1	1	1	1.01088	2.93237	0.00770865	2.96427	0.0131516
32316	1771	ML	8117470	BTN2A3P: butyrophilin, subfamily 2, member A3, pseudogene		-3.90043	0.00199601	0.0213908	0.035321	1	1	1	1.01087	2.78173	0.0119926	2.81197	0.00603517
32415	1617	ML	8121002	C6orf162: chromosome 6 open reading frame 162		-4.0374	0.00199601	0.0213908	0.035321	1	1	1	1.01086	3.1546	0.00421426	3.18887	0.0140834
32301	1805	ML	8148501	PTP4A3: protein tyrosine phosphatase type IVA, member 3		-3.87667	0.00199601	0.0213908	0.035321	1	1	1	1.01085	3.31853	0.00800021	3.35453	0.0139536
33162	219	ML	8053142	RTKN: rhotekin		-7.64068	0.00199601	0.0213908	0.035321	1	1	1	1.01085	3.26417	0.00342101	3.29957	0.00725902
32994	508	ML	7975632	PTGR2: prostaglandin reductase 2		-5.96655	0.00199601	0.0213908	0.035321	1	1	1	1.01084	3.07073	0.00120139	3.10403	0.00959184
33130	271	ML	8031387	NCR1: natural cytotoxicity triggering receptor 1		-7.13814	0.00199601	0.0213908	0.035321	1	1	1	1.01084	2.98317	0.00293655	3.0155	0.0072753
32284	1838	ML	7978260	DHRS1: dehydrogenase/reductase (SDR family) member 1		-3.8492	0.00199601	0.0213908	0.035321	1	1	1	1.01084	3.1195	0.0142664	3.1533	0.00527162
30723	5210	ML	8038213	HSD17B14: hydroxysteroid (17-beta) dehydrogenase 14		-2.38921	0.00199601	0.0213908	0.035321	1	1	1	1.01083	2.93193	0.0180558	2.9637	0.0142944
31575	3251	ML	8077970	FBLN2: fibulin 2		-3.02313	0.00199601	0.0213908	0.035321	1	1	1	1.01083	3.21337	0.011607	3.24817	0.0162112
28763	9985	ML	8121755	8121755: unannotated transcript: chr6:122532794-122533025		-1.57995	0.00199601	0.0213908	0.035321	1	1	1	1.01082	2.7194	0.00838033	2.74883	0.0311596
32628	1198	ML	8014648	ENST00000364922: ncrna:snRNA chromosome:GRCh37:17:34773400:34773506:-1 gene:ENSG00000201792 gene_biotype:snRNA transcript_biotype:snRNA		-4.47247	0.00199601	0.0213908	0.035321	1	1	1	1.01081	2.0193	0.0058643	2.04113	0.00609125
32629	1199	ML	8006744	ENST00000364922: ncrna:snRNA chromosome:GRCh37:17:34773400:34773506:-1 gene:ENSG00000201792 gene_biotype:snRNA transcript_biotype:snRNA		-4.47247	0.00199601	0.0213908	0.035321	1	1	1	1.01081	2.0193	0.0058643	2.04113	0.00609125
32630	1197	ML	8014435	ENST00000364922: ncrna:snRNA chromosome:GRCh37:17:34773400:34773506:-1 gene:ENSG00000201792 gene_biotype:snRNA transcript_biotype:snRNA		-4.47247	0.00199601	0.0213908	0.035321	1	1	1	1.01081	2.0193	0.0058643	2.04113	0.00609125
32631	1196	ML	8019647	ENST00000364922: ncrna:snRNA chromosome:GRCh37:17:34773400:34773506:-1 gene:ENSG00000201792 gene_biotype:snRNA transcript_biotype:snRNA		-4.47247	0.00199601	0.0213908	0.035321	1	1	1	1.01081	2.0193	0.0058643	2.04113	0.00609125
32790	906	ML	8097098	USP53: ubiquitin specific peptidase 53		-4.9074	0.00199601	0.0213908	0.035321	1	1	1	1.01081	3.28197	0.00515008	3.31743	0.0114094
33189	181	ML	8060977	C20orf94: chromosome 20 open reading frame 94		-7.92708	0.00199601	0.0213908	0.035321	1	1	1	1.0108	3.12333	0.00178979	3.15707	0.00715006
33288	14	ML	8154916	GALT: galactose-1-phosphate uridylyltransferase		-14.3836	0.00199601	0.0213908	0.035321	1	0.895	0.895	1.01079	3.1299	0.00395095	3.16367	0.000960902
32099	2203	ML	8136115	FAM40B: family with sequence similarity 40, member B		-3.57255	0.00199601	0.0213908	0.035321	1	1	1	1.01078	3.111	0.0135532	3.14453	0.00897905
33053	400	ML	7893682	7893682: unannotated transcript: ---:-------		-6.37726	0.00199601	0.0213908	0.035321	1	1	1	1.01077	3.50633	0.0102178	3.5441	0.0009
32254	1887	ML	8164535	CRAT: carnitine O-acetyltransferase		-3.80306	0.00199601	0.0213908	0.035321	1	1	1	1.01075	3.13527	0.0126358	3.16897	0.00871225
29296	8708	ML	7905464	RIIAD1: regulatory subunit of type II PKA R-subunit (RIIa) domain containing 1		-1.73844	0.00199601	0.0213908	0.035321	1	1	1	1.01074	2.77443	0.0291284	2.80423	0.00575007
32172	2055	ML	7954969	IRAK4: interleukin-1 receptor-associated kinase 4		-3.67021	0.00199601	0.0213908	0.035321	1	1	1	1.01073	3.0541	0.00936002	3.08687	0.0123087
32811	860	ML	8171248	KAL1: Kallmann syndrome 1 sequence		-5.00496	0.00199601	0.0213908	0.035321	1	1	1	1.01072	3.47497	0.00160728	3.51223	0.0127962
31247	3984	ML	8110668	ENST00000410601: ncrna:snRNA chromosome:GRCh37:5:180728968:180729071:1 gene:ENSG00000222533 gene_biotype:snRNA transcript_biotype:snRNA		-2.74339	0.00199601	0.0213908	0.035321	1	1	1	1.01071	3.24177	0.0109929	3.2765	0.0189747
32689	1102	ML	8027862	FFAR2: free fatty acid receptor 2		-4.6052	0.00199601	0.0213908	0.035321	1	1	1	1.0107	2.58293	0.0063343	2.61057	0.00823974
30970	4612	ML	7969414	KLF5: Kruppel-like factor 5 (intestinal)		-2.55627	0.00199601	0.0213908	0.035321	1	1	1	1.01069	3.1222	0.00835045	3.15557	0.0210096
31838	2714	ML	7939546	CD82: CD82 molecule		-3.28235	0.00199601	0.0213908	0.035321	1	1	1	1.01068	3.18627	0.013706	3.2203	0.0116047
30056	6841	ML	8083808	LRRIQ4: leucine-rich repeats and IQ motif containing 4		-2.02952	0.00199601	0.0213908	0.035321	1	1	1	1.01067	2.34523	0.0200973	2.37027	0.0072473
30515	5677	ML	7951654	FDXACB1: ferredoxin-fold anticodon binding domain containing 1		-2.27551	0.00199601	0.0213908	0.035321	1	1	1	1.01067	2.7395	0.0100593	2.76873	0.019848
31333	3791	ML	7951437	GUCY1A2: guanylate cyclase 1, soluble, alpha 2		-2.80604	0.00199601	0.0213908	0.035321	1	1	1	1.01065	2.71583	0.010416	2.74477	0.0145074
30216	6419	ML	8005695	MEIS3P2: Meis homeobox 3 pseudogene 2		-2.1132	0.00199601	0.0213908	0.035321	1	1	1	1.01064	3.2161	0.0072753	3.25033	0.0270991
30898	4777	ML	8130528	RSPH3: radial spoke 3 homolog (Chlamydomonas)		-2.50149	0.00199601	0.0213908	0.035321	1	1	1	1.01064	2.98817	0.00810021	3.01997	0.0204745
33128	276	ML	8163328	PTGR1: prostaglandin reductase 1		-7.11921	0.00199601	0.0213908	0.035321	1	1	1	1.01064	3.28297	0.00158219	3.3179	0.00835045
31347	3744	ML	8000799	GDPD3: glycerophosphodiester phosphodiesterase domain containing 3		-2.82007	0.00199601	0.0213908	0.035321	1	1	1	1.01064	2.81343	0.0132719	2.84337	0.0127222
32736	1003	ML	8090690	CPNE4: copine IV		-4.74362	0.00199601	0.0213908	0.035321	1	1	1	1.01064	2.9525	0.00717565	2.9839	0.00894204
29352	8578	ML	7905606	NPR1: natriuretic peptide receptor A/guanylate cyclase A (atrionatriuretic peptide receptor A)		-1.75728	0.00199601	0.0213908	0.035321	1	1	1	1.01063	3.0189	0.0298226	3.051	0.010566
31293	3879	ML	8132092	INMT: indolethylamine N-methyltransferase		-2.77827	0.00199601	0.0213908	0.035321	1	1	1	1.01062	2.97053	0.0109738	3.00207	0.0163108
30951	4657	ML	8127542	ENST00000491042: ncrna_pseudogene:scRNA_pseudogene chromosome:GRCh37:6:74197313:74197600:-1 gene:ENSG00000240379 gene_biotype:scRNA_pseudogene transcript_biotype:scRNA_pseudogene		-2.5449	0.00199601	0.0213908	0.035321	1	1	1	1.0106	2.92553	0.0111778	2.95653	0.0178942
30617	5449	ML	8080306	PHF7: PHD finger protein 7		-2.33009	0.00199601	0.0213908	0.035321	1	1	1	1.0106	3.04203	0.0220926	3.07427	0.00927434
32458	1531	ML	7975889	VASH1: vasohibin 1		-4.12166	0.00199601	0.0213908	0.035321	1	1	1	1.01059	3.11213	0.0129326	3.1451	0.00496689
32735	1004	ML	8003722	SRR: serine racemase		-4.74349	0.00199601	0.0213908	0.035321	1	1	1	1.01058	3.21843	0.0102188	3.2525	0.00709295
31078	4361	ML	8024885	TNFAIP8L1: tumor necrosis factor, alpha-induced protein 8-like 1		-2.63041	0.00199601	0.0213908	0.035321	1	1	1	1.01058	2.9013	0.0154622	2.932	0.0130219
31153	4193	ML	7958011	ENST00000363063: ncrna:misc_RNA chromosome:GRCh37:12:102113586:102113696:1 gene:ENSG00000199933 gene_biotype:misc_RNA transcript_biotype:misc_RNA		-2.68392	0.00199601	0.0213908	0.035321	1	1	1	1.01058	2.89887	0.0146466	2.92953	0.0133095
32024	2338	ML	7919872	FAM63A: family with sequence similarity 63, member A		-3.48929	0.00199601	0.0213908	0.035321	1	1	1	1.01057	3.0609	0.00722703	3.09327	0.0143493
32812	858	ML	7930760	PNLIPRP3: pancreatic lipase-related protein 3		-5.00833	0.00199601	0.0213908	0.035321	1	1	1	1.01057	2.1662	0.00410366	2.1891	0.00677348
32495	1443	ML	8089029	DHFRL1: dihydrofolate reductase-like 1		-4.20526	0.00199601	0.0213908	0.035321	1	1	1	1.01056	2.89663	0.0102442	2.92723	0.00734189
32718	1043	ML	8110437	RMND5B: required for meiotic nuclear division 5 homolog B (S. cerevisiae)		-4.68207	0.00199601	0.0213908	0.035321	1	1	1	1.01056	3.307	0.00833727	3.34193	0.00987387
33154	233	ML	7923043	KCNT2: potassium channel, subfamily T, member 2		-7.47958	0.00199601	0.0213908	0.035321	1	1	1	1.01056	3.15557	0.00725971	3.1889	0.00262298
31840	2712	ML	7923221	DDX59: DEAD (Asp-Glu-Ala-Asp) box polypeptide 59		-3.28421	0.00199601	0.0213908	0.035321	1	1	1	1.01056	2.90313	0.0160531	2.9338	0.00196723
33124	283	ML	7967127	CAMKK2: calcium/calmodulin-dependent protein kinase kinase 2, beta		-7.03885	0.00199601	0.0213908	0.035321	1	1	1	1.01056	3.19033	0.00655464	3.22403	0.0050797
29919	7155	ML	7925523	TCONS_l2_00001893-XLOC_l2_001399: linc-PLD5-5 chr1:-:243244003-243251533		-1.97797	0.00199601	0.0213908	0.035321	1	1	1	1.01055	3.2127	0.0142454	3.2466	0.0260438
29920	7156	ML	8132690	TCONS_l2_00001893-XLOC_l2_001399: linc-PLD5-5 chr1:-:243244003-243251533		-1.97797	0.00199601	0.0213908	0.035321	1	1	1	1.01055	3.2127	0.0142454	3.2466	0.0260438
29921	7154	ML	7924551	TCONS_l2_00001893-XLOC_l2_001399: linc-PLD5-5 chr1:-:243244003-243251533		-1.97797	0.00199601	0.0213908	0.035321	1	1	1	1.01055	3.2127	0.0142454	3.2466	0.0260438
31639	3119	ML	7934553	ZNF503: zinc finger protein 503		-3.08538	0.00199601	0.0213908	0.035321	1	1	1	1.01055	2.90973	0.003139	2.94043	0.0169459
32290	1826	ML	8121712	SLC35F1: solute carrier family 35, member F1		-3.85919	0.00199601	0.0213908	0.035321	1	1	1	1.01055	3.30817	0.0096241	3.34307	0.0123581
32859	771	ML	8120222	EFHC1: EF-hand domain (C-terminal) containing 1		-5.17405	0.00199601	0.0213908	0.035321	1	1	1	1.01054	3.13977	0.00718424	3.17287	0.00843584
30264	6281	ML	7952451	LOC100130428: IGYY565		-2.14357	0.00199601	0.0213908	0.035321	1	1	1	1.01053	3.176	0.023654	3.20943	0.0130496
30761	5109	ML	8155602	ANKRD20A3: ankyrin repeat domain 20 family, member A3		-2.41185	0.00199601	0.0213908	0.035321	1	1	1	1.01053	2.57773	0.0166001	2.60487	0.0102041
31407	3614	ML	7895971	7895971: unannotated transcript: ---:-------		-2.87246	0.00199601	0.0213908	0.035321	1	1	1	1.01052	3.51917	0.0204099	3.5562	0.00906035
31148	4202	ML	8167006	RP2: retinitis pigmentosa 2 (X-linked recessive)		-2.68195	0.00199601	0.0213908	0.035321	1	1	1	1.01052	3.0887	0.0144855	3.1212	0.0151891
31780	2850	ML	7950743	RAB30: RAB30, member RAS oncogene family		-3.20513	0.00199601	0.0213908	0.035321	1	1	1	1.01052	3.07643	0.0162248	3.1088	0.00653376
32860	769	ML	8082100	PARP14: poly (ADP-ribose) polymerase family, member 14		-5.17558	0.00199601	0.0213908	0.035321	1	1	1	1.01052	3.15607	0.00762911	3.18927	0.00807733
31622	3155	ML	8168691	DIAPH2: diaphanous homolog 2 (Drosophila)		-3.06617	0.00199601	0.0213908	0.035321	1	1	1	1.01052	3.15673	0.0042501	3.18993	0.0182665
31574	3253	ML	7994463	ATP2A1: ATPase, Ca++ transporting, cardiac muscle, fast twitch 1		-3.02218	0.00199601	0.0213908	0.035321	1	1	1	1.01048	2.88083	0.0152513	2.91103	0.00818311
31412	3599	ML	8026780	PGLS: 6-phosphogluconolactonase		-2.87965	0.00199601	0.0213908	0.035321	1	1	1	1.01048	3.12663	0.0169512	3.1594	0.0100539
30337	6092	ML	8115196	ZNF300: zinc finger protein 300		-2.19016	0.00199601	0.0213908	0.035321	1	1	1	1.01047	3.02437	0.0246484	3.05603	0.00442869
32655	1153	ML	8048381	STK36: serine/threonine kinase 36		-4.52533	0.00199601	0.0213908	0.035321	1	1	1	1.01047	3.2162	0.00635925	3.24987	0.0112073
32585	1276	ML	8099304	ACOX3: acyl-CoA oxidase 3, pristanoyl		-4.38587	0.00199601	0.0213908	0.035321	1	1	1	1.01047	3.13367	0.00698307	3.16647	0.0109098
33108	307	ML	8084128	TTC14: tetratricopeptide repeat domain 14		-6.8949	0.00199601	0.0213908	0.035321	1	1	1	1.01047	3.17847	0.00819898	3.21173	0.00161658
32444	1554	ML	7908529	LHX9: LIM homeobox 9		-4.09117	0.00199601	0.0213908	0.035321	1	1	1	1.01046	2.66037	0.00640495	2.6882	0.0098909
32856	775	ML	7991427	VPS33B: vacuolar protein sorting 33 homolog B (yeast)		-5.16841	0.00199601	0.0213908	0.035321	1	1	1	1.01046	3.20247	0.00950912	3.23597	0.00596769
31716	2970	ML	7958692	TCTN1: tectonic family member 1		-3.1497	0.00199601	0.0213908	0.035321	1	1	1	1.01045	3.0445	0.0143168	3.0763	0.0100414
33064	384	ML	7955195	TROAP: trophinin associated protein (tastin)		-6.50564	0.00199601	0.0213908	0.035321	1	1	1	1.01044	3.21053	0.00727622	3.24407	0.00517333
32245	1906	ML	8164105	GOLGA1: golgin A1		-3.78488	0.00199601	0.0213908	0.035321	1	1	1	1.01044	2.98323	0.0127681	3.01437	0.00632166
32752	977	ML	8052834	C2orf42: chromosome 2 open reading frame 42		-4.79547	0.00199601	0.0213908	0.035321	1	1	1	1.01043	3.03093	0.011012	3.06253	0.00300056
32097	2210	ML	7896522	7896522: unannotated transcript: ---:-------		-3.56749	0.00199601	0.0213908	0.035321	1	1	1	1.01042	3.55973	0.017808	3.59683	0.00270617
32943	610	ML	8110055	CPEB4: cytoplasmic polyadenylation element binding protein 4		-5.60059	0.00199601	0.0213908	0.035321	1	1	1	1.01042	2.93083	0.00348473	2.96137	0.00877629
30043	6868	ML	8147992	ENST00000383992: ncrna:misc_RNA chromosome:GRCh37:8:114963115:114963227:1 gene:ENSG00000206719 gene_biotype:misc_RNA transcript_biotype:misc_RNA		-2.02486	0.00199601	0.0213908	0.035321	1	1	1	1.01042	2.47017	0.00834286	2.4959	0.0203698
32352	1706	ML	8009040	MRC2: mannose receptor, C type 2		-3.96962	0.00199601	0.0213908	0.035321	1	1	1	1.01041	3.1576	0.00819024	3.19047	0.0117717
29415	8422	ML	8144656	C8orf49: chromosome 8 open reading frame 49		-1.78282	0.00199601	0.0213908	0.035321	1	1	1	1.01041	2.64887	0.0206679	2.67643	0.0170321
28579	10428	ML	8026490	UCA1: urothelial cancer associated 1 (non-protein coding)		-1.52401	0.00199601	0.0213908	0.035321	1	1	1	1.01041	2.60097	0.0302794	2.62803	0.00542433
31367	3710	ML	8092251	GNB4: guanine nucleotide binding protein (G protein), beta polypeptide 4		-2.83446	0.00199601	0.0213908	0.035321	1	1	1	1.0104	3.3462	0.0169673	3.381	0.0128187
33075	363	ML	8160405	KLHL9: kelch-like 9 (Drosophila)		-6.61121	0.00199601	0.0213908	0.035321	1	1	1	1.0104	3.32057	0.00335012	3.3551	0.00840417
31974	2438	ML	7946742	CYP2R1: cytochrome P450, family 2, subfamily R, polypeptide 1		-3.42791	0.00199601	0.0213908	0.035321	1	1	1	1.01039	3.2771	0.0119578	3.31113	0.0123581
31888	2629	ML	8047337	ENST00000364867: ncrna:snRNA chromosome:GRCh37:2:201640307:201640473:1 gene:ENSG00000201737 gene_biotype:snRNA transcript_biotype:snRNA		-3.32322	0.00199601	0.0213908	0.035321	1	1	1	1.01037	1.76817	0.00582866	1.7865	0.00757166
31114	4283	ML	8071861	SUSD2: sushi domain containing 2		-2.65374	0.00199601	0.0213908	0.035321	1	1	1	1.01037	2.97103	0.00968779	3.00183	0.0176143
31631	3134	ML	8012924	FAM18B2: family with sequence similarity 18, member B2		-3.07858	0.00199601	0.0213908	0.035321	1	1	1	1.01034	2.90357	0.0141846	2.9336	0.00918205
31082	4353	ML	8161938	ENST00000384477: ncrna:snRNA chromosome:GRCh37:9:84340158:84340264:-1 gene:ENSG00000207206 gene_biotype:snRNA transcript_biotype:snRNA		-2.63216	0.00199601	0.0213908	0.035321	1	1	1	1.01034	2.43953	0.0150766	2.46477	0.00695725
32929	635	ML	7924499	TLR5: toll-like receptor 5		-5.53234	0.00199601	0.0213908	0.035321	1	1	1	1.01034	2.65423	0.00765136	2.68167	0.00390171
31429	3561	ML	7930311	GSTO2: glutathione S-transferase omega 2		-2.89423	0.00199601	0.0213908	0.035321	1	1	1	1.01033	3.08273	0.0178023	3.11457	0.00678258
31185	4126	ML	8000910	ZNF688: zinc finger protein 688		-2.70049	0.00199601	0.0213908	0.035321	1	1	1	1.01032	2.97113	0.0121039	3.0018	0.0155039
33033	432	ML	7933537	OGDHL: oxoglutarate dehydrogenase-like		-6.24356	0.00199601	0.0213908	0.035321	1	1	1	1.01032	3.1651	0.00554617	3.19777	0.00716682
29664	7738	ML	8084986	FYTTD1: forty-two-three domain containing 1		-1.88125	0.00199601	0.0213908	0.035321	1	1	1	1.01031	3.17503	0.0142465	3.20777	0.0265574
31228	4024	ML	8016476	HOXB9: homeobox B9		-2.72688	0.00199601	0.0213908	0.035321	1	1	1	1.0103	2.77257	0.00923165	2.80113	0.0156209
30727	5206	ML	8064245	TCEA2: transcription elongation factor A (SII), 2		-2.38991	0.00199601	0.0213908	0.035321	1	1	1	1.01029	3.24567	0.0231932	3.27907	0.00692917
32573	1299	ML	8085486	XPC: xeroderma pigmentosum, complementation group C		-4.34805	0.00199601	0.0213908	0.035321	1	1	1	1.01028	2.98313	0.0121706	3.0138	0.00105357
32741	993	ML	7906652	NIT1: nitrilase 1		-4.76524	0.00199601	0.0213908	0.035321	1	1	1	1.01027	3.17317	0.0100321	3.20577	0.00630582
31217	4059	ML	8165700	NC_001807: gi|17981852|ref|NC_001807.4|:c5827-5762; gene=TRNC; product=tRNA-Cys		-2.71889	0.00199601	0.0213908	0.035321	1	1	1	1.01025	3.3016	0.0145162	3.33543	0.0159318
31031	4479	ML	8039096	NLRP12: NLR family, pyrin domain containing 12		-2.59648	0.00199601	0.0213908	0.035321	1	1	1	1.01024	2.82977	0.0155555	2.85873	0.0114631
32355	1700	ML	7968703	NHLRC3: NHL repeat containing 3		-3.97338	0.00199601	0.0213908	0.035321	1	1	1	1.01023	3.18253	0.0106627	3.2151	0.0093723
33091	339	ML	8069301	COL6A2: collagen, type VI, alpha 2		-6.72218	0.00199601	0.0213908	0.035321	1	1	1	1.01022	3.30547	0.00389915	3.33923	0.00777775
30881	4828	ML	8018343	MIF4GD: MIF4G domain containing		-2.48594	0.00199601	0.0213908	0.035321	1	1	1	1.0102	3.176	0.0141418	3.2084	0.0175957
32596	1249	ML	8118111	HCP5: HLA complex P5 (non-protein coding)		-4.41272	0.00199601	0.0213908	0.035321	1	1	1	1.0102	2.94807	0.00304357	2.97813	0.0114023
32001	2386	ML	8142194	LAMB1: laminin, beta 1		-3.45534	0.00199601	0.0213908	0.035321	1	1	1	1.01019	3.44443	0.0103905	3.47953	0.0141987
31983	2418	ML	7978208	TINF2: TERF1 (TRF1)-interacting nuclear factor 2		-3.43826	0.00199601	0.0213908	0.035321	1	1	1	1.01017	3.2814	0.00776595	3.31477	0.0149072
30556	5599	ML	7995525	NKD1: naked cuticle homolog 1 (Drosophila)		-2.29651	0.00199601	0.0213908	0.035321	1	1	1	1.01015	3.12187	0.00864947	3.15357	0.0222891
32604	1236	ML	7996569	ENST00000366223: cdna:pseudogene chromosome:GRCh37:16:67466595:67468931:1 gene:ENSG00000203401 gene_biotype:pseudogene transcript_biotype:pseudogene		-4.43596	0.00199601	0.0213908	0.035321	1	1	1	1.01015	3.16047	0.0073146	3.19253	0.0101619
33290	11	ML	7982154	HERC2P2: hect domain and RLD 2 pseudogene 2		-15.4116	0.00199601	0.0213908	0.035321	1	0.895	0.895	1.01015	3.39073	0.00310215	3.42513	0.00230723
30798	5023	ML	7920839	RIT1: Ras-like without CAAX 1		-2.43265	0.00199601	0.0213908	0.035321	1	1	1	1.01014	3.1876	0.0185421	3.21993	0.0136445
31086	4346	ML	8124848	IER3: immediate early response 3		-2.634	0.00199601	0.0213908	0.035321	1	1	1	1.01014	3.20547	0.0142043	3.23797	0.0159676
31087	4345	ML	8179704	IER3: immediate early response 3		-2.634	0.00199601	0.0213908	0.035321	1	1	1	1.01014	3.20547	0.0142043	3.23797	0.0159676
32993	509	ML	8130211	SYNE1: spectrin repeat containing, nuclear envelope 1		-5.9657	0.00199601	0.0213908	0.035321	1	1	1	1.01014	2.67363	0.00640026	2.70073	0.00457639
30162	6568	ML	8062034	TP53INP2: tumor protein p53 inducible nuclear protein 2		-2.08294	0.00199601	0.0213908	0.035321	1	1	1	1.01014	3.06507	0.0200013	3.09613	0.0163494
32332	1741	ML	7954012	LOH12CR1: loss of heterozygosity, 12, chromosomal region 1		-3.93414	0.00199601	0.0213908	0.035321	1	1	1	1.01013	3.0671	0.00295127	3.09817	0.0133553
31916	2574	ML	7942717	MYO7A: myosin VIIA		-3.35835	0.00199601	0.0213908	0.035321	1	1	1	1.01013	2.93563	0.00526245	2.96537	0.0144036
31562	3270	ML	8169580	IL13RA1: interleukin 13 receptor, alpha 1		-3.015	0.00199601	0.0213908	0.035321	1	1	1	1.01013	3.29137	0.00850078	3.3247	0.017159
31635	3128	ML	8014825	FBXL20: F-box and leucine-rich repeat protein 20		-3.08195	0.00199601	0.0213908	0.035321	1	1	1	1.01012	3.2077	0.0168769	3.24017	0.00693494
32697	1090	ML	8160151	ZDHHC21: zinc finger, DHHC-type containing 21		-4.62345	0.00199601	0.0213908	0.035321	1	1	1	1.01011	3.24907	0.00475219	3.2819	0.011345
33152	238	ML	8125295	ATF6B: activating transcription factor 6 beta		-7.4675	0.00199601	0.0213908	0.035321	1	1	1	1.0101	3.26807	0.00700309	3.30107	0.00308923
32864	763	ML	8052934	MCEE: methylmalonyl CoA epimerase		-5.18482	0.00199601	0.0213908	0.035321	1	1	1	1.01009	2.9072	0.0095247	2.93653	0.0023029
31565	3266	ML	8044963	8044963: unannotated transcript: chr2:122409203-122409310		-3.01656	0.00199601	0.0213908	0.035321	1	1	1	1.01009	2.84207	0.0117006	2.87073	0.0115768
29908	7182	ML	7925691	ZNF124: zinc finger protein 124		-1.97475	0.00199601	0.0213908	0.035321	1	1	1	1.01008	3.18583	0.0267844	3.21793	0.00867717
31482	3447	ML	8007312	TUBG2: tubulin, gamma 2		-2.93785	0.00199601	0.0213908	0.035321	1	1	1	1.01006	3.18057	0.0187777	3.21257	0.001823
31147	4203	ML	7943795	C11orf52: chromosome 11 open reading frame 52		-2.68062	0.00199601	0.0213908	0.035321	1	1	1	1.01005	3.1424	0.00882553	3.17397	0.0183881
32713	1056	ML	8071466	LZTR1: leucine-zipper-like transcription regulator 1		-4.66795	0.00199601	0.0213908	0.035321	1	1	1	1.01004	3.2257	0.00590254	3.2581	0.0104733
29914	7167	ML	7960764	RBP5: retinol binding protein 5, cellular		-1.97687	0.00199601	0.0213908	0.035321	1	1	1	1.01004	2.9671	0.0242594	2.9969	0.0096535
31141	4217	ML	8113120	TOB2: transducer of ERBB2, 2		-2.67838	0.00199601	0.0213908	0.035321	1	1	1	1.01004	3.2474	0.0147421	3.28	0.0150702
31142	4216	ML	8165707	NC_001807: gi|17981852|ref|NC_001807.4|:c14743-14675; gene=TRNE; product=tRNA-Glu		-2.67838	0.00199601	0.0213908	0.035321	1	1	1	1.01004	3.2474	0.0147421	3.28	0.0150702
33149	242	ML	8178727	ATF6B: activating transcription factor 6 beta		-7.43662	0.00199601	0.0213908	0.035321	1	1	1	1.01004	3.2617	0.00721318	3.29443	0.00246847
31863	2669	ML	7898115	TMEM51: transmembrane protein 51		-3.30346	0.00199601	0.0213908	0.035321	1	1	1	1.01003	3.03517	0.0114849	3.0656	0.0110775
31778	2853	ML	8100362	LNX1: ligand of numb-protein X 1, E3 ubiquitin protein ligase		-3.2048	0.00199601	0.0213908	0.035321	1	1	1	1.01002	2.9065	0.0146666	2.93563	0.00572742
30851	4903	ML	7925442	ENST00000475755: ncrna_pseudogene:Mt_tRNA_pseudogene chromosome:GRCh37:1:238109616:238109687:-1 gene:ENSG00000242235 gene_biotype:Mt_tRNA_pseudogene transcript_biotype:Mt_tRNA_pseudogene		-2.46923	0.00199601	0.0213908	0.035321	1	1	1	1.01001	2.55147	0.00427239	2.577	0.0173934
32539	1365	ML	7904755	PEX11B: peroxisomal biogenesis factor 11 beta		-4.26672	0.00199601	0.0213908	0.035321	1	1	1	1.01	3.31037	0.0133058	3.34347	0.00187172
30226	6380	ML	8161727	FAM108B1: family with sequence similarity 108, member B1		-2.12152	0.00199601	0.0213908	0.035321	1	1	1	1.00999	3.29713	0.00321921	3.33007	0.0266941
32440	1564	ML	8078991	ZNF619: zinc finger protein 619		-4.07899	0.00199601	0.0213908	0.035321	1	1	1	1.00998	2.9816	0.0110775	3.01137	0.00608714
32111	2178	ML	8150036	KIF13B: kinesin family member 13B		-3.59296	0.00199601	0.0213908	0.035321	1	1	1	1.00998	3.1161	0.013095	3.1472	0.0073
31847	2695	ML	8123658	SLC22A23: solute carrier family 22, member 23		-3.28977	0.00199601	0.0213908	0.035321	1	1	1	1.00998	3.1699	0.0024	3.20153	0.016481
32152	2093	ML	8126259	C6orf130: chromosome 6 open reading frame 130		-3.64532	0.00199601	0.0213908	0.035321	1	1	1	1.00998	3.2681	0.0146523	3.3007	0.00502394
29793	7416	ML	8038760	KLK13: kallikrein-related peptidase 13		-1.93315	0.00199601	0.0213908	0.035321	1	1	1	1.00996	2.96247	0.0136749	2.99197	0.0226187
32726	1020	ML	8010086	METTL23: methyltransferase like 23		-4.72381	0.00199601	0.0213908	0.035321	1	1	1	1.00995	3.2758	0.0116297	3.3084	0.00276225
31787	2842	ML	8161362	KGFLP1: fibroblast growth factor 7 pseudogene		-3.20856	0.00199601	0.0213908	0.035321	1	1	1	1.00995	2.82053	0.00284312	2.8486	0.0148819
30934	4695	ML	7895019	7895019: unannotated transcript: ---:-------		-2.52991	0.00199601	0.0213908	0.035321	1	1	1	1.00995	3.24763	0.0127249	3.27993	0.0180854
31906	2599	ML	7922889	IVNS1ABP: influenza virus NS1A binding protein		-3.33856	0.00199601	0.0213908	0.035321	1	1	1	1.00994	3.49037	0.0149246	3.52507	0.0100669
32328	1753	ML	7932703	ACBD5: acyl-CoA binding domain containing 5		-3.91736	0.00199601	0.0213908	0.035321	1	1	1	1.00994	3.11517	0.0121558	3.14613	0.00630106
30047	6861	ML	7961142	OLR1: oxidized low density lipoprotein (lectin-like) receptor 1		-2.02614	0.00199601	0.0213908	0.035321	1	1	1	1.00993	2.29503	0.0176817	2.31783	0.0082002
30852	4901	ML	7894224	7894224: unannotated transcript: ---:-------		-2.46943	0.00199601	0.0213908	0.035321	1	1	1	1.00993	3.00977	0.00657673	3.03967	0.0199139
30963	4627	ML	8043131	ELMOD3: ELMO/CED-12 domain containing 3		-2.55286	0.00199601	0.0213908	0.035321	1	1	1	1.00993	2.94697	0.0118938	2.97623	0.0159004
31621	3157	ML	7976154	ENST00000364157: ncrna:misc_RNA chromosome:GRCh37:14:90088262:90088551:1 gene:ENSG00000201027 gene_biotype:misc_RNA transcript_biotype:misc_RNA		-3.06578	0.00199601	0.0213908	0.035321	1	1	1	1.00993	2.776	0.011353	2.80357	0.0106613
30936	4692	ML	8111552	NADKD1: NAD kinase domain containing 1		-2.53121	0.00199601	0.0213908	0.035321	1	1	1	1.00992	3.1375	0.0155888	3.16863	0.0145204
33063	385	ML	8053801	ANKRD36C: ankyrin repeat domain 36C		-6.49865	0.00199601	0.0213908	0.035321	1	1	1	1.00992	3.2027	0.00825045	3.23447	0.00190088
32460	1528	ML	7924180	C1orf227: chromosome 1 open reading frame 227		-4.12389	0.00199601	0.0213908	0.035321	1	1	1	1.00991	2.36363	0.00845596	2.38707	0.0050362
30917	4730	ML	8044346	LOC151009: uncharacterized LOC151009		-2.51732	0.00199601	0.0213908	0.035321	1	1	1	1.00991	3.00253	0.0129732	3.0323	0.0158483
30885	4816	ML	8081171	CRYBG3: beta-gamma crystallin domain containing 3		-2.49027	0.00199601	0.0213908	0.035321	1	1	1	1.00991	3.13773	0.0107039	3.16883	0.0187969
31308	3850	ML	8134117	FZD1: frizzled family receptor 1		-2.79037	0.00199601	0.0213908	0.035321	1	1	1	1.0099	2.92803	0.0132493	2.95703	0.0121858
31822	2744	ML	8146225	C8orf40: chromosome 8 open reading frame 40		-3.26036	0.00199601	0.0213908	0.035321	1	1	1	1.00989	3.3806	0.00831625	3.41403	0.0156941
33049	406	ML	7901696	PCSK9: proprotein convertase subtilisin/kexin type 9		-6.35301	0.00199601	0.0213908	0.035321	1	1	1	1.00988	3.23063	0.00710657	3.26257	0.00502925
31196	4103	ML	7940891	DNAJC4: DnaJ (Hsp40) homolog, subfamily C, member 4		-2.70866	0.00199601	0.0213908	0.035321	1	1	1	1.00988	3.0609	0.0143259	3.09113	0.0129817
31980	2423	ML	7993776	LOC81691: exonuclease NEF-sp		-3.43616	0.00199601	0.0213908	0.035321	1	1	1	1.00988	2.99687	0.0111433	3.02647	0.00992186
32119	2160	ML	8144420	LOC349196: uncharacterized LOC349196		-3.60494	0.00199601	0.0213908	0.035321	1	1	1	1.00986	2.94657	0.0120504	2.97563	0.00705856
32120	2159	ML	8144494	LOC349196: uncharacterized LOC349196		-3.60494	0.00199601	0.0213908	0.035321	1	1	1	1.00986	2.94657	0.0120504	2.97563	0.00705856
30837	4926	ML	8068254	IL10RB: interleukin 10 receptor, beta		-2.46177	0.00199601	0.0213908	0.035321	1	1	1	1.00986	2.99863	0.0179573	3.0282	0.0105014
31975	2436	ML	8151952	NIPAL2: NIPA-like domain containing 2		-3.42854	0.00199601	0.0213908	0.035321	1	1	1	1.00986	3.02713	0.00165025	3.05697	0.0149808
31325	3808	ML	7972003	KLF12: Kruppel-like factor 12		-2.80049	0.00199601	0.0213908	0.035321	1	1	1	1.00984	3.20713	0.0194793	3.2387	0.00131149
30421	5910	ML	8170286	ENST00000365603: ncrna:misc_RNA chromosome:GRCh37:X:142178133:142178463:1 gene:ENSG00000202473 gene_biotype:misc_RNA transcript_biotype:misc_RNA		-2.22406	0.00199601	0.0213908	0.035321	1	1	1	1.00984	2.3169	0.0154182	2.3397	0.00880682
30806	5005	ML	8001946	KIAA0895L: KIAA0895-like		-2.43831	0.00199601	0.0213908	0.035321	1	1	1	1.00982	3.20867	0.0192656	3.24017	0.0113808
32335	1737	ML	7958960	TPCN1: two pore segment channel 1		-3.93921	0.00199601	0.0213908	0.035321	1	1	1	1.00982	3.17857	0.0096241	3.20977	0.00977616
32574	1298	ML	7991904	PIGQ: phosphatidylinositol glycan anchor biosynthesis, class Q		-4.34831	0.00199601	0.0213908	0.035321	1	1	1	1.00981	3.1677	0.00348712	3.19877	0.0118732
32133	2129	ML	7933228	MARCH8: membrane-associated ring finger (C3HC4) 8, E3 ubiquitin protein ligase		-3.62024	0.00199601	0.0213908	0.035321	1	1	1	1.0098	3.3453	0.0137655	3.3781	0.00753459
33046	411	ML	8175121	IGSF1: immunoglobulin superfamily, member 1		-6.32877	0.00199601	0.0213908	0.035321	1	1	1	1.0098	3.18613	0.00291947	3.21737	0.00803389
33067	379	ML	8084219	KLHL24: kelch-like 24 (Drosophila)		-6.52707	0.00199601	0.0213908	0.035321	1	1	1	1.0098	3.29657	0.0077106	3.32887	0.00374344
28549	10488	ML	8081758	GRAMD1C: GRAM domain containing 1C		-1.51668	0.00199601	0.0213908	0.035321	1	1	1	1.0098	2.88917	0.031328	2.91747	0.00794061
30749	5148	ML	8111788	TTC33: tetratricopeptide repeat domain 33		-2.4036	0.00199601	0.0213908	0.035321	1	1	1	1.00979	3.0273	0.0153307	3.05693	0.0148648
31766	2877	ML	8031843	LOC100128398: uncharacterized LOC100128398		-3.19363	0.00199601	0.0213908	0.035321	1	1	1	1.00978	3.0306	0.00846581	3.06023	0.013661
32408	1626	ML	8180246	NM_001039798.1: Homo sapiens hypothetical protein LOC650346 (FLJ39257), mRNA.		-4.03387	0.00199601	0.0213908	0.035321	1	1	1	1.00978	3.16397	0.00261598	3.1949	0.0130219
32387	1650	ML	7893841	7893841: unannotated transcript: ---:-------		-4.01422	0.00199601	0.0213908	0.035321	1	1	1	1.00978	3.14017	0.00903401	3.17087	0.00968779
31620	3161	ML	8154333	KDM4C: lysine (K)-specific demethylase 4C		-3.06354	0.00199601	0.0213908	0.035321	1	1	1	1.00977	3.15817	0.00835005	3.18903	0.0153239
32549	1346	ML	8102518	C4orf3: chromosome 4 open reading frame 3		-4.29032	0.00199601	0.0213908	0.035321	1	1	1	1.00977	3.1423	0.0112947	3.173	0.00510294
32462	1522	ML	8118915	ZNF76: zinc finger protein 76		-4.12751	0.00199601	0.0213908	0.035321	1	1	1	1.00977	3.1838	0.0114241	3.2149	0.00630952
30144	6619	ML	7916584	TACSTD2: tumor-associated calcium signal transducer 2		-2.07361	0.00199601	0.0213908	0.035321	1	1	1	1.00976	2.77943	0.00450037	2.80657	0.0222127
32465	1518	ML	8125017	ABHD16A: abhydrolase domain containing 16A		-4.13505	0.00199601	0.0213908	0.035321	1	1	1	1.00973	3.14493	0.0121253	3.17553	0.00415492
33012	475	ML	8113790	MARCH3: membrane-associated ring finger (C3HC4) 3, E3 ubiquitin protein ligase		-6.05969	0.00199601	0.0213908	0.035321	1	1	1	1.00971	3.26127	0.00604676	3.29293	0.00673523
32132	2130	ML	8161026	C9orf100: chromosome 9 open reading frame 100		-3.6198	0.00199601	0.0213908	0.035321	1	1	1	1.00971	3.19013	0.0138218	3.2211	0.00533948
32386	1653	ML	8021275	POLI: polymerase (DNA directed) iota		-4.01165	0.00199601	0.0213908	0.035321	1	1	1	1.0097	3.40517	0.00523673	3.4382	0.0132661
32657	1148	ML	8086185	PLCD1: phospholipase C, delta 1		-4.53636	0.00199601	0.0213908	0.035321	1	1	1	1.0097	3.11747	0.0073867	3.1477	0.00887074
32533	1377	ML	8107942	RAD50: RAD50 homolog (S. cerevisiae)		-4.25805	0.00199601	0.0213908	0.035321	1	1	1	1.00969	3.30483	0.011012	3.33687	0.00696587
33024	450	ML	8156228	CTSL1: cathepsin L1		-6.14075	0.00199601	0.0213908	0.035321	1	1	1	1.00969	3.2414	0.00558659	3.2728	0.00687241
30770	5088	ML	7954559	PPFIBP1: PTPRF interacting protein, binding protein 1 (liprin beta 1)		-2.41724	0.00199601	0.0213908	0.035321	1	1	1	1.00966	3.08353	0.0183764	3.11333	0.0108744
31241	3998	ML	7901460	GPX7: glutathione peroxidase 7		-2.73894	0.00199601	0.0213908	0.035321	1	1	1	1.00966	3.28413	0.017546	3.31587	0.00973875
30986	4580	ML	8033987	ICAM3: intercellular adhesion molecule 3		-2.56604	0.00199601	0.0213908	0.035321	1	1	1	1.00966	3.19313	0.018205	3.22397	0.0100858
32801	885	ML	8037205	CEACAM1: carcinoembryonic antigen-related cell adhesion molecule 1 (biliary glycoprotein)		-4.94931	0.00199601	0.0213908	0.035321	1	1	1	1.00965	2.81377	0.00854069	2.84093	0.00417652
30199	6459	ML	8156873	INVS: inversin		-2.10364	0.00199601	0.0213908	0.035321	1	1	1	1.00965	3.09243	0.0229313	3.12227	0.00880473
32740	995	ML	7958895	OAS3: 2'-5'-oligoadenylate synthetase 3, 100kDa		-4.76188	0.00199601	0.0213908	0.035321	1	1	1	1.00963	2.9617	0.00835404	2.99023	0.00615819
32747	985	ML	7980403	C14orf133: chromosome 14 open reading frame 133		-4.7837	0.00199601	0.0213908	0.035321	1	1	1	1.00963	3.27363	0.00474377	3.30517	0.0103852
30155	6581	ML	7899955	ENST00000364998: ncrna:misc_RNA chromosome:GRCh37:1:35661570:35661663:1 gene:ENSG00000201868 gene_biotype:misc_RNA transcript_biotype:misc_RNA		-2.07988	0.00199601	0.0213908	0.035321	1	1	1	1.00963	3.42443	0.0128461	3.4574	0.0242625
32677	1120	ML	8051135	IFT172: intraflagellar transport 172 homolog (Chlamydomonas)		-4.58429	0.00199601	0.0213908	0.035321	1	1	1	1.00963	3.00237	0.00864311	3.03127	0.00667258
32712	1057	ML	8100870	ADAMTS3: ADAM metallopeptidase with thrombospondin type 1 motif, 3		-4.66724	0.00199601	0.0213908	0.035321	1	1	1	1.00961	3.04473	0.0066335	3.074	0.0086
31940	2522	ML	8153175	TRAPPC9: trafficking protein particle complex 9		-3.3872	0.00199601	0.0213908	0.035321	1	1	1	1.0096	3.2594	0.0144042	3.2907	0.00697782
32720	1035	ML	8094251	FLJ39653: uncharacterized FLJ39653		-4.69785	0.00199601	0.0213908	0.035321	1	1	1	1.00958	3.09443	0.0102403	3.12407	0.00380832
31316	3831	ML	7968911	7968911: unannotated transcript: chr13:45576285-45576582		-2.79497	0.00199601	0.0213908	0.035321	1	1	1	1.00957	2.89837	0.0155593	2.9261	0.00729932
30445	5859	ML	7952986	WNK1: WNK lysine deficient protein kinase 1		-2.23639	0.00199601	0.0213908	0.035321	1	1	1	1.00956	3.09893	0.0174592	3.12857	0.0148964
32346	1712	ML	8178561	ABHD16A: abhydrolase domain containing 16A		-3.96129	0.00199601	0.0213908	0.035321	1	1	1	1.00956	3.15193	0.0122075	3.18207	0.00495715
30893	4791	ML	8059902	LOC93463: uncharacterized LOC93463		-2.49882	0.00199601	0.0213908	0.035321	1	1	1	1.00955	2.75623	0.00757386	2.78257	0.0166073
31358	3725	ML	8046048	CSRNP3: cysteine-serine-rich nuclear protein 3		-2.82883	0.00199601	0.0213908	0.035321	1	1	1	1.00955	3.0223	0.0127189	3.05117	0.0122729
31079	4358	ML	8168855	ARMCX4: armadillo repeat containing, X-linked 4		-2.63084	0.00199601	0.0213908	0.035321	1	1	1	1.00954	3.00113	0.0185775	3.02977	0.00320052
32496	1442	ML	8081667	SLC35A5: solute carrier family 35, member A5		-4.2056	0.00199601	0.0213908	0.035321	1	1	1	1.00954	3.40713	0.00568712	3.43963	0.0121167
31613	3174	ML	8004955	SHISA6: shisa homolog 6 (Xenopus laevis)		-3.0555	0.00199601	0.0213908	0.035321	1	1	1	1.00954	2.98177	0.00683032	3.0102	0.014599
31883	2637	ML	7987192	SLC12A6: solute carrier family 12 (potassium/chloride transporters), member 6		-3.3198	0.00199601	0.0213908	0.035321	1	1	1	1.00953	3.2046	0.014698	3.23513	0.00614356
31442	3523	ML	8067869	RBM11: RNA binding motif protein 11		-2.90699	0.00199601	0.0213908	0.035321	1	1	1	1.00952	2.89097	0.00737857	2.9185	0.014652
32636	1188	ML	7952675	ZNF123P: zinc finger protein 123, pseudogene		-4.48463	0.00199601	0.0213908	0.035321	1	1	1	1.0095	2.53923	0.00245425	2.56337	0.00899185
32385	1654	ML	7975799	FLVCR2: feline leukemia virus subgroup C cellular receptor family, member 2		-4.01104	0.00199601	0.0213908	0.035321	1	1	1	1.00949	3.1868	0.0126123	3.21703	0.00337244
29659	7753	ML	8087547	GENSCAN00000020110: cdna:genscan chromosome:GRCh37:3:49896751:49941042:-1 transcript_biotype:protein_coding		-1.8784	0.00199601	0.0213908	0.035321	1	1	1	1.00948	2.88587	0.0233778	2.91323	0.00950018
30340	6084	ML	7970887	ZAR1L: zygote arrest 1-like		-2.19135	0.00199601	0.0213908	0.035321	1	1	1	1.00948	2.4014	0.00461628	2.42417	0.0173926
29808	7384	ML	8117667	ZNF187: zinc finger protein 187		-1.93822	0.00199601	0.0213908	0.035321	1	1	1	1.00948	2.95727	0.0216264	2.9853	0.012644
32018	2354	ML	8076113	FAM227A: family with sequence similarity 227, member A		-3.47893	0.00199601	0.0213908	0.035321	1	1	1	1.00947	3.13623	0.0144535	3.16593	0.00312143
33171	206	ML	8169009	BEX4: brain expressed, X-linked 4		-7.78098	0.00199601	0.0213908	0.035321	1	1	1	1.00947	3.51767	0.00495412	3.55097	0.00551392
31712	2977	ML	8126760	RCAN2: regulator of calcineurin 2		-3.1466	0.00199601	0.0213908	0.035321	1	1	1	1.00946	3.23707	0.0106157	3.2677	0.0131011
32073	2251	ML	8094638	WDR19: WD repeat domain 19		-3.54368	0.00199601	0.0213908	0.035321	1	1	1	1.00945	3.13877	0.0132005	3.16843	0.00600028
32973	557	ML	8154043	DMRT3: doublesex and mab-3 related transcription factor 3		-5.78213	0.00199601	0.0213908	0.035321	1	1	1	1.00945	2.7349	0.00696563	2.76073	0.00337095
31382	3678	ML	7946365	STK33: serine/threonine kinase 33		-2.847	0.00199601	0.0213908	0.035321	1	1	1	1.00944	3.03927	0.0162004	3.06797	0.00651255
31836	2718	ML	7970031	RN7SKP10: RNA, 7SK small nuclear pseudogene 10		-3.27941	0.00199601	0.0213908	0.035321	1	1	1	1.00944	2.60193	0.01185	2.6265	0.00528488
31111	4290	ML	8100456	ENST00000411373: ncrna:misc_RNA chromosome:GRCh37:4:56406669:56407002:-1 gene:ENSG00000223305 gene_biotype:misc_RNA transcript_biotype:misc_RNA		-2.65128	0.00199601	0.0213908	0.035321	1	1	1	1.00944	3.04763	0.00715844	3.0764	0.0173761
32046	2294	ML	8162610	CDC14B: CDC14 cell division cycle 14 homolog B (S. cerevisiae)		-3.51384	0.00199601	0.0213908	0.035321	1	1	1	1.00942	3.29107	0.0129218	3.32207	0.00815618
31839	2713	ML	7958913	OAS2: 2'-5'-oligoadenylate synthetase 2, 69/71kDa		-3.28237	0.00199601	0.0213908	0.035321	1	1	1	1.0094	2.55197	0.00971099	2.57597	0.00812917
32603	1237	ML	8131326	SLC29A4: solute carrier family 29 (nucleoside transporters), member 4		-4.43536	0.00199601	0.0213908	0.035321	1	1	1	1.0094	3.1533	0.00881533	3.18293	0.00749689
32819	840	ML	7982812	ZFYVE19: zinc finger, FYVE domain containing 19		-5.04392	0.00199601	0.0213908	0.035321	1	1	1	1.0094	3.05123	0.00767746	3.0799	0.00616117
31170	4167	ML	8177834	ATAT1: alpha tubulin acetyltransferase 1		-2.69085	0.00199601	0.0213908	0.035321	1	1	1	1.00939	3.07087	0.0142043	3.0997	0.0119453
32744	989	ML	7938301	AKIP1: A kinase (PRKA) interacting protein 1		-4.77487	0.00199601	0.0213908	0.035321	1	1	1	1.00938	3.12947	0.00750822	3.15883	0.00755667
31459	3491	ML	8085852	NGLY1: N-glycanase 1		-2.91661	0.00199601	0.0213908	0.035321	1	1	1	1.00938	3.233	0.017872	3.26333	0.00225462
33256	82	ML	7986701	HERC2P2: hect domain and RLD 2 pseudogene 2		-9.59576	0.00199601	0.0213908	0.035321	1	1	1	1.00938	3.4077	0.00575587	3.43967	0.000404145
31075	4369	ML	8026751	FAM125A: family with sequence similarity 125, member A		-2.62837	0.00199601	0.0213908	0.035321	1	1	1	1.00937	3.18657	0.0191891	3.21643	0.00437531
32839	807	ML	8126452	PEX6: peroxisomal biogenesis factor 6		-5.10907	0.00199601	0.0213908	0.035321	1	1	1	1.00937	3.08837	0.00317857	3.1173	0.00927955
31758	2895	ML	8128939	TRAF3IP2: TRAF3 interacting protein 2		-3.18764	0.00199601	0.0213908	0.035321	1	1	1	1.00937	3.17823	0.0126382	3.208	0.0100936
31735	2934	ML	8119722	CUL9: cullin 9		-3.16648	0.00199601	0.0213908	0.035321	1	1	1	1.00936	3.05077	0.0119926	3.07933	0.0100172
29433	8373	ML	8090511	LOC100132731: uncharacterized LOC100132731		-1.78874	0.00199601	0.0213908	0.035321	1	1	1	1.00936	2.67477	0.0169842	2.6998	0.0172948
31213	4066	ML	8009746	SLC16A5: solute carrier family 16, member 5 (monocarboxylic acid transporter 6)		-2.71763	0.00199601	0.0213908	0.035321	1	1	1	1.00935	3.13157	0.0136097	3.16083	0.0127555
32661	1144	ML	7937150	ADAM8: ADAM metallopeptidase domain 8		-4.54815	0.00199601	0.0213908	0.035321	1	1	1	1.00933	2.97263	0.0104987	3.00037	0.00115036
30759	5115	ML	8128977	TUBE1: tubulin, epsilon 1		-2.41106	0.00199601	0.0213908	0.035321	1	1	1	1.00933	3.02357	0.00420634	3.05177	0.0198167
32488	1470	ML	8094169	CPEB2: cytoplasmic polyadenylation element binding protein 2		-4.1752	0.00199601	0.0213908	0.035321	1	1	1	1.00932	2.75853	0.00959184	2.78423	0.00465439
31036	4470	ML	8105899	MARVELD2: MARVEL domain containing 2		-2.60031	0.00199601	0.0213908	0.035321	1	1	1	1.00931	3.2698	0.0198713	3.30023	0.00400791
31037	4471	ML	8177498	MARVELD2: MARVEL domain containing 2		-2.60031	0.00199601	0.0213908	0.035321	1	1	1	1.00931	3.2698	0.0198713	3.30023	0.00400791
30975	4599	ML	7956038	TMEM198B: transmembrane protein 198B, pseudogene		-2.5608	0.00199601	0.0213908	0.035321	1	1	1	1.00931	3.19177	0.0129187	3.22147	0.0153832
30493	5737	ML	7917199	TTLL7: tubulin tyrosine ligase-like family, member 7		-2.2613	0.00199601	0.0213908	0.035321	1	1	1	1.0093	2.86293	0.00980527	2.88957	0.0178889
32319	1768	ML	7990714	CHRNA3: cholinergic receptor, nicotinic, alpha 3 (neuronal)		-3.90323	0.00199601	0.0213908	0.035321	1	1	1	1.0093	2.8393	0.0116323	2.8657	0.00138924
33283	20	ML	8005959	NEK8: NIMA (never in mitosis gene a)- related kinase 8		-13.0701	0.00199601	0.0213908	0.035321	1	1	1	1.00929	3.12417	0.00221886	3.1532	0.00314325
32204	1980	ML	7949746	POLD4: polymerase (DNA-directed), delta 4, accessory subunit		-3.72884	0.00199601	0.0213908	0.035321	1	1	1	1.00928	3.16323	0.00878996	3.1926	0.0104312
30730	5198	ML	8160771	KIF24: kinesin family member 24		-2.39156	0.00199601	0.0213908	0.035321	1	1	1	1.00928	2.95157	0.0061825	2.97897	0.0188564
31513	3363	ML	8137639	WDR60: WD repeat domain 60		-2.97279	0.00199601	0.0213908	0.035321	1	1	1	1.00927	3.04763	0.0149246	3.0759	0.00696348
33206	157	ML	8180418	NM_001040145.1: Homo sapiens chromosome transmission fidelity factor 8 homolog (S. cerevisiae) (CTF8), transcript variant 3, mRNA		-8.27502	0.00199601	0.0213908	0.035321	1	1	1	1.00927	3.47943	0.00524817	3.5117	0.00425088
32269	1866	ML	8102817	ELF2: E74-like factor 2 (ets domain transcription factor)		-3.81731	0.00199601	0.0213908	0.035321	1	1	1	1.00925	3.22033	0.00770216	3.25013	0.0111132
31204	4082	ML	8076644	SULT4A1: sulfotransferase family 4A, member 1		-2.71325	0.00199601	0.0213908	0.035321	1	1	1	1.00925	2.99777	0.00470779	3.0255	0.0170666
31769	2870	ML	7900009	EIF2C4: eukaryotic translation initiation factor 2C, 4		-3.19704	0.00199601	0.0213908	0.035321	1	1	1	1.00924	3.1827	0.00459674	3.2121	0.0152502
30064	6823	ML	8056710	C2orf77: chromosome 2 open reading frame 77		-2.0329	0.00199601	0.0213908	0.035321	1	1	1	1.00924	2.10033	0.00723901	2.11973	0.0148595
32704	1080	ML	7946340	RIC3: resistance to inhibitors of cholinesterase 3 homolog (C. elegans)		-4.64375	0.00199601	0.0213908	0.035321	1	1	1	1.00922	2.9848	0.00183576	3.01233	0.0101041
30826	4951	ML	8048772	RHBDD1: rhomboid domain containing 1		-2.45534	0.00199601	0.0213908	0.035321	1	1	1	1.00922	3.34597	0.02005	3.3768	0.0084309
31745	2916	ML	7908543	NEK7: NIMA (never in mitosis gene a)-related kinase 7		-3.17764	0.00199601	0.0213908	0.035321	1	1	1	1.00921	3.18447	0.01115	3.2138	0.0114595
31476	3459	ML	7997152	CHST4: carbohydrate (N-acetylglucosamine 6-O) sulfotransferase 4		-2.93454	0.00199601	0.0213908	0.035321	1	1	1	1.0092	3.0369	0.00212838	3.06483	0.0163491
30821	4957	ML	8070489	RIPK4: receptor-interacting serine-threonine kinase 4		-2.45314	0.00199601	0.0213908	0.035321	1	1	1	1.00919	3.02297	0.00386307	3.05073	0.0192204
32107	2190	ML	7907690	TOR3A: torsin family 3, member A		-3.58344	0.00199601	0.0213908	0.035321	1	1	1	1.00918	3.14703	0.00910293	3.17593	0.0105954
30983	4584	ML	8015685	EZH1: enhancer of zeste homolog 1 (Drosophila)		-2.56481	0.00199601	0.0213908	0.035321	1	1	1	1.00918	3.14843	0.0150706	3.17733	0.0124005
33087	345	ML	8116534	TRIM52: tripartite motif containing 52		-6.69537	0.00199601	0.0213908	0.035321	1	1	1	1.00917	2.97683	0.0061655	3.00413	0.00344432
31272	3925	ML	8029423	ZNF233: zinc finger protein 233		-2.76344	0.00199601	0.0213908	0.035321	1	1	1	1.00917	2.7299	0.0133372	2.75493	0.00826458
29499	8181	ML	8066962	ENST00000459122: ncrna:snoRNA chromosome:GRCh37:20:48556833:48556937:-1 gene:ENSG00000239157 gene_biotype:snoRNA transcript_biotype:snoRNA		-1.81801	0.00199601	0.0213908	0.035321	1	1	1	1.00916	2.7219	0.0236502	2.74683	0.00222336
30214	6425	ML	7985147	DNAJA4: DnaJ (Hsp40) homolog, subfamily A, member 4		-2.11113	0.00199601	0.0213908	0.035321	1	1	1	1.00915	2.95587	0.00438444	2.9829	0.0217414
31856	2679	ML	7906223	RRNAD1: ribosomal RNA adenine dimethylase domain containing 1		-3.29967	0.00199601	0.0213908	0.035321	1	1	1	1.00914	3.17203	0.0116414	3.20103	0.00980833
30720	5215	ML	7970999	SPG20: spastic paraplegia 20 (Troyer syndrome)		-2.38662	0.00199601	0.0213908	0.035321	1	1	1	1.00914	3.32587	0.0210811	3.35627	0.00650641
31632	3132	ML	8105585	RNF180: ring finger protein 180		-3.07928	0.00199601	0.0213908	0.035321	1	1	1	1.00914	3.0491	0.0149412	3.07697	0.00473849
31227	4026	ML	8180240	NM_001039766.1: Homo sapiens FLJ44451 fis (FLJ44451), mRNA.		-2.72669	0.00199601	0.0213908	0.035321	1	1	1	1.00913	2.93143	0.0156366	2.9582	0.00667757
32866	758	ML	7915846	MKNK1: MAP kinase interacting serine/threonine kinase 1		-5.1918	0.00199601	0.0213908	0.035321	1	1	1	1.00912	3.33153	0.00695797	3.36193	0.00737857
32265	1873	ML	7909545	TRAF5: TNF receptor-associated factor 5		-3.81052	0.00199601	0.0213908	0.035321	1	1	1	1.00912	3.08807	0.0099631	3.11623	0.00804073
31437	3541	ML	8123644	TUBB2A: tubulin, beta 2A class IIa		-2.9011	0.00199601	0.0213908	0.035321	1	1	1	1.00912	3.5288	0.0133518	3.56097	0.0138037
31549	3295	ML	8062890	PABPC1L: poly(A) binding protein, cytoplasmic 1-like		-3.00448	0.00199601	0.0213908	0.035321	1	1	1	1.00912	3.11203	0.0138424	3.1404	0.00870689
30263	6282	ML	7920697	GBA: glucosidase, beta, acid		-2.14328	0.00199601	0.0213908	0.035321	1	1	1	1.0091	3.08747	0.00682447	3.11557	0.0216588
32820	839	ML	7945344	LOC729737: uncharacterized LOC729737		-5.04442	0.00199601	0.0213908	0.035321	1	1	1	1.0091	3.2857	0.00636632	3.3156	0.00805419
32479	1484	ML	8043697	ANKRD36: ankyrin repeat domain 36		-4.16149	0.00199601	0.0213908	0.035321	1	1	1	1.00909	3.22277	0.00597857	3.25207	0.0106289
32529	1390	ML	7974542	C14orf101: chromosome 14 open reading frame 101		-4.2469	0.00199601	0.0213908	0.035321	1	1	1	1.00908	3.29977	0.00599361	3.32973	0.010651
30979	4590	ML	7983811	PIGB: phosphatidylinositol glycan anchor biosynthesis, class B		-2.56227	0.00199601	0.0213908	0.035321	1	1	1	1.00907	3.18037	0.0153419	3.2092	0.0120216
31554	3284	ML	8095760	THAP6: THAP domain containing 6		-3.00994	0.00199601	0.0213908	0.035321	1	1	1	1.00906	3.0755	0.0120237	3.10337	0.0106101
30227	6377	ML	7894599	7894599: unannotated transcript: ---:-------		-2.12201	0.00199601	0.0213908	0.035321	1	1	1	1.00906	3.41843	0.0229426	3.4494	0.0106071
30336	6097	ML	8097096	ENST00000475014: ncrna_pseudogene:rRNA_pseudogene chromosome:GRCh37:4:120158523:120158690:1 gene:ENSG00000244683 gene_biotype:rRNA_pseudogene transcript_biotype:rRNA_pseudogene		-2.18951	0.00199601	0.0213908	0.035321	1	1	1	1.00906	3.13557	0.0185214	3.16397	0.0127159
31682	3037	ML	8092682	SST: somatostatin		-3.12782	0.00199601	0.0213908	0.035321	1	1	1	1.00906	2.74233	0.00827667	2.76717	0.010982
29945	7095	ML	8086961	PFKFB4: 6-phosphofructo-2-kinase/fructose-2,6-biphosphatase 4		-1.98824	0.00199601	0.0213908	0.035321	1	1	1	1.00904	3.10017	0.0193314	3.1282	0.0149228
33131	268	ML	8069880	TIAM1: T-cell lymphoma invasion and metastasis 1		-7.15886	0.00199601	0.0213908	0.035321	1	1	1	1.00904	3.31607	0.00623084	3.34603	0.0037072
31783	2847	ML	8155942	FOXB2: forkhead box B2		-3.20665	0.00199601	0.0213908	0.035321	1	1	1	1.00903	3.22603	0.00760022	3.25517	0.0137791
31776	2857	ML	8097307	INTU: inturned planar cell polarity effector homolog (Drosophila)		-3.20039	0.00199601	0.0213908	0.035321	1	1	1	1.00903	3.02713	0.0139633	3.05447	0.00488399
30743	5163	ML	7979044	NIN: ninein (GSK3B interacting protein)		-2.39971	0.00199601	0.0213908	0.035321	1	1	1	1.00901	3.1425	0.0110123	3.1708	0.0172035
31411	3600	ML	7987475	PLCB2: phospholipase C, beta 2		-2.87962	0.00199601	0.0213908	0.035321	1	1	1	1.009	3.04033	0.0161772	3.0677	0.00304138
29493	8191	ML	8074769	RIMBP3: RIMS binding protein 3		-1.81633	0.00199601	0.0213908	0.035321	1	1	1	1.00898	2.57207	0.0198732	2.59517	0.00950228
32986	529	ML	7892783	7892783: unannotated transcript: ---:-------		-5.89903	0.00199601	0.0213908	0.035321	1	1	1	1.00898	3.3778	0.00445758	3.40813	0.0077106
31509	3370	ML	7967841	CHFR: checkpoint with forkhead and ring finger domains, E3 ubiquitin protein ligase		-2.96829	0.00199601	0.0213908	0.035321	1	1	1	1.00898	3.30813	0.00951438	3.33783	0.0144853
30427	5901	ML	7989365	RORA: RAR-related orphan receptor A		-2.22562	0.00199601	0.0213908	0.035321	1	1	1	1.00897	3.07647	0.0159817	3.10407	0.0143507
33259	74	ML	8125649	VPS52: vacuolar protein sorting 52 homolog (S. cerevisiae)		-9.71679	0.00199601	0.0213908	0.035321	1	1	1	1.00896	3.34463	0.00115036	3.3746	0.00521632
33260	75	ML	8178917	VPS52: vacuolar protein sorting 52 homolog (S. cerevisiae)		-9.71679	0.00199601	0.0213908	0.035321	1	1	1	1.00896	3.34463	0.00115036	3.3746	0.00521632
30812	4986	ML	7896300	7896300: unannotated transcript: ---:-------		-2.44266	0.00199601	0.0213908	0.035321	1	1	1	1.00894	3.15513	0.00241316	3.18333	0.01985
32665	1136	ML	8002381	COG4: component of oligomeric golgi complex 4		-4.55561	0.00199601	0.0213908	0.035321	1	1	1	1.00894	3.36427	0.0110387	3.39433	0.00297041
33240	107	ML	8132988	ENST00000466728: ncrna_pseudogene:Mt_tRNA_pseudogene chromosome:GRCh37:7:57236783:57236849:1 gene:ENSG00000240543 gene_biotype:Mt_tRNA_pseudogene transcript_biotype:Mt_tRNA_pseudogene		-8.97492	0.00199601	0.0213908	0.035321	1	1	1	1.00893	1.62673	0.00191398	1.64127	0.0020502
32393	1644	ML	8168875	ARMCX3: armadillo repeat containing, X-linked 3		-4.02105	0.00199601	0.0213908	0.035321	1	1	1	1.00893	3.0163	0.00928278	3.04323	0.00695869
31641	3117	ML	8098512	TRAPPC11: trafficking protein particle complex 11		-3.08713	0.00199601	0.0213908	0.035321	1	1	1	1.00892	3.2984	0.0153245	3.32783	0.00615332
31363	3717	ML	7950885	FZD4: frizzled family receptor 4		-2.83131	0.00199601	0.0213908	0.035321	1	1	1	1.00892	3.0315	0.0106438	3.05853	0.0126571
27996	11817	ML	8129410	THEMIS: thymocyte selection associated		-1.37044	0.00199601	0.0213908	0.035321	1	1	1	1.00891	2.29253	0.00463717	2.31297	0.0254052
33199	166	ML	7896231	7896231: unannotated transcript: ---:-------		-8.12555	0.00199601	0.0213908	0.035321	1	1	1	1.00891	3.60563	0.00646942	3.63777	0.00225019
32086	2227	ML	7936134	OBFC1: oligonucleotide/oligosaccharide-binding fold containing 1		-3.55627	0.00199601	0.0213908	0.035321	1	1	1	1.0089	3.05547	0.0123973	3.08267	0.0046694
31765	2880	ML	8073068	APOBEC3C: apolipoprotein B mRNA editing enzyme, catalytic polypeptide-like 3C		-3.19327	0.00199601	0.0213908	0.035321	1	1	1	1.0089	3.3272	0.00939628	3.3568	0.0130184
28572	10445	ML	8116722	LOC100129033: QIQN5815		-1.52125	0.00199601	0.0213908	0.035321	1	1	1	1.00888	3.00043	0.00315013	3.02707	0.03016
31134	4240	ML	8155550	MGC21881: uncharacterized locus MGC21881		-2.66883	0.00199601	0.0213908	0.035321	1	1	1	1.00886	3.02553	0.0104242	3.05233	0.0139231
31651	3095	ML	8070398	LCA5L: Leber congenital amaurosis 5-like		-3.09599	0.00199601	0.0213908	0.035321	1	1	1	1.00886	2.57077	0.0119085	2.59353	0.00451811
31934	2537	ML	7943919	TTC12: tetratricopeptide repeat domain 12		-3.38128	0.00199601	0.0213908	0.035321	1	1	1	1.00885	3.05723	0.0128858	3.0843	0.00511762
31915	2575	ML	8013159	TOM1L2: target of myb1-like 2 (chicken)		-3.35807	0.00199601	0.0213908	0.035321	1	1	1	1.00885	3.11817	0.00898907	3.14577	0.0110387
33233	118	ML	7986569	HERC2P2: hect domain and RLD 2 pseudogene 2		-8.80567	0.00199601	0.0213908	0.035321	1	1	1	1.00885	3.41273	0.00592818	3.44293	0.000378594
31566	3264	ML	8179149	ATAT1: alpha tubulin acetyltransferase 1		-3.01766	0.00199601	0.0213908	0.035321	1	1	1	1.00885	3.0786	0.0120379	3.10583	0.00997112
31567	3263	ML	8117965	ATAT1: alpha tubulin acetyltransferase 1		-3.01766	0.00199601	0.0213908	0.035321	1	1	1	1.00885	3.0786	0.0120379	3.10583	0.00997112
32235	1921	ML	8070900	8070900: unannotated transcript: chr21:46764225-46771781		-3.77105	0.00199601	0.0213908	0.035321	1	1	1	1.00883	2.7595	0.00528488	2.78387	0.00986526
33191	178	ML	7948987	PLA2G16: phospholipase A2, group XVI		-7.9616	0.00199601	0.0213908	0.035321	1	1	1	1.00881	3.25493	0.00395517	3.2836	0.00482183
31178	4153	ML	8093476	8093476: unannotated transcript: chr4:1341054-1381836		-2.69434	0.00199601	0.0213908	0.035321	1	1	1	1.00881	3.0507	0.0118672	3.07757	0.0125484
31270	3927	ML	8079931	SLC38A3: solute carrier family 38, member 3		-2.76286	0.00199601	0.0213908	0.035321	1	1	1	1.00881	2.92257	0.00958245	2.9483	0.0129781
32765	954	ML	7953395	COPS7A: COP9 constitutive photomorphogenic homolog subunit 7A (Arabidopsis)		-4.82926	0.00199601	0.0213908	0.035321	1	1	1	1.0088	3.33317	0.0102065	3.3625	0.00255147
33156	229	ML	7906576	NCSTN: nicastrin		-7.52107	0.00199601	0.0213908	0.035321	1	1	1	1.00879	3.42793	0.00241937	3.45807	0.0065041
30520	5669	ML	7991153	ENST00000364121: ncrna:snoRNA chromosome:GRCh37:15:85395729:85395846:-1 gene:ENSG00000200991 gene_biotype:snoRNA transcript_biotype:snoRNA		-2.27795	0.00199601	0.0213908	0.035321	1	1	1	1.00878	2.42727	0.00110151	2.44857	0.0161581
32796	898	ML	7927231	AGAP4: ArfGAP with GTPase domain, ankyrin repeat and PH domain 4		-4.91853	0.00199601	0.0213908	0.035321	1	1	1	1.00877	3.21233	0.00878085	3.2405	0.00461303
30210	6436	ML	8023605	PIGN: phosphatidylinositol glycan anchor biosynthesis, class N		-2.10749	0.00199601	0.0213908	0.035321	1	1	1	1.00876	3.2137	0.00826136	3.24187	0.0216246
30363	6037	ML	7919761	ENST00000517238: ncrna:snoRNA chromosome:GRCh37:1:150573015:150573135:-1 gene:ENSG00000253047 gene_biotype:snoRNA transcript_biotype:snoRNA		-2.19969	0.00199601	0.0213908	0.035321	1	1	1	1.00875	3.1774	0.0200801	3.2052	0.0087155
31144	4209	ML	8031857	ZNF135: zinc finger protein 135		-2.67993	0.00199601	0.0213908	0.035321	1	1	1	1.00875	3.1625	0.0154793	3.19017	0.00895116
33277	34	ML	8180123	VPS52: vacuolar protein sorting 52 homolog (S. cerevisiae)		-11.5117	0.00199601	0.0213908	0.035321	1	1	1	1.00875	3.3571	0.00087178	3.38647	0.00433167
31240	3999	ML	7923119	ZBTB41: zinc finger and BTB domain containing 41		-2.73851	0.00199601	0.0213908	0.035321	1	1	1	1.00874	3.1609	0.0125224	3.18853	0.0121923
31224	4033	ML	8007730	ACBD4: acyl-CoA binding domain containing 4		-2.72513	0.00199601	0.0213908	0.035321	1	1	1	1.00874	3.0279	0.0111946	3.05437	0.012556
32042	2298	ML	8147040	ZBTB10: zinc finger and BTB domain containing 10		-3.5117	0.00199601	0.0213908	0.035321	1	1	1	1.00873	3.1217	0.00138564	3.14897	0.013377
31919	2568	ML	7973427	THTPA: thiamine triphosphatase		-3.36431	0.00199601	0.0213908	0.035321	1	1	1	1.00873	3.0714	0.0109124	3.0982	0.00844334
32358	1694	ML	8018982	CANT1: calcium activated nucleotidase 1		-3.97841	0.00199601	0.0213908	0.035321	1	1	1	1.00872	3.2008	0.0032909	3.2287	0.0116923
31873	2651	ML	7974146	PRPF39: PRP39 pre-mRNA processing factor 39 homolog (S. cerevisiae)		-3.31054	0.00199601	0.0213908	0.035321	1	1	1	1.00871	3.07927	0.0133238	3.1061	0.0044238
32760	964	ML	7954021	CREBL2: cAMP responsive element binding protein-like 2		-4.81907	0.00199601	0.0213908	0.035321	1	1	1	1.00869	3.26307	0.0101036	3.29143	0.00136504
31026	4488	ML	8098348	CEP44: centrosomal protein 44kDa		-2.59346	0.00199601	0.0213908	0.035321	1	1	1	1.00868	2.99	0.00405093	3.01597	0.0168622
31364	3715	ML	8114425	CDC25C: cell division cycle 25 homolog C (S. pombe)		-2.83258	0.00199601	0.0213908	0.035321	1	1	1	1.00868	3.21	0.00935361	3.23787	0.014243
33248	93	ML	8105937	SMA5: glucuronidase, beta pseudogene		-9.32188	0.00199601	0.0213908	0.035321	1	1	1	1.00868	3.36917	0.0015695	3.3984	0.0052
30659	5346	ML	7958439	USP30: ubiquitin specific peptidase 30		-2.35396	0.00199601	0.0213908	0.035321	1	1	1	1.00867	3.2227	0.0196741	3.25063	0.00594755
33268	54	ML	8022106	LINC00526: long intergenic non-protein coding RNA 526		-10.2134	0.00199601	0.0213908	0.035321	1	1	1	1.00866	2.85547	0.00306649	2.8802	0.00286182
32598	1246	ML	8004948	SHISA6: shisa homolog 6 (Xenopus laevis)		-4.41749	0.00199601	0.0213908	0.035321	1	1	1	1.00866	3.04823	0.00611583	3.07463	0.00835125
32799	892	ML	7928705	TSPAN14: tetraspanin 14		-4.9286	0.00199601	0.0213908	0.035321	1	1	1	1.00865	3.3783	0.00563205	3.40753	0.00859205
33188	182	ML	8112491	SMA5: glucuronidase, beta pseudogene		-7.92606	0.00199601	0.0213908	0.035321	1	1	1	1.00864	3.37993	0.0025482	3.40913	0.00585007
31992	2402	ML	7937438	TMEM80: transmembrane protein 80		-3.44974	0.00199601	0.0213908	0.035321	1	1	1	1.00864	3.199	0.0114643	3.22663	0.0078143
32649	1166	ML	8021783	ZNF236: zinc finger protein 236		-4.50423	0.00199601	0.0213908	0.035321	1	1	1	1.00864	3.2185	0.00867122	3.2463	0.0062522
30290	6225	ML	7977161	TDRD9: tudor domain containing 9		-2.15773	0.00199601	0.0213908	0.035321	1	1	1	1.00863	2.1949	0.00350428	2.21383	0.0147886
31397	3639	ML	7928770	7928770: unannotated transcript: chr10:85954406-85979377		-2.85998	0.00199601	0.0213908	0.035321	1	1	1	1.00861	3.14977	0.00600111	3.1769	0.0152974
31506	3374	ML	7922754	KRT18P28: keratin 18 pseudogene 28		-2.96661	0.00199601	0.0213908	0.035321	1	1	1	1.0086	2.79133	0.0133043	2.81533	0.00439811
31396	3642	ML	8124457	ENST00000463316: ncrna_pseudogene:tRNA_pseudogene chromosome:GRCh37:6:26552706:26552777:-1 gene:ENSG00000242649 gene_biotype:tRNA_pseudogene transcript_biotype:tRNA_pseudogene		-2.85939	0.00199601	0.0213908	0.035321	1	1	1	1.00859	2.18033	0.00879223	2.19907	0.00717379
32885	722	ML	8128795	AKD1: adenylate kinase domain containing 1		-5.28207	0.00199601	0.0213908	0.035321	1	1	1	1.00857	2.6375	0.00641171	2.6601	0.00371618
33182	192	ML	7944382	VPS11: vacuolar protein sorting 11 homolog (S. cerevisiae)		-7.87596	0.00199601	0.0213908	0.035321	1	1	1	1.00856	3.21617	0.00436157	3.2437	0.0042
33102	316	ML	8179595	GABBR1: gamma-aminobutyric acid (GABA) B receptor, 1		-6.83431	0.00199601	0.0213908	0.035321	1	1	1	1.00856	3.4233	0.00688259	3.4526	0.00278747
30790	5032	ML	8113083	FAM172A: family with sequence similarity 172, member A		-2.42974	0.00199601	0.0213908	0.035321	1	1	1	1.00854	3.21457	0.0168921	3.24203	0.00990067
31720	2964	ML	7979808	GENSCAN00000015924: cdna:genscan chromosome:GRCh37:14:68805455:68832354:-1 transcript_biotype:protein_coding		-3.15296	0.00199601	0.0213908	0.035321	1	1	1	1.00854	2.88703	0.0125021	2.9117	0.0052259
32461	1527	ML	7986863	HERC2: HECT and RLD domain containing E3 ubiquitin protein ligase 2		-4.12453	0.00199601	0.0213908	0.035321	1	1	1	1.00852	3.28873	0.0104882	3.31677	0.00534634
31103	4310	ML	8139212	GLI3: GLI family zinc finger 3		-2.64701	0.00199601	0.0213908	0.035321	1	1	1	1.00852	3.2859	0.0086238	3.3139	0.0161651
29867	7281	ML	8129273	C6orf170: chromosome 6 open reading frame 170		-1.95777	0.00199601	0.0213908	0.035321	1	1	1	1.00852	2.9663	0.00947154	2.99157	0.0202478
29881	7248	ML	7929719	R3HCC1L: R3H domain and coiled-coil containing 1-like		-1.96437	0.00199601	0.0213908	0.035321	1	1	1	1.00851	3.08493	0.0217601	3.1112	0.00793032
33200	164	ML	8050719	ITSN2: intersectin 2		-8.14006	0.00199601	0.0213908	0.035321	1	1	1	1.00849	3.048	0.00365103	3.07387	0.00411866
33296	3	ML	7980327	ANGEL1: angel homolog 1 (Drosophila)		-20.494	0.00199601	0.0213908	0.035321	1	0.517	0.517	1.00848	3.29417	0.00011547	3.3221	0.00235797
32829	824	ML	8100714	YTHDC1: YTH domain containing 1		-5.06944	0.00199601	0.0213908	0.035321	1	1	1	1.00848	3.4129	0.00755447	3.44183	0.006376
32792	903	ML	8039740	ZNF329: zinc finger protein 329		-4.91133	0.00199601	0.0213908	0.035321	1	1	1	1.00848	3.03153	0.00835125	3.05723	0.00352184
31811	2764	ML	8152988	SLA: Src-like-adaptor		-3.25051	0.00199601	0.0213908	0.035321	1	1	1	1.00848	2.6389	0.00911482	2.66127	0.00767876
29480	8247	ML	8134415	ACN9: ACN9 homolog (S. cerevisiae)		-1.80732	0.00199601	0.0213908	0.035321	1	1	1	1.00847	2.96973	0.0193635	2.9949	0.0143792
31200	4089	ML	8106303	POLK: polymerase (DNA directed) kappa		-2.71124	0.00199601	0.0213908	0.035321	1	1	1	1.00847	2.90803	0.00930717	2.93267	0.0126895
30945	4668	ML	8000413	NSMCE1: non-SMC element 1 homolog (S. cerevisiae)		-2.54109	0.00199601	0.0213908	0.035321	1	1	1	1.00845	3.28683	0.0161283	3.3146	0.00990353
33178	196	ML	8166703	FAM47C: family with sequence similarity 47, member C		-7.83008	0.00199601	0.0213908	0.035321	1	1	1	1.00845	2.76617	0.00352326	2.78953	0.00378197
30906	4760	ML	7959500	HIP1R: huntingtin interacting protein 1 related		-2.50799	0.00199601	0.0213908	0.035321	1	1	1	1.00844	3.00837	0.0114234	3.03377	0.0133121
30991	4565	ML	8173551	PHKA1: phosphorylase kinase, alpha 1 (muscle)		-2.57021	0.00199601	0.0213908	0.035321	1	1	1	1.00844	3.1549	0.0101474	3.18153	0.0148042
30381	6003	ML	7903667	SYPL2: synaptophysin-like 2		-2.20615	0.00199601	0.0213908	0.035321	1	1	1	1.00844	3.0249	0.0164982	3.05043	0.011387
29460	8299	ML	7906993	GENSCAN00000036206: cdna:genscan chromosome:GRCh37:1:165788590:165788997:1 transcript_biotype:protein_coding		-1.79969	0.00199601	0.0213908	0.035321	1	1	1	1.00844	2.89217	0.0161772	2.91657	0.0170218
30916	4731	ML	8130817	MLLT4-AS1: MLLT4 antisense RNA 1 (non-protein coding)		-2.51725	0.00199601	0.0213908	0.035321	1	1	1	1.00843	3.02423	0.0113597	3.04973	0.0133721
31447	3511	ML	8143209	SVOPL: SVOP-like		-2.9091	0.00199601	0.0213908	0.035321	1	1	1	1.00843	2.89013	0.0133125	2.9145	0.00576628
32134	2127	ML	7906072	LAMTOR2: late endosomal/lysosomal adaptor, MAPK and MTOR activator 2		-3.62163	0.00199601	0.0213908	0.035321	1	1	1	1.00842	3.2305	0.00818352	3.2577	0.0101119
30696	5262	ML	8174141	BEX5: brain expressed, X-linked 5		-2.37648	0.00199601	0.0213908	0.035321	1	1	1	1.00842	2.97337	0.00876147	2.9984	0.0160037
31544	3302	ML	7896381	7896381: unannotated transcript: ---:-------		-3.00102	0.00199601	0.0213908	0.035321	1	1	1	1.00842	3.18863	0.0114727	3.21547	0.010403
30368	6023	ML	8175933	RENBP: renin binding protein		-2.20173	0.00199601	0.0213908	0.035321	1	1	1	1.00841	2.92067	0.0191649	2.94523	0.00249065
31543	3305	ML	7976128	TTC8: tetratricopeptide repeat domain 8		-2.99883	0.00199601	0.0213908	0.035321	1	1	1	1.00841	3.1884	0.0115495	3.2152	0.0103058
32021	2342	ML	7953181	PRMT8: protein arginine methyltransferase 8		-3.48815	0.00199601	0.0213908	0.035321	1	1	1	1.0084	2.8158	0.00561516	2.83947	0.0103234
31251	3972	ML	8132964	SUMF2: sulfatase modifying factor 2		-2.7466	0.00199601	0.0213908	0.035321	1	1	1	1.0084	3.45513	0.0137773	3.48417	0.0120583
32957	587	ML	8108873	ARHGAP26: Rho GTPase activating protein 26		-5.67469	0.00199601	0.0213908	0.035321	1	1	1	1.00839	3.29007	0.00281129	3.31767	0.00794124
32197	1994	ML	7937335	IFITM1: interferon induced transmembrane protein 1		-3.7221	0.00199601	0.0213908	0.035321	1	1	1	1.00839	3.66467	0.00502427	3.6954	0.0133899
32388	1649	ML	8048523	DNAJB2: DnaJ (Hsp40) homolog, subfamily B, member 2		-4.01475	0.00199601	0.0213908	0.035321	1	1	1	1.00838	3.05823	0.0102002	3.08387	0.00427239
31705	2996	ML	8039680	ZNF671: zinc finger protein 671		-3.14323	0.00199601	0.0213908	0.035321	1	1	1	1.00837	2.9959	0.0116512	3.02097	0.00741912
32174	2050	ML	7928354	FAM149B1: family with sequence similarity 149, member B1		-3.67229	0.00199601	0.0213908	0.035321	1	1	1	1.00836	3.09703	0.0107612	3.12293	0.00578129
31485	3435	ML	8143270	ZC3HAV1L: zinc finger CCCH-type, antiviral 1-like		-2.94296	0.00199601	0.0213908	0.035321	1	1	1	1.00836	3.12297	0.0121204	3.14907	0.00943681
33262	70	ML	8001750	SLC38A7: solute carrier family 38, member 7		-9.87294	0.00199601	0.0213908	0.035321	1	1	1	1.00835	3.18463	0.00318957	3.21123	0.00340637
33068	378	ML	8122986	SNX9: sorting nexin 9		-6.53707	0.00199601	0.0213908	0.035321	1	1	1	1.00834	3.34577	0.00638148	3.37367	0.0037314
31243	3993	ML	7939751	NR1H3: nuclear receptor subfamily 1, group H, member 3		-2.74026	0.00199601	0.0213908	0.035321	1	1	1	1.00834	3.00323	0.0102549	3.02827	0.01205
31503	3385	ML	7914764	ZMYM6: zinc finger, MYM-type 6		-2.96233	0.00199601	0.0213908	0.035321	1	1	1	1.00833	3.11243	0.0125862	3.13837	0.00845596
30662	5338	ML	8138592	TRA2A: transformer 2 alpha homolog (Drosophila)		-2.35495	0.00199601	0.0213908	0.035321	1	1	1	1.00829	3.35017	0.0197343	3.37793	0.00525579
30492	5738	ML	7997401	BCMO1: beta-carotene 15,15'-monooxygenase 1		-2.26109	0.00199601	0.0213908	0.035321	1	1	1	1.00829	2.66313	0.0151672	2.6852	0.00746257
30691	5271	ML	8170704	ABCD1: ATP-binding cassette, sub-family D (ALD), member 1		-2.37394	0.00199601	0.0213908	0.035321	1	1	1	1.00828	3.08217	0.0143291	3.1077	0.011905
32481	1481	ML	7941797	ADRBK1: adrenergic, beta, receptor kinase 1		-4.16579	0.00199601	0.0213908	0.035321	1	1	1	1.00828	3.2401	0.00864696	3.26693	0.00705006
32590	1264	ML	7941127	ZFPL1: zinc finger protein-like 1		-4.398	0.00199601	0.0213908	0.035321	1	1	1	1.00828	3.27287	0.00585349	3.29997	0.00892431
32678	1119	ML	7911038	ZNF238: zinc finger protein 238		-4.58466	0.00199601	0.0213908	0.035321	1	1	1	1.00828	3.16837	0.00430155	3.1946	0.00892861
30634	5406	ML	7930148	SFXN2: sideroflexin 2		-2.34096	0.00199601	0.0213908	0.035321	1	1	1	1.00828	3.23283	0.00502427	3.2596	0.0191565
32903	681	ML	7973629	REC8: REC8 homolog (yeast)		-5.41077	0.00199601	0.0213908	0.035321	1	1	1	1.00828	3.2535	0.00710845	3.28043	0.00487887
31283	3905	ML	8003639	WDR81: WD repeat domain 81		-2.76785	0.00199601	0.0213908	0.035321	1	1	1	1.00828	3.0289	0.0117171	3.05397	0.010429
32853	779	ML	7933574	AGAP4: ArfGAP with GTPase domain, ankyrin repeat and PH domain 4		-5.16188	0.00199601	0.0213908	0.035321	1	1	1	1.00827	3.23727	0.000757188	3.26403	0.00894949
31452	3506	ML	7966259	GLTP: glycolipid transfer protein		-2.91089	0.00199601	0.0213908	0.035321	1	1	1	1.00827	3.23743	0.0116903	3.2642	0.0108167
33020	463	ML	8133300	PMS2P6: postmeiotic segregation increased 2 pseudogene 6		-6.09989	0.00199601	0.0213908	0.035321	1	1	1	1.00826	3.4376	0.00260576	3.466	0.00763151
31219	4055	ML	8130422	CNKSR3: CNKSR family member 3		-2.71995	0.00199601	0.0213908	0.035321	1	1	1	1.00826	3.0429	0.0125869	3.06803	0.00988551
32360	1692	ML	7901748	FGGY: FGGY carbohydrate kinase domain containing		-3.98153	0.00199601	0.0213908	0.035321	1	1	1	1.00826	3.08	0.0109891	3.10543	0.00128582
32178	2039	ML	8054308	TBC1D8: TBC1 domain family, member 8 (with GRAM domain)		-3.68419	0.00199601	0.0213908	0.035321	1	1	1	1.00825	3.20217	0.0106651	3.2286	0.00637887
32941	614	ML	8148888	PPP1R16A: protein phosphatase 1, regulatory subunit 16A		-5.58915	0.00199601	0.0213908	0.035321	1	1	1	1.00825	3.1482	0.00562939	3.17417	0.00575007
32511	1418	ML	8026991	PGPEP1: pyroglutamyl-peptidase I		-4.21903	0.00199601	0.0213908	0.035321	1	1	1	1.00825	3.15737	0.00770346	3.1834	0.0074081
33209	154	ML	7896534	7896534: unannotated transcript: ---:-------		-8.33945	0.00199601	0.0213908	0.035321	1	1	1	1.00824	3.55943	0.00281129	3.58877	0.00540494
33216	145	ML	8001099	HERC2: HECT and RLD domain containing E3 ubiquitin protein ligase 2		-8.47375	0.00199601	0.0213908	0.035321	1	1	1	1.00824	3.4103	0.00520288	3.4384	0.00243311
29401	8470	ML	8019964	ARHGAP28: Rho GTPase activating protein 28		-1.7749	0.00199601	0.0213908	0.035321	1	1	1	1.00822	3.2041	0.0252246	3.23043	0.00490748
33197	168	ML	8002266	CHTF8: CTF8, chromosome transmission fidelity factor 8 homolog (S. cerevisiae)		-8.11092	0.00199601	0.0213908	0.035321	1	1	1	1.00821	3.4714	0.0014	3.4999	0.00592284
31066	4394	ML	8170921	PLXNA3: plexin A3		-2.62152	0.00199601	0.0213908	0.035321	1	1	1	1.00821	3.10223	0.0154442	3.1277	0.00667757
28123	11506	ML	7933219	OR13A1: olfactory receptor, family 13, subfamily A, member 1		-1.40184	0.00199601	0.0213908	0.035321	1	1	1	1.00821	2.63567	0.0263879	2.6573	0.00425793
32127	2143	ML	8180201	NM_152473.1: Homo sapiens FLJ32214 protein (FLJ32214), mRNA.		-3.61141	0.00199601	0.0213908	0.035321	1	1	1	1.0082	2.67433	0.00914349	2.69627	0.00520128
32159	2084	ML	8033754	ZNF266: zinc finger protein 266		-3.65146	0.00199601	0.0213908	0.035321	1	1	1	1.00819	3.21433	0.00941612	3.24067	0.00820752
31740	2927	ML	7974835	PRKCH: protein kinase C, eta		-3.17114	0.00199601	0.0213908	0.035321	1	1	1	1.00819	3.097	0.0128012	3.12237	0.00530031
31280	3911	ML	8042402	APLF: aprataxin and PNKP like factor		-2.76613	0.00199601	0.0213908	0.035321	1	1	1	1.00819	3.03633	0.0141553	3.0612	0.00648614
32916	664	ML	8066716	ELMO2: engulfment and cell motility 2		-5.45657	0.00199601	0.0213908	0.035321	1	1	1	1.00819	3.2862	0.00821462	3.3131	0.00233024
32407	1627	ML	8023914	PQLC1: PQ loop repeat containing 1		-4.03307	0.00199601	0.0213908	0.035321	1	1	1	1.00817	3.14103	0.00565803	3.1667	0.00945992
32223	1945	ML	7991401	HDDC3: HD domain containing 3		-3.75722	0.00199601	0.0213908	0.035321	1	1	1	1.00817	3.19637	0.00855823	3.22247	0.00845715
30797	5024	ML	8124594	SCAND3: SCAN domain containing 3		-2.43264	0.00199601	0.0213908	0.035321	1	1	1	1.00817	2.9312	0.0013	2.95513	0.016991
33118	293	ML	7998336	NARFL: nuclear prelamin A recognition factor-like		-6.97108	0.00199601	0.0213908	0.035321	1	1	1	1.00816	2.96867	0.00265016	2.9929	0.00540648
32185	2023	ML	8121927	RNF146: ring finger protein 146		-3.69814	0.00199601	0.0213908	0.035321	1	1	1	1.00816	3.369	0.00791707	3.3965	0.0101592
32401	1633	ML	7927305	AGAP4: ArfGAP with GTPase domain, ankyrin repeat and PH domain 4		-4.02893	0.00199601	0.0213908	0.035321	1	1	1	1.00815	3.18123	0.010602	3.20717	0.00344867
31954	2492	ML	7918474	DRAM2: DNA-damage regulated autophagy modulator 2		-3.39796	0.00199601	0.0213908	0.035321	1	1	1	1.00815	3.4035	0.00756241	3.43123	0.0119438
32867	757	ML	8160935	FANCG: Fanconi anemia, complementation group G		-5.19422	0.00199601	0.0213908	0.035321	1	1	1	1.00815	3.24517	0.00780534	3.2716	0.00409512
32984	535	ML	8101828	TSPAN5: tetraspanin 5		-5.85906	0.00199601	0.0213908	0.035321	1	1	1	1.00814	3.2787	0.00635531	3.3054	0.00468081
30690	5274	ML	8088436	C3orf67: chromosome 3 open reading frame 67		-2.37347	0.00199601	0.0213908	0.035321	1	1	1	1.00814	3.02663	0.0138435	3.05127	0.0114675
31337	3775	ML	7978192	MDP1: magnesium-dependent phosphatase 1		-2.81033	0.00199601	0.0213908	0.035321	1	1	1	1.00813	2.92157	0.00725971	2.94533	0.0127222
32940	615	ML	7934451	AGAP4: ArfGAP with GTPase domain, ankyrin repeat and PH domain 4		-5.58168	0.00199601	0.0213908	0.035321	1	1	1	1.00813	3.2374	0.00165227	3.26373	0.00800271
30882	4825	ML	8083090	ZBTB38: zinc finger and BTB domain containing 38		-2.48797	0.00199601	0.0213908	0.035321	1	1	1	1.00813	3.34487	0.0159701	3.37207	0.0101746
31637	3126	ML	7969830	ZIC2: Zic family member 2		-3.08289	0.00199601	0.0213908	0.035321	1	1	1	1.00813	3.5258	0.00595735	3.55447	0.0149634
31935	2535	ML	8145490	PTK2B: PTK2B protein tyrosine kinase 2 beta		-3.38157	0.00199601	0.0213908	0.035321	1	1	1	1.00812	2.9334	0.00647148	2.95723	0.010351
32988	517	ML	7987526	C15orf57: chromosome 15 open reading frame 57		-5.94657	0.00199601	0.0213908	0.035321	1	1	1	1.00812	3.08667	0.00479618	3.11173	0.00550485
33282	24	ML	8092328	MCCC1: methylcrotonoyl-CoA carboxylase 1 (alpha)		-12.5523	0.00199601	0.0213908	0.035321	1	1	1	1.00812	3.1443	0.00194679	3.16983	0.00293655
30587	5533	ML	8065016	ENST00000410349: ncrna:misc_RNA chromosome:GRCh37:20:11799469:11799739:-1 gene:ENSG00000222281 gene_biotype:misc_RNA transcript_biotype:misc_RNA		-2.31119	0.00199601	0.0213908	0.035321	1	1	1	1.00811	3.3932	0.0039281	3.42073	0.0202567
30764	5103	ML	7973702	LTB4R: leukotriene B4 receptor		-2.41434	0.00199601	0.0213908	0.035321	1	1	1	1.00811	2.87603	0.00776552	2.89937	0.0148291
31101	4313	ML	8167603	CLCN5: chloride channel, voltage-sensitive 5		-2.64585	0.00199601	0.0213908	0.035321	1	1	1	1.00811	3.16933	0.0120268	3.19503	0.0117645
32556	1332	ML	7960280	FBXL14: F-box and leucine-rich repeat protein 14		-4.3039	0.00199601	0.0213908	0.035321	1	1	1	1.00811	3.12823	0.00355715	3.1536	0.0095687
31277	3919	ML	8156506	PTPDC1: protein tyrosine phosphatase domain containing 1		-2.7643	0.00199601	0.0213908	0.035321	1	1	1	1.00811	3.1201	0.0125216	3.1454	0.00972163
31020	4499	ML	7931926	ENST00000516113: ncrna:snoRNA chromosome:GRCh37:10:6059017:6059157:-1 gene:ENSG00000251922 gene_biotype:snoRNA transcript_biotype:snoRNA		-2.58864	0.00199601	0.0213908	0.035321	1	1	1	1.00811	2.43367	0.00920887	2.4534	0.00946203
32493	1447	ML	7966600	SLC24A6: solute carrier family 24 (sodium/lithium/calcium exchanger), member 6		-4.19959	0.00199601	0.0213908	0.035321	1	1	1	1.00811	3.1172	0.00678159	3.14247	0.00791223
32288	1830	ML	8100382	CHIC2: cysteine-rich hydrophobic domain 2		-3.85438	0.00199601	0.0213908	0.035321	1	1	1	1.0081	3.26213	0.0108924	3.28857	0.00473849
29832	7340	ML	7909188	IKBKE: inhibitor of kappa light polypeptide gene enhancer in B-cells, kinase epsilon		-1.94759	0.00199601	0.0213908	0.035321	1	1	1	1.00809	3.17083	0.0227377	3.1965	0.00200749
32901	686	ML	7946128	FAM160A2: family with sequence similarity 160, member A2		-5.3982	0.00199601	0.0213908	0.035321	1	1	1	1.00809	3.15853	0.005058	3.1841	0.00645833
31835	2721	ML	8123494	FAM120B: family with sequence similarity 120B		-3.279	0.00199601	0.0213908	0.035321	1	1	1	1.00809	3.26353	0.0117194	3.28993	0.007558
32233	1923	ML	8031865	ENST00000469492: ncrna_pseudogene:scRNA_pseudogene chromosome:GRCh37:19:58581338:58581656:1 gene:ENSG00000243642 gene_biotype:scRNA_pseudogene transcript_biotype:scRNA_pseudogene		-3.7688	0.00199601	0.0213908	0.035321	1	1	1	1.00809	3.09097	0.00935432	3.11597	0.00667108
32252	1890	ML	8043632	FER1L5: fer-1-like 5 (C. elegans)		-3.8008	0.00199601	0.0213908	0.035321	1	1	1	1.00808	2.84697	0.00344287	2.86997	0.00989966
31258	3947	ML	8145055	BMP1: bone morphogenetic protein 1		-2.75585	0.00199601	0.0213908	0.035321	1	1	1	1.00808	3.0619	0.0142674	3.08663	0.00617117
30519	5671	ML	7964745	TMBIM4: transmembrane BAX inhibitor motif containing 4		-2.27759	0.00199601	0.0213908	0.035321	1	1	1	1.00807	3.2637	0.00410731	3.29003	0.0196001
31502	3387	ML	8131957	SNX10: sorting nexin 10		-2.96047	0.00199601	0.0213908	0.035321	1	1	1	1.00806	3.17467	0.0148736	3.20027	0.00176163
31081	4355	ML	7907297	FMO4: flavin containing monooxygenase 4		-2.63166	0.00199601	0.0213908	0.035321	1	1	1	1.00806	2.886	0.0145908	2.90927	0.00464794
29373	8531	ML	7894451	7894451: unannotated transcript: ---:-------		-1.76714	0.00199601	0.0213908	0.035321	1	1	1	1.00806	3.2915	0.0251561	3.31803	0.00659571
32946	605	ML	8001067	HERC2P4: hect domain and RLD 2 pseudogene 4		-5.61249	0.00199601	0.0213908	0.035321	1	1	1	1.00805	3.38527	0.00800021	3.41253	0.00260832
30408	5947	ML	8010354	GAA: glucosidase, alpha; acid		-2.21541	0.00199601	0.0213908	0.035321	1	1	1	1.00805	3.20403	0.0162279	3.22983	0.0119801
31507	3373	ML	8087433	NICN1: nicolin 1		-2.96727	0.00199601	0.0213908	0.035321	1	1	1	1.00805	3.18773	0.0127583	3.2134	0.0078543
31577	3249	ML	8010295	ENGASE: endo-beta-N-acetylglucosaminidase		-3.02337	0.00199601	0.0213908	0.035321	1	1	1	1.00804	3.03123	0.0138284	3.0556	0.00190788
30767	5098	ML	7947744	LRP4: low density lipoprotein receptor-related protein 4		-2.41588	0.00199601	0.0213908	0.035321	1	1	1	1.00803	3.2658	0.0170666	3.29203	0.00790337
30219	6416	ML	7928411	KIAA0913: KIAA0913		-2.11346	0.00199601	0.0213908	0.035321	1	1	1	1.00802	3.104	0.0116503	3.1289	0.0167538
33264	66	ML	8140258	PMS2P6: postmeiotic segregation increased 2 pseudogene 6		-9.9328	0.00199601	0.0213908	0.035321	1	1	1	1.00802	3.4656	0.00363456	3.4934	0.0032078
32047	2293	ML	8114225	H2AFY: H2A histone family, member Y		-3.51424	0.00199601	0.0213908	0.035321	1	1	1	1.00802	3.46593	0.0119148	3.49373	0.0067656
31042	4450	ML	7931417	JAKMIP3: Janus kinase and microtubule interacting protein 3		-2.60583	0.00199601	0.0213908	0.035321	1	1	1	1.00802	2.80953	0.00905888	2.83207	0.0119274
31866	2665	ML	8133042	ZNF679: zinc finger protein 679		-3.30475	0.00199601	0.0213908	0.035321	1	1	1	1.00802	2.4821	0.00606218	2.502	0.00848705
32682	1115	ML	7915695	MUTYH: mutY homolog (E. coli)		-4.59	0.00199601	0.0213908	0.035321	1	1	1	1.00801	3.14433	0.00913911	3.16953	0.00262742
31966	2455	ML	7924092	SLC30A1: solute carrier family 30 (zinc transporter), member 1		-3.41918	0.00199601	0.0213908	0.035321	1	1	1	1.00801	3.2075	0.00826559	3.2332	0.0100583
31330	3798	ML	8155696	FAM122A: family with sequence similarity 122A		-2.80452	0.00199601	0.0213908	0.035321	1	1	1	1.00801	3.14553	0.0149697	3.17073	0.00425715
30824	4953	ML	8130993	FAM20C: family with sequence similarity 20, member C		-2.4549	0.00199601	0.0213908	0.035321	1	1	1	1.00801	3.32453	0.0049521	3.35117	0.0181269
32207	1976	ML	7979611	ZBTB25: zinc finger and BTB domain containing 25		-3.73833	0.00199601	0.0213908	0.035321	1	1	1	1.00801	3.0806	0.00830181	3.10527	0.00785451
31064	4399	ML	8114415	GFRA3: GDNF family receptor alpha 3		-2.62059	0.00199601	0.0213908	0.035321	1	1	1	1.00801	2.81853	0.0113725	2.8411	0.00965039
32698	1087	ML	7914887	TRAPPC3: trafficking protein particle complex 3		-4.62557	0.00199601	0.0213908	0.035321	1	1	1	1.00799	3.4161	0.00546717	3.4434	0.00863771
30681	5296	ML	7967456	RILPL2: Rab interacting lysosomal protein-like 2		-2.36718	0.00199601	0.0213908	0.035321	1	1	1	1.00799	3.02523	0.0168358	3.0494	0.00540648
30940	4680	ML	8040742	MAPRE3: microtubule-associated protein, RP/EB family, member 3		-2.5367	0.00199601	0.0213908	0.035321	1	1	1	1.00798	2.9834	0.00860872	3.0072	0.013783
33258	80	ML	8140239	PMS2P6: postmeiotic segregation increased 2 pseudogene 6		-9.61591	0.00199601	0.0213908	0.035321	1	1	1	1.00798	3.44327	0.0029023	3.47073	0.00400666
32192	2002	ML	7966293	C12orf76: chromosome 12 open reading frame 76		-3.71552	0.00199601	0.0213908	0.035321	1	1	1	1.00798	2.79623	0.00618574	2.81853	0.00835484
31158	4186	ML	8102713	NUDT6: nudix (nucleoside diphosphate linked moiety X)-type motif 6		-2.68699	0.00199601	0.0213908	0.035321	1	1	1	1.00797	3.08143	0.00665833	3.106	0.014368
29880	7249	ML	7926506	CACNB2: calcium channel, voltage-dependent, beta 2 subunit		-1.96423	0.00199601	0.0213908	0.035321	1	1	1	1.00796	2.911	0.00477598	2.93417	0.0198621
31763	2884	ML	8107706	LMNB1: lamin B1		-3.192	0.00199601	0.0213908	0.035321	1	1	1	1.00796	3.42677	0.00981037	3.45403	0.0110753
31917	2573	ML	8126486	CUL7: cullin 7		-3.35938	0.00199601	0.0213908	0.035321	1	1	1	1.00794	3.15433	0.0068252	3.17937	0.0109546
30346	6076	ML	7919669	MTMR11: myotubularin related protein 11		-2.19339	0.00199601	0.0213908	0.035321	1	1	1	1.00793	2.9914	0.0183518	3.01513	0.00380175
32309	1781	ML	8133223	ENST00000493777: ncrna_pseudogene:Mt_tRNA_pseudogene chromosome:GRCh37:7:68796743:68796811:1 gene:ENSG00000241398 gene_biotype:Mt_tRNA_pseudogene transcript_biotype:Mt_tRNA_pseudogene		-3.89401	0.00199601	0.0213908	0.035321	1	1	1	1.0079	2.37863	0.0044411	2.39743	0.00708543
30437	5877	ML	8017511	CD79B: CD79b molecule, immunoglobulin-associated beta		-2.23204	0.00199601	0.0213908	0.035321	1	1	1	1.0079	2.9357	0.00331512	2.9589	0.0176952
30557	5597	ML	8055992	ACVR1C: activin A receptor, type IC		-2.29745	0.00199601	0.0213908	0.035321	1	1	1	1.0079	2.98393	0.0142837	3.0075	0.010566
32955	590	ML	8118028	VARS2: valyl-tRNA synthetase 2, mitochondrial (putative)		-5.66163	0.00199601	0.0213908	0.035321	1	1	1	1.0079	3.1572	0.0062554	3.18213	0.00436501
33011	476	ML	7962935	PRKAG1: protein kinase, AMP-activated, gamma 1 non-catalytic subunit		-6.05847	0.00199601	0.0213908	0.035321	1	1	1	1.00789	3.4625	0.00485386	3.48983	0.006124
30709	5238	ML	8167887	MAGEH1: melanoma antigen family H, 1		-2.38097	0.00199601	0.0213908	0.035321	1	1	1	1.00789	2.97927	0.00401539	3.00277	0.016617
31150	4198	ML	8000757	DOC2A: double C2-like domains, alpha		-2.68266	0.00199601	0.0213908	0.035321	1	1	1	1.00789	3.08523	0.010289	3.10957	0.0118728
30551	5605	ML	8093494	CRIPAK: cysteine-rich PAK1 inhibitor		-2.29594	0.00199601	0.0213908	0.035321	1	1	1	1.00789	3.2207	0.0185281	3.2461	0.00488672
31943	2517	ML	7970924	STARD13: StAR-related lipid transfer (START) domain containing 13		-3.38836	0.00199601	0.0213908	0.035321	1	1	1	1.00788	2.79507	0.00649025	2.8171	0.00920489
32471	1505	ML	8028112	LRFN3: leucine rich repeat and fibronectin type III domain containing 3		-4.14227	0.00199601	0.0213908	0.035321	1	1	1	1.00788	3.011	0.00343948	3.03473	0.00930878
31801	2799	ML	7925048	EGLN1: egl nine homolog 1 (C. elegans)		-3.2359	0.00199601	0.0213908	0.035321	1	1	1	1.00788	3.17757	0.00480139	3.2026	0.0125096
31998	2394	ML	8066051	NDRG3: NDRG family member 3		-3.45304	0.00199601	0.0213908	0.035321	1	1	1	1.00787	3.42547	0.0128103	3.45243	0.00434319
32842	804	ML	7967210	LOC338799: uncharacterized LOC338799		-5.11423	0.00199601	0.0213908	0.035321	1	1	1	1.00787	3.12073	0.00615332	3.1453	0.0056
33218	141	ML	8140269	PMS2P6: postmeiotic segregation increased 2 pseudogene 6		-8.49506	0.00199601	0.0213908	0.035321	1	1	1	1.00787	3.4432	0.00346554	3.4703	0.00430349
33107	309	ML	7957242	ATXN7L3B: ataxin 7-like 3B		-6.8805	0.00199601	0.0213908	0.035321	1	1	1	1.00786	3.37497	0.00555008	3.4015	0.00371618
28916	9609	ML	7984124	APH1B: anterior pharynx defective 1 homolog B (C. elegans)		-1.62432	0.00199601	0.0213908	0.035321	1	1	1	1.00786	3.22793	0.0259238	3.2533	0.00772075
31900	2608	ML	8048926	SP140L: SP140 nuclear body protein-like		-3.33311	0.00199601	0.0213908	0.035321	1	1	1	1.00786	3.0588	0.00633798	3.08283	0.0107612
33007	483	ML	7927552	AGAP4: ArfGAP with GTPase domain, ankyrin repeat and PH domain 4		-6.05413	0.00199601	0.0213908	0.035321	1	1	1	1.00785	3.29167	0.00110151	3.3175	0.00730821
33062	386	ML	8090133	CCDC14: coiled-coil domain containing 14		-6.47383	0.00199601	0.0213908	0.035321	1	1	1	1.00783	3.3664	0.00623859	3.39277	0.00329292
30775	5080	ML	8122317	HEBP2: heme binding protein 2		-2.41848	0.00199601	0.0213908	0.035321	1	1	1	1.00783	3.44953	0.0070946	3.47653	0.0179881
30850	4906	ML	7999317	TMEM186: transmembrane protein 186		-2.46807	0.00199601	0.0213908	0.035321	1	1	1	1.00783	3.0537	0.0167275	3.0776	0.00122882
31818	2752	ML	8131253	FOXK1: forkhead box K1		-3.25896	0.00199601	0.0213908	0.035321	1	1	1	1.00782	3.2055	0.0105825	3.23057	0.0080928
33169	210	ML	8179451	8179451: unannotated transcript: chr6:32121301-32136054		-7.73663	0.00199601	0.0213908	0.035321	1	1	1	1.00782	3.1502	0.00323574	3.17483	0.0044658
32079	2238	ML	8008682	MSI2: musashi homolog 2 (Drosophila)		-3.55023	0.00199601	0.0213908	0.035321	1	1	1	1.00781	3.30667	0.00902238	3.3325	0.0088
30599	5493	ML	8063476	MC3R: melanocortin 3 receptor		-2.32123	0.00199601	0.0213908	0.035321	1	1	1	1.00781	2.7099	0.0115113	2.73107	0.010814
31123	4264	ML	8075910	RAC2: ras-related C3 botulinum toxin substrate 2 (rho family, small GTP binding protein Rac2)		-2.65988	0.00199601	0.0213908	0.035321	1	1	1	1.00781	3.11557	0.00721411	3.1399	0.0141078
31932	2544	ML	7960863	7960863: unannotated transcript: chr12:8037007-8037114		-3.37506	0.00199601	0.0213908	0.035321	1	1	1	1.00781	2.8982	0.00502096	2.92083	0.0104739
33228	129	ML	8150276	PPAPDC1B: phosphatidic acid phosphatase type 2 domain containing 1B		-8.68821	0.00199601	0.0213908	0.035321	1	1	1	1.0078	3.3198	0.00473181	3.3457	0.0020664
31905	2600	ML	7954789	ALG10: asparagine-linked glycosylation 10, alpha-1,2-glucosyltransferase homolog (S. pombe)		-3.33855	0.00199601	0.0213908	0.035321	1	1	1	1.0078	3.22643	0.0059702	3.2516	0.0116116
31438	3540	ML	7950899	RAB38: RAB38, member RAS oncogene family		-2.90111	0.00199601	0.0213908	0.035321	1	1	1	1.0078	3.35467	0.00610027	3.38083	0.014382
31481	3449	ML	8147079	LRRCC1: leucine rich repeat and coiled-coil centrosomal protein 1		-2.9369	0.00199601	0.0213908	0.035321	1	1	1	1.0078	3.1766	0.0130985	3.20137	0.00646323
31140	4220	ML	8009995	UNK: unkempt homolog (Drosophila)		-2.67683	0.00199601	0.0213908	0.035321	1	1	1	1.00778	3.27363	0.01545	3.2991	0.00572975
29356	8572	ML	8056993	ENST00000459157: ncrna:snoRNA chromosome:GRCh37:2:178210586:178210689:-1 gene:ENSG00000238295 gene_biotype:snoRNA transcript_biotype:snoRNA		-1.75972	0.00199601	0.0213908	0.035321	1	1	1	1.00777	2.96317	0.00612726	2.9862	0.0218275
30877	4835	ML	7927874	ENST00000384707: ncrna:misc_RNA chromosome:GRCh37:10:70262909:70263016:1 gene:ENSG00000207438 gene_biotype:misc_RNA transcript_biotype:misc_RNA		-2.48395	0.00199601	0.0213908	0.035321	1	1	1	1.00777	2.2562	0.0114407	2.27373	0.00431084
32093	2217	ML	7991453	FAM174B: family with sequence similarity 174, member B		-3.56301	0.00199601	0.0213908	0.035321	1	1	1	1.00777	3.40653	0.00170392	3.433	0.0127526
33190	180	ML	8118509	PPT2-EGFL8: PPT2-EGFL8 readthrough		-7.93372	0.00199601	0.0213908	0.035321	1	1	1	1.00776	3.1466	0.00306431	3.17103	0.00436616
31137	4227	ML	8074569	GGT2: gamma-glutamyltransferase 2		-2.67467	0.00199601	0.0213908	0.035321	1	1	1	1.00776	3.06203	0.0119643	3.0858	0.00968143
28998	9398	ML	8042066	CCDC104: coiled-coil domain containing 104		-1.64939	0.00199601	0.0213908	0.035321	1	1	1	1.00776	3.02887	0.0243591	3.05237	0.00395264
31246	3988	ML	8142059	ENST00000467823: ncrna_pseudogene:scRNA_pseudogene chromosome:GRCh37:7:105060344:105060477:-1 gene:ENSG00000239982 gene_biotype:scRNA_pseudogene transcript_biotype:scRNA_pseudogene		-2.74165	0.00199601	0.0213908	0.035321	1	1	1	1.00775	2.9561	0.00226053	2.979	0.0142895
30971	4606	ML	7985959	GDPGP1: GDP-D-glucose phosphorylase 1		-2.55814	0.00199601	0.0213908	0.035321	1	1	1	1.00774	2.83493	0.0133422	2.85687	0.00652099
33195	170	ML	8119444	FOXP4: forkhead box P4		-8.09653	0.00199601	0.0213908	0.035321	1	1	1	1.00774	3.11127	0.00130512	3.13533	0.00498029
30637	5401	ML	8023246	C18orf32: chromosome 18 open reading frame 32		-2.34199	0.00199601	0.0213908	0.035321	1	1	1	1.00773	3.2072	0.00980867	3.232	0.0154981
32516	1411	ML	7953303	PLEKHG6: pleckstrin homology domain containing, family G (with RhoGef domain) member 6		-4.22886	0.00199601	0.0213908	0.035321	1	1	1	1.00773	3.10407	0.00221435	3.12807	0.00957723
30660	5345	ML	7916075	ENST00000516223: ncrna:snRNA chromosome:GRCh37:1:52004297:52004401:-1 gene:ENSG00000252032 gene_biotype:snRNA transcript_biotype:snRNA		-2.35398	0.00199601	0.0213908	0.035321	1	1	1	1.00771	1.94903	0.0103665	1.96407	0.00385919
30998	4548	ML	8081503	DZIP3: DAZ interacting protein 3, zinc finger		-2.57486	0.00199601	0.0213908	0.035321	1	1	1	1.00771	3.26313	0.0121204	3.2883	0.0118191
33120	290	ML	8002041	ATP6V0D1: ATPase, H+ transporting, lysosomal 38kDa, V0 subunit d1		-6.99753	0.00199601	0.0213908	0.035321	1	1	1	1.0077	3.4229	0.00642106	3.44927	0.00116762
30604	5482	ML	7920575	PBXIP1: pre-B-cell leukemia homeobox interacting protein 1		-2.32404	0.00199601	0.0213908	0.035321	1	1	1	1.0077	3.10017	0.00565803	3.12403	0.0168634
29851	7303	ML	7896691	7896691: unannotated transcript: ---:-------		-1.95443	0.00199601	0.0213908	0.035321	1	1	1	1.00769	2.9963	0.0125583	3.01933	0.0160923
29852	7304	ML	8075886	IL2RB: interleukin 2 receptor, beta		-1.95443	0.00199601	0.0213908	0.035321	1	1	1	1.00769	2.9963	0.0125583	3.01933	0.0160923
33139	253	ML	8140280	PMS2L2: postmeiotic segregation increased 2-like 2 pseudogene		-7.29359	0.00199601	0.0213908	0.035321	1	1	1	1.00768	3.42693	0.00395769	3.45327	0.00484183
30485	5754	ML	7997542	NECAB2: N-terminal EF-hand calcium binding protein 2		-2.25785	0.00199601	0.0213908	0.035321	1	1	1	1.00767	3.05273	0.0166422	3.07613	0.0067278
32129	2137	ML	7917672	ENST00000491088: ncrna_pseudogene:scRNA_pseudogene chromosome:GRCh37:1:92410895:92411164:-1 gene:ENSG00000242555 gene_biotype:scRNA_pseudogene transcript_biotype:scRNA_pseudogene		-3.61355	0.00199601	0.0213908	0.035321	1	1	1	1.00766	2.8806	0.00863771	2.90267	0.00610437
31583	3237	ML	8005707	MAP2K3: mitogen-activated protein kinase kinase 3		-3.02821	0.00199601	0.0213908	0.035321	1	1	1	1.00766	3.22063	0.00750755	3.2453	0.0119453
30379	6005	ML	8105456	SETD9: SET domain containing 9		-2.20572	0.00199601	0.0213908	0.035321	1	1	1	1.00766	2.88137	0.00380701	2.90343	0.0169045
30530	5652	ML	8133258	WBSCR17: Williams-Beuren syndrome chromosome region 17		-2.28194	0.00199601	0.0213908	0.035321	1	1	1	1.00765	3.29993	0.00759627	3.32517	0.0175819
30284	6237	ML	8004201	ALOX12P2: arachidonate 12-lipoxygenase pseudogene 2		-2.15401	0.00199601	0.0213908	0.035321	1	1	1	1.00764	2.932	0.0118051	2.9544	0.013604
32981	540	ML	8124654	GABBR1: gamma-aminobutyric acid (GABA) B receptor, 1		-5.84865	0.00199601	0.0213908	0.035321	1	1	1	1.00764	3.36973	0.00744737	3.39547	0.00161658
29406	8445	ML	7929145	HECTD2: HECT domain containing E3 ubiquitin protein ligase 2		-1.77891	0.00199601	0.0213908	0.035321	1	1	1	1.00763	3.10903	0.0207418	3.13277	0.0101864
32571	1301	ML	8060339	NRSN2: neurensin 2		-4.34668	0.00199601	0.0213908	0.035321	1	1	1	1.00763	3.17923	0.00565184	3.2035	0.00784602
31478	3454	ML	8129522	MED23: mediator complex subunit 23		-2.93557	0.00199601	0.0213908	0.035321	1	1	1	1.00763	3.32977	0.0122517	3.35517	0.00863095
31812	2763	ML	7933290	BMS1P5: BMS1 pseudogene 5		-3.25072	0.00199601	0.0213908	0.035321	1	1	1	1.00762	3.3336	0.00822131	3.359	0.0107503
32080	2237	ML	8108579	TMCO6: transmembrane and coiled-coil domains 6		-3.55027	0.00199601	0.0213908	0.035321	1	1	1	1.00761	3.2525	0.0116228	3.27727	0.00330202
[truncated: 1,108 more rows]
